# Supplementary material for: Genome sequencing and analysis of an emergent SARS-CoV-2 variant characterized by multiple spike protein mutations detected from the Central Visayas Region of the Philippines
Source: bioRxiv or medRxiv preprint supplement (doi:10.1101/2021.03.03.21252812), 2021-03-06
Supplement: Supplementary file [file media-1.pdf]

We gratefully acknowledge the following Authors from the Originating laboratories responsible for obtaining the specimens, as well as the Submitting laboratories where the genome data were generated and shared via GISAID, on which this research is based.

All Submitters of data may be contacted directly via [www.gisaid.org](http://www.gisaid.org)

Authors are sorted alphabetically.

| Accession ID                                                                                                                   | Originating Laboratory                                                                                       | Submitting Laboratory                                                                 | Authors                                                                                                                                                                                                                                                                                                                                                                                                                                                            |
|--------------------------------------------------------------------------------------------------------------------------------|--------------------------------------------------------------------------------------------------------------|---------------------------------------------------------------------------------------|--------------------------------------------------------------------------------------------------------------------------------------------------------------------------------------------------------------------------------------------------------------------------------------------------------------------------------------------------------------------------------------------------------------------------------------------------------------------|
| EPI_ISL_416036                                                                                                                 | National Influenza Center - Instituto Adolfo Lutz                                                            | Instituto Adolfo Lutz, Interdisciplinary Procedures Center, Strategic Laboratory      | Claudio Tavares Sacchi, Claudia Regina Gonçalves, Carlos Henrique Camargo, Erica Valessa Ramos Gomes, Fabiana Cristina Pereira dos Santos, Daniela Bernardes Borges da Silva, Simone Guadagnucci Morillo, Adriano Abbud, Adriana Bugno, Maria do Carmo Sampaio Tavares Timenetsky, Terezinha Maria de Paiva                                                                                                                                                        |
| EPI_ISL_427292                                                                                                                 | LACEN-AL - Laboratorio Central de Alagoas                                                                    | Instituto Oswaldo Cruz FIOCRUZ - Laboratory of Respiratory Viruses and Measles (LVRS) | Paola Resende, Fernando Motta, Luciana Appolinario, Sunando Roy, Aline Mattos, Milene Miranda, Cristiana Garcia, Bráulia Caetano, Maria Ogrzewalska, Priscila Born, Jonathan Lopes, Marilda Siqueira                                                                                                                                                                                                                                                               |
| EPI_ISL_429701                                                                                                                 | Central Public Health Laboratory/Octávio Magalhães Institute (IOM) from the Ezequiel Dias Foundation (FUNED) | Instituto Octávio Magalhães / Fundação Ezequiel Dias (IOM/Funed)                      | Talita Adelino, Jolison Xavier, Marta Giovanetti, Wagner Fonseca, Marcos Vinicius Silva, Luiz Carlos Junior Alcantara, Marluce Aparecida Assunção Oliveira                                                                                                                                                                                                                                                                                                         |
| EPI_ISL_431180, EPI_ISL_431240                                                                                                 | Fujian Center for Disease Control and Prevention                                                             | Fujian Center for Disease Control and Prevention                                      | Lin Qi, Huang Zhimiao, Zhang Yanhua, Weng Yuwei                                                                                                                                                                                                                                                                                                                                                                                                                    |
| EPI_ISL_445380                                                                                                                 | Ramathibodi Hospital                                                                                         | COVID-19 Network Investigations (CONI) Alliance                                       | Elizabeth Batty, Wasun Chantratita, Thanat Chookajorn, Stefan Fernandez, Angkana Huang, Anthony R. Jones, Khajohn Joonsalak, Chonticha Klungtong, Theerarat Kochakarn, Namfon Kotanan, Krittikorn Kumpornsin, Wudtichai Manasatienkij, Bhakbhoom Panthan, Ekawat Pasomsub, Kingkan Rakmanee, Insee Sensor, Janjira Thaipadungpanit, Arporn Wangwiwatsin, Treewat Watthanachockchai                                                                                 |
| EPI_ISL_456088                                                                                                                 | LACEN RJ - Laboratório Central de Saúde Pública Noel Nutels                                                  | Laboratory of Respiratory Viruses and Measles, Oswaldo Cruz Institute, FIOCRUZ        | Paola Resende, Luciana Appolinario, Fernando Motta, Aline Mattos, Milene Miranda, Cristiana Garcia, Bráulia Caetano, Maria Ogrzewalska, Jonathan Lopes, Marilda Siqueira                                                                                                                                                                                                                                                                                           |
| EPI_ISL_456869                                                                                                                 | West of Scotland Specialist Virology Centre, NHSGGC / MRC-University of Glasgow Centre for Virus Research    | COVID-19 Genomics UK (COG-UK) Consortium                                              | Ana da Silva Filipe, Natasha Johnson, Kathy Smollett, Daniel Mair, Stephen Carmichael, Lily Tong, Jenna Nichols, Elihu Aranday-Cortes, Kirstyn Brunker, Yasmin Parr, Kyriaki Nomikou, Sarah McDonald, Marc Niebel, Patawee Asamaphan; Richard Orton, Joseph Hughes, Sreenu Vattipally, David L Robertson; Alasdair MacLean, Rory Gunson; Kathy Li, Natasha Jesudason, Rajiv Shah, James Shepherd, Antonia Ho, Emma Thomson                                         |
| EPI_ISL_458140, EPI_ISL_458141, EPI_ISL_458146, EPI_ISL_458147                                                                 | Evandro Chagas Institute                                                                                     | Evandro Chagas Institute                                                              | Santos, M.C.; Silva, A.M.; Junior, W.D.C.; Barbagelata, L.S.; Ferreira, J.A.; Sousa, E.M.A.; da Silva, P.S.; Resque, H.R; Martins, L.C.; Sousa Junior, E.C.; Viana, G.M.R                                                                                                                                                                                                                                                                                          |
| EPI_ISL_461606, EPI_ISL_461678                                                                                                 | West of Scotland Specialist Virology Centre, NHSGGC / MRC-University of Glasgow Centre for Virus Research    | COVID-19 Genomics UK (COG-UK) Consortium                                              | Ana da Silva Filipe, Natasha Johnson, Kathy Smollett, Daniel Mair, Stephen Carmichael, Lily Tong, Jenna Nichols, Elihu Aranday-Cortes, Kirstyn Brunker, Yasmin Parr, Kyriaki Nomikou; Sarah McDonald, Marc Niebel, Patawee Asamaphan; Richard Orton, Joseph Hughes, Sreenu Vattipally, David L Robertson; Alasdair MacLean, Rory Gunson; Kathy Li, Natasha Jesudason, Rajiv Shah, James Shepherd, Antonia Ho, Emma Thomson                                         |
| EPI_ISL_467359, EPI_ISL_467366                                                                                                 | Laboratory of Respiratory Viruses and Measles, Oswaldo Cruz Institute, FIOCRUZ                               | Laboratory of Respiratory Viruses and Measles, Oswaldo Cruz Institute, FIOCRUZ        | Paola Resende, Luciana Appolinario, Fernando Motta, Anna Carolina Paixão, Ana Carolina Mendonça, Aline Mattos, Milene Miranda, Cristiana Garcia, Bráulia Caetano, Maria Ogrzewalska, Jonathan Lopes, Marilda Siqueira                                                                                                                                                                                                                                              |
| EPI_ISL_468305                                                                                                                 | Centro de Vigilância a Saude de Diadema                                                                      | Instituto Adolfo Lutz, Interdisciplinary Procedures Center, Strategic Laboratory      | Claudio Tavares Sacchi, Claudia Regina Gonçalves, Erica Valessa Ramos Gomes                                                                                                                                                                                                                                                                                                                                                                                        |
| EPI_ISL_468311, EPI_ISL_468312                                                                                                 | Hospital Municipal Dr Ignacio Proenca de Gouvea                                                              | Instituto Adolfo Lutz, Interdisciplinary Procedures Center, Strategic Laboratory      | Claudio Tavares Sacchi, Claudia Regina Gonçalves, Erica Valessa Ramos Gomes                                                                                                                                                                                                                                                                                                                                                                                        |
| EPI_ISL_468313                                                                                                                 | Vigilância Epidemiológica de São Bernardo do Campo                                                           | Instituto Adolfo Lutz, Interdisciplinary Procedures Center, Strategic Laboratory      | Claudio Tavares Sacchi, Claudia Regina Gonçalves, Erica Valessa Ramos Gomes                                                                                                                                                                                                                                                                                                                                                                                        |
| EPI_ISL_468314                                                                                                                 | CTA Centro de Testagem e Aconselhamento                                                                      | Instituto Adolfo Lutz, Interdisciplinary Procedures Center, Strategic Laboratory      | Claudio Tavares Sacchi, Claudia Regina Gonçalves, Erica Valessa Ramos Gomes                                                                                                                                                                                                                                                                                                                                                                                        |
| EPI_ISL_468316                                                                                                                 | UPA Vila Assis                                                                                               | Instituto Adolfo Lutz, Interdisciplinary Procedures Center, Strategic Laboratory      | Claudio Tavares Sacchi, Claudia Regina Gonçalves, Erica Valessa Ramos Gomes                                                                                                                                                                                                                                                                                                                                                                                        |
| EPI_ISL_468321                                                                                                                 | Hospital Universitario da USP                                                                                | Instituto Adolfo Lutz, Interdisciplinary Procedures Center, Strategic Laboratory      | Claudio Tavares Sacchi, Claudia Regina Gonçalves, Erica Valessa Ramos Gomes                                                                                                                                                                                                                                                                                                                                                                                        |
| EPI_ISL_470600, EPI_ISL_470602, EPI_ISL_470604, EPI_ISL_470605, EPI_ISL_470607, EPI_ISL_470608, EPI_ISL_470610, EPI_ISL_470612 | Hermes Pardini                                                                                               | Bioinformatics Laboratory / LNCC                                                      | Alexandra Gerber, Ana Paula Guimarães, Luiz Gonzaga Paula de Almeida, Ronaldo da Silva Francisco Junior, Mariane Talon, Filipe Romero, Átila Duque Rossi, Terezinha Marta Pereira, working group UFRJ, Jaqueline Goes de Jesus, Ingra Morales Claro, Ester Cerdeira Sabino, Nuno Rodrigues Faria, CADDE-group, Laboratorio Hermes Pardini, Laboratorio Simile, working group UFMG, Amilcar Tanuri, Carolina Voloch, Renato Santana Aguiar e Ana Tereza Vasconcelos |
| EPI_ISL_470638                                                                                                                 | Laboratorio de Virologia Molecular / UFRJ                                                                    | Bioinformatics Laboratory / LNCC                                                      | Alexandra Gerber, Ana Paula Guimarães, Luiz Gonzaga Paula de Almeida, Ronaldo da Silva Francisco Junior, Mariane Talon, Filipe Romero, Átila Duque Rossi, Terezinha Marta Pereira, working group UFRJ, Jaqueline Goes de Jesus, Ingra Morales Claro, Ester Cerdeira Sabino, Nuno Rodrigues Faria, CADDE-group, Laboratorio Hermes Pardini, Laboratorio Simile, working group UFMG, Amilcar Tanuri, Carolina Voloch, Renato Santana Aguiar e Ana Tereza Vasconcelos |
| EPI_ISL_470651, EPI_ISL_470653, EPI_ISL_470654                                                                                 | Hermes Pardini                                                                                               | Bioinformatics Laboratory / LNCC                                                      | Alexandra Gerber, Ana Paula Guimarães, Luiz Gonzaga Paula de Almeida, Ronaldo da Silva Francisco Junior, Mariane Talon, Filipe Romero, Átila Duque Rossi, Terezinha Marta Pereira, working group UFRJ, Jaqueline Goes de Jesus, Ingra Morales Claro, Ester Cerdeira Sabino, Nuno Rodrigues Faria, CADDE-group, Laboratorio Hermes Pardini, Laboratorio Simile, working group UFMG, Amilcar Tanuri, Carolina Voloch, Renato Santana Aguiar e Ana Tereza Vasconcelos |
| EPI_ISL_471541                                                                                                                 | Hospital Geral Santa Marcelina                                                                               | Instituto Adolfo Lutz, Interdisciplinary Procedures Center, Strategic Laboratory      | Claudio Tavares Sacchi, Claudia Regina Gonçalves, Erica Valessa Ramos Gomes                                                                                                                                                                                                                                                                                                                                                                                        |
| EPI_ISL_471542                                                                                                                 | Secretaria de Saude de Mogi das Cruzes                                                                       | Instituto Adolfo Lutz, Interdisciplinary Procedures Center, Strategic Laboratory      | Claudio Tavares Sacchi, Claudia Regina Gonçalves, Erica Valessa Ramos Gomes                                                                                                                                                                                                                                                                                                                                                                                        |
| EPI_ISL_471545                                                                                                                 | Hospital Sao Paulo de Ensino da Unifesp                                                                      | Instituto Adolfo Lutz, Interdisciplinary Procedures Center, Strategic Laboratory      | Claudio Tavares Sacchi, Claudia Regina Gonçalves, Erica Valessa Ramos Gomes                                                                                                                                                                                                                                                                                                                                                                                        |
| EPI_ISL_471546                                                                                                                 | AMA DR Jose Soares Hungria                                                                                   | Instituto Adolfo Lutz, Interdisciplinary Procedures Center, Strategic Laboratory      | Claudio Tavares Sacchi, Claudia Regina Gonçalves, Erica Valessa Ramos Gomes                                                                                                                                                                                                                                                                                                                                                                                        |
| EPI_ISL_471549                                                                                                                 | Hospital Municipal Carmen Prudente                                                                           | Instituto Adolfo Lutz, Interdisciplinary Procedures Center, Strategic Laboratory      | Claudio Tavares Sacchi, Claudia Regina Gonçalves, Erica Valessa Ramos Gomes                                                                                                                                                                                                                                                                                                                                                                                        |
| EPI_ISL_471552                                                                                                                 | Hospital Sancta Maggiore                                                                                     | Instituto Adolfo Lutz, Interdisciplinary Procedures Center, Strategic Laboratory      | Claudio Tavares Sacchi, Claudia Regina Gonçalves, Erica Valessa Ramos Gomes                                                                                                                                                                                                                                                                                                                                                                                        |
| EPI_ISL_471556                                                                                                                 | Pronto Socorro Jose Ibrahim                                                                                  | Instituto Adolfo Lutz, Interdisciplinary Procedures Center, Strategic Laboratory      | Claudio Tavares Sacchi, Claudia Regina Gonçalves, Erica Valessa Ramos Gomes                                                                                                                                                                                                                                                                                                                                                                                        |
| EPI_ISL_471562, EPI_ISL_471582                                                                                                 | Hosp. Municipal Prof. Dr. Alípio Corrêa Netto                                                                | Instituto Adolfo Lutz, Interdisciplinary Procedures Center,                           | Claudio Tavares Sacchi, Claudia Regina Gonçalves, Erica Valessa Ramos Gomes                                                                                                                                                                                                                                                                                                                                                                                        |

| Strategic Laboratory                                                                                                                                                                                                                                                                                                                                                                                                                                                                                                                                                                                                                                                                           |                                                                                                                                                                                                                     |                                                                                                                                                     |                                                                                                                                                                                                                                                                                                                                                                                                                                                                                                                                                                                                                                                                                            |
|------------------------------------------------------------------------------------------------------------------------------------------------------------------------------------------------------------------------------------------------------------------------------------------------------------------------------------------------------------------------------------------------------------------------------------------------------------------------------------------------------------------------------------------------------------------------------------------------------------------------------------------------------------------------------------------------|---------------------------------------------------------------------------------------------------------------------------------------------------------------------------------------------------------------------|-----------------------------------------------------------------------------------------------------------------------------------------------------|--------------------------------------------------------------------------------------------------------------------------------------------------------------------------------------------------------------------------------------------------------------------------------------------------------------------------------------------------------------------------------------------------------------------------------------------------------------------------------------------------------------------------------------------------------------------------------------------------------------------------------------------------------------------------------------------|
| EPI_ISL_471647                                                                                                                                                                                                                                                                                                                                                                                                                                                                                                                                                                                                                                                                                 | Hospital Municipal de Barueri Dr. Francisco Moran                                                                                                                                                                   | Instituto Adolfo Lutz, Interdisciplinary Procedures Center, Strategic Laboratory                                                                    | Claudio Tavares Sacchi, Claudia Regina Gonçalves, Erica Valessa Ramos Gomes                                                                                                                                                                                                                                                                                                                                                                                                                                                                                                                                                                                                                |
| EPI_ISL_471648                                                                                                                                                                                                                                                                                                                                                                                                                                                                                                                                                                                                                                                                                 | UBS e Pronto Socorro Jd. Jacira                                                                                                                                                                                     | Instituto Adolfo Lutz, Interdisciplinary Procedures Center, Strategic Laboratory                                                                    | Claudio Tavares Sacchi, Claudia Regina Gonçalves, Erica Valessa Ramos Gomes                                                                                                                                                                                                                                                                                                                                                                                                                                                                                                                                                                                                                |
| EPI_ISL_473651                                                                                                                                                                                                                                                                                                                                                                                                                                                                                                                                                                                                                                                                                 | West of Scotland Specialist Virology Centre, NHSGGC / MRC-University of Glasgow Centre for Virus Research                                                                                                           | COVID-19 Genomics UK (COG-UK) Consortium                                                                                                            | Ana da Silva Filipe, Natasha Johnson, Kathy Smollett, Daniel Mair, Stephen Carmichael, Lily Tong, Jenna Nichols, Elihu Aranday-Cortes, Kirstyn Brunker, Yasmin Parr, Alice Broos, Kyriaki Nomikou; Sarah McDonald, Marc Niebel, Patawee Asamaphan; Richard Orton, Joseph Hughes, Sreenu Vattipally, David L Robertson; Alasdair MacLean, Rory Gunson; Kathy Li, Natasha Jesudason, Rajiv Shah, James Shepherd, Antonia Ho, Emma Thomson                                                                                                                                                                                                                                                    |
| EPI_ISL_476152, EPI_ISL_476154, EPI_ISL_476156, EPI_ISL_476157, EPI_ISL_476159, EPI_ISL_476161, EPI_ISL_476162, EPI_ISL_476163, EPI_ISL_476165, EPI_ISL_476166, EPI_ISL_476167, EPI_ISL_476169                                                                                                                                                                                                                                                                                                                                                                                                                                                                                                 | see above                                                                                                                                                                                                           | Laboratório de Patologia Clínica - UNICAMP                                                                                                          | Laboratório de Estudos de Virus Emergentes - UNICAMP                                                                                                                                                                                                                                                                                                                                                                                                                                                                                                                                                                                                                                       |
| EPI_ISL_476181, EPI_ISL_476187                                                                                                                                                                                                                                                                                                                                                                                                                                                                                                                                                                                                                                                                 | DB Diagnósticos do Brasil                                                                                                                                                                                           | Instituto de Medicina Tropical da Univesidade de São Paulo                                                                                          | Samples: Nelson Gaburo Jr; Sequencing: Ingra Morales Claro, Jaqueline Goes de Jesus, Erika Regina Manuli, Flavia Cristina da Silva Sales, Thais de Moura Coletti, Camila Alves Maia da Silva, Mariana Severo Ramundo, Giula Magalhaes Ferreira, Darlan da Silva Candido, Julien Theze, Nuno Faria, Ester Sabino                                                                                                                                                                                                                                                                                                                                                                            |
| EPI_ISL_476203, EPI_ISL_476205, EPI_ISL_476206, EPI_ISL_476207, EPI_ISL_476208, EPI_ISL_476222, EPI_ISL_476223, EPI_ISL_476237, EPI_ISL_476239, EPI_ISL_476243, EPI_ISL_476244, EPI_ISL_476252, EPI_ISL_476253, EPI_ISL_476255, EPI_ISL_476257, EPI_ISL_476259, EPI_ISL_476260, EPI_ISL_476261, EPI_ISL_476262, EPI_ISL_476266, EPI_ISL_476267, EPI_ISL_476268, EPI_ISL_476270, EPI_ISL_476272, EPI_ISL_476277                                                                                                                                                                                                                                                                                 | see above                                                                                                                                                                                                           | Hospital da Clínicas da Faculdade de Medicina da Universidade de São Paulo                                                                          | Instituto de Medicina Tropical da Univesidade de São Paulo                                                                                                                                                                                                                                                                                                                                                                                                                                                                                                                                                                                                                                 |
| EPI_ISL_476279, EPI_ISL_476282, EPI_ISL_476287, EPI_ISL_476293, EPI_ISL_476294, EPI_ISL_476312, EPI_ISL_476313, EPI_ISL_476314, EPI_ISL_476318, EPI_ISL_476321, EPI_ISL_476322, EPI_ISL_476323, EPI_ISL_476325                                                                                                                                                                                                                                                                                                                                                                                                                                                                                 | see above                                                                                                                                                                                                           | DB Diagnósticos do Brasil                                                                                                                           | Instituto de Medicina Tropical da Univesidade de São Paulo                                                                                                                                                                                                                                                                                                                                                                                                                                                                                                                                                                                                                                 |
| EPI_ISL_476337, EPI_ISL_476338, EPI_ISL_476340, EPI_ISL_476341, EPI_ISL_476343, EPI_ISL_476345, EPI_ISL_476346, EPI_ISL_476347, EPI_ISL_476349                                                                                                                                                                                                                                                                                                                                                                                                                                                                                                                                                 |                                                                                                                                                                                                                     | Laboratório de Patologia Clínica - UNICAMP                                                                                                          | Laboratório de Estudos de Virus Emergentes - UNICAMP                                                                                                                                                                                                                                                                                                                                                                                                                                                                                                                                                                                                                                       |
| EPI_ISL_476353, EPI_ISL_476354, EPI_ISL_476361, EPI_ISL_476363, EPI_ISL_476364, EPI_ISL_476366, EPI_ISL_476367, EPI_ISL_476369, EPI_ISL_476370                                                                                                                                                                                                                                                                                                                                                                                                                                                                                                                                                 |                                                                                                                                                                                                                     | DB Diagnósticos do Brasil                                                                                                                           | Instituto de Medicina Tropical da Univesidade de São Paulo                                                                                                                                                                                                                                                                                                                                                                                                                                                                                                                                                                                                                                 |
| EPI_ISL_476372, EPI_ISL_476373, EPI_ISL_476375, EPI_ISL_476376, EPI_ISL_476379, EPI_ISL_476380, EPI_ISL_476382, EPI_ISL_476384, EPI_ISL_476386                                                                                                                                                                                                                                                                                                                                                                                                                                                                                                                                                 |                                                                                                                                                                                                                     | Hospital da Clínicas da Faculdade de Medicina da Universidade de São Paulo                                                                          | Instituto de Medicina Tropical da Univesidade de São Paulo                                                                                                                                                                                                                                                                                                                                                                                                                                                                                                                                                                                                                                 |
| EPI_ISL_476387, EPI_ISL_476388, EPI_ISL_476389, EPI_ISL_476390, EPI_ISL_476391, EPI_ISL_476393, EPI_ISL_476394, EPI_ISL_476395, EPI_ISL_476396, EPI_ISL_476397, EPI_ISL_476398, EPI_ISL_476399, EPI_ISL_476400, EPI_ISL_476401, EPI_ISL_476408, EPI_ISL_476410, EPI_ISL_476411, EPI_ISL_476413, EPI_ISL_476414, EPI_ISL_476415, EPI_ISL_476416, EPI_ISL_476417, EPI_ISL_476418, EPI_ISL_476419, EPI_ISL_476421, EPI_ISL_476423                                                                                                                                                                                                                                                                 | see above                                                                                                                                                                                                           | Laboratório de Patologia Clínica - UNICAMP                                                                                                          | Laboratório de Estudos de Virus Emergentes - UNICAMP                                                                                                                                                                                                                                                                                                                                                                                                                                                                                                                                                                                                                                       |
| EPI_ISL_476428, EPI_ISL_476430, EPI_ISL_476431, EPI_ISL_476433, EPI_ISL_476434, EPI_ISL_476436, EPI_ISL_476438, EPI_ISL_476440, EPI_ISL_476441, EPI_ISL_476442, EPI_ISL_476445, EPI_ISL_476446, EPI_ISL_476447, EPI_ISL_476448, EPI_ISL_476451, EPI_ISL_476452, EPI_ISL_476454, EPI_ISL_476455, EPI_ISL_476456, EPI_ISL_476457, EPI_ISL_476458, EPI_ISL_476460, EPI_ISL_476461, EPI_ISL_476462, EPI_ISL_476463, EPI_ISL_476464, EPI_ISL_476465, EPI_ISL_476466, EPI_ISL_476467, EPI_ISL_476468, EPI_ISL_476469, EPI_ISL_476471, EPI_ISL_476473, EPI_ISL_476475, EPI_ISL_476476, EPI_ISL_476477, EPI_ISL_476479, EPI_ISL_476480, EPI_ISL_476481, EPI_ISL_476482, EPI_ISL_476488, EPI_ISL_476489 | see above                                                                                                                                                                                                           | Hospital da Clínicas da Faculdade de Medicina da Universidade de São Paulo                                                                          | Instituto de Medicina Tropical da Univesidade de São Paulo                                                                                                                                                                                                                                                                                                                                                                                                                                                                                                                                                                                                                                 |
| EPI_ISL_478094, EPI_ISL_478111                                                                                                                                                                                                                                                                                                                                                                                                                                                                                                                                                                                                                                                                 | West of Scotland Specialist Virology Centre, NHSGGC / MRC-University of Glasgow Centre for Virus Research                                                                                                           | COVID-19 Genomics UK (COG-UK) Consortium                                                                                                            | Ana da Silva Filipe, Natasha Johnson, Kathy Smollett, Daniel Mair, Stephen Carmichael, Lily Tong, Jenna Nichols, Elihu Aranday-Cortes, Kirstyn Brunker, Yasmin Parr, Alice Broos, Kyriaki Nomikou; Sarah McDonald, Marc Niebel, Patawee Asamaphan; Richard Orton, Joseph Hughes, Sreenu Vattipally, David L Robertson; Alasdair MacLean, Rory Gunson; Kathy Li, Natasha Jesudason, Rajiv Shah, James Shepherd, Antonia Ho, Emma Thomson                                                                                                                                                                                                                                                    |
| EPI_ISL_478249                                                                                                                                                                                                                                                                                                                                                                                                                                                                                                                                                                                                                                                                                 | Virology Department, Royal Infirmary of Edinburgh, NHS Lothian / School of Biological Sciences, University of Edinburgh / Institute of Genetics and Molecular Medicine, University of Edinburgh                     | COVID-19 Genomics UK (COG-UK) Consortium                                                                                                            | McHugh M, Dewar R, Rooke S, Gallagher M, Balcaza C, O'Toole Á, Scher E, Hill V, McCrone JT, Colquhoun R, Yu X, Jackson B, Rambaut A, Williams TC, Templeton K                                                                                                                                                                                                                                                                                                                                                                                                                                                                                                                              |
| EPI_ISL_486429                                                                                                                                                                                                                                                                                                                                                                                                                                                                                                                                                                                                                                                                                 | unknown                                                                                                                                                                                                             | Clinical Laboratory, Hospital Israelita Albert Einstein                                                                                             | Malta,F., Amgarten,D., Guedes,R.L., Santana,R.A., de Menezes,F.G., Manguiera,C.L. and Pinho,J.R.                                                                                                                                                                                                                                                                                                                                                                                                                                                                                                                                                                                           |
| EPI_ISL_488053                                                                                                                                                                                                                                                                                                                                                                                                                                                                                                                                                                                                                                                                                 | NU-OMICS DNA Sequencing research facility, Northumbria University                                                                                                                                                   | Wellcome Sanger Institute for the COVID-19 Genomics UK (COG-UK) consortium                                                                          | Chris Duncan, Shea Waugh, Shirelle Burton-Fanning, Gary Eltringham, Jennifer Collins, Brendan Payne, Yusri Taha, Emma Swindells, Jane Greenaway, Edward Barton, Garren Scott, Debra Padgett, Clive Graham, Sarah Essex, Steve Liggett, Paul Baker, Lynn Dover, Wen Yew, Gary Black, John Allan, Joshua Loh, Greg Young, Matthew Bashton, Andrew Nelson, Darren Smith and Alex Alderton, Roberto Amato, Sonia Goncalves, Ewan Harrison, David K. Jackson, Ian Johnston, Dominic Kwiatkowski, Cordelia Langford, John Sillitoe on behalf of the Wellcome Sanger Institute COVID-19 Surveillance Team ( <a href="http://www.sanger.ac.uk/covid-team">http://www.sanger.ac.uk/covid-team</a> ) |
| EPI_ISL_490026                                                                                                                                                                                                                                                                                                                                                                                                                                                                                                                                                                                                                                                                                 | South Eastern Area Laboratory Services (SEALS)                                                                                                                                                                      | NSW Health Pathology - Institute of Clinical Pathology and Medical Research; Westmead Hospital; University of Sydney                                | CIDM-PH et al.                                                                                                                                                                                                                                                                                                                                                                                                                                                                                                                                                                                                                                                                             |
| EPI_ISL_490482                                                                                                                                                                                                                                                                                                                                                                                                                                                                                                                                                                                                                                                                                 | Northumbria University / South Tees Hospitals NHS Foundation Trust / North Cumbria Integrated Care NHS Foundation Trust / North Tees and Hartlepool NHS Foundation Trust / Newcastle Hospitals NHS Foundation Trust | COVID-19 Genomics UK (COG-UK) Consortium                                                                                                            | Darren L Smith, Andrew Nelson, Matthew Bashton, Greg R Young, Joshua Loh, John Allan, Mohammad A Tariq, Giles S Holt, Gary Black, Wen C Yew, Lynn Dover, Paul Baker, Steve Liggett, Sarah Essex, Jane Greenaway, Debra Padgett, Clive Graham, Garren Scott, Edward Barton, Emma Swindells, Brendan Payne, Jennifer Collins, Yusri Taha, Gary Eltringham                                                                                                                                                                                                                                                                                                                                    |
| EPI_ISL_492036                                                                                                                                                                                                                                                                                                                                                                                                                                                                                                                                                                                                                                                                                 | Instituto de Biologia do Exército                                                                                                                                                                                   | Laboratório Metabolismo Macromolecular Firmino Torres de Castro, Instituto de Biofísica Carlos Chagas Filho, Universidade Federal do Rio de Janeiro | Bianca Catarina Azevedo Cabral, Aline Rosa Vianna de Souza , Marcos Domelas-Ribeiro, Tatiana LS Nogueira, Nádia Vaez Gonçalves da Cruz, Caleb GM Santos, Elizabeth Valentin, Marcio da Costa Cipitelli, Virginia Sara Gracieri do Amaral, Rodrigo Soares de Moura Neto, Clarissa Damaso, Rosane Silva                                                                                                                                                                                                                                                                                                                                                                                      |
| EPI_ISL_493851, EPI_ISL_493852, EPI_ISL_493868                                                                                                                                                                                                                                                                                                                                                                                                                                                                                                                                                                                                                                                 | West of Scotland Specialist Virology Centre, NHSGGC / MRC-University of Glasgow Centre for Virus Research                                                                                                           | COVID-19 Genomics UK (COG-UK) Consortium                                                                                                            | Ana da Silva Filipe, Natasha Johnson, Kathy Smollett, Daniel Mair, Stephen Carmichael, Lily Tong, Jenna Nichols, Elihu Aranday-Cortes, Kirstyn Brunker, Yasmin Parr, Alice Broos, Kyriaki Nomikou; Sarah McDonald, Marc Niebel, Patawee Asamaphan; Richard Orton, Joseph Hughes, Sreenu Vattipally, David L Robertson; Alasdair MacLean, Rory Gunson; Kathy Li, Natasha Jesudason, Rajiv Shah, James Shepherd, Antonia Ho, Emma Thomson                                                                                                                                                                                                                                                    |
| EPI_ISL_500483, EPI_ISL_500875                                                                                                                                                                                                                                                                                                                                                                                                                                                                                                                                                                                                                                                                 | LACEN/PE                                                                                                                                                                                                            | WallauLab, Aggeu Magalhaes Institute                                                                                                                | Marcelo Henrique Santos Paiva, Duschinka Ribeiro Duarte Guedes, Cássia Docena, Matheus Figueira Bezerra, Filipe Zimmer Dezordi, Laís Ceschini                                                                                                                                                                                                                                                                                                                                                                                                                                                                                                                                              |

|                                                                                |                                                                                                         |                                                                                                         |                                                                                                                                                                                                                                                                                                                                                                                                                                                                                                                                                                                                                                                                                                          |
|--------------------------------------------------------------------------------|---------------------------------------------------------------------------------------------------------|---------------------------------------------------------------------------------------------------------|----------------------------------------------------------------------------------------------------------------------------------------------------------------------------------------------------------------------------------------------------------------------------------------------------------------------------------------------------------------------------------------------------------------------------------------------------------------------------------------------------------------------------------------------------------------------------------------------------------------------------------------------------------------------------------------------------------|
|                                                                                |                                                                                                         |                                                                                                         | Machado, Larissa Krokovsky, Elisama Helvecio, Alexandre Freitas da Silva, Luydson Richardson Silva Vasconcelos, Antonio Mauro Rezende, Severino Jefferson Ribeiro da Silva, Kamila Gaudêncio da Silva Sales, Bruna Santos Lima Figueiredo de Sá, Derciliano Lopes da Cruz, Claudio Eduardo Cavalcanti, Armando de Menezes Neto, Caroline Targino Alves da Silva, Renata Pessôa Germano Mendes, Maria Almerice Lopes da Silva, Tiago Gräf, Paola Cristina Resende, Gonzalo Bello, Michelle da Silva Barros, Wheverton Ricardo Correia do Nascimento, Rodrigo Moraes Loyo Arcoverde, Luciane Caroline Albuquerque Bezerra, Sival Pinto Brandão Filho, Constança Flávia Junqueira Ayres, Gabriel Luz Wallau |
| EPI_ISL_502875                                                                 | LACEN/PE                                                                                                | LABBE, Federal University of Pernambuco                                                                 | WILSON JOSE DA SILVA JUNIOR, HEIDI LACERDA ALVES DA CRUZ, MARCOS DA SILVEIRA REGUEIRA NETO, BRUNO SAMPAIO, SERGIO DE SA LEITAO PAIVA JUNIOR, ZILDENE DE SOUSA SILVEIRA, MAIRA GALDINO DA ROCHA PITTA, MICHELLY CRISTINY PEREIRA, REGINALDO GONCALVES DE LIMA NETO, MARCOS ANTONIO DE MORAIS JUNIOR, ANTONIO CARLOS DE FREITAS, VALDIR DE QUEIROZ BALBINO.                                                                                                                                                                                                                                                                                                                                                |
| EPI_ISL_508266                                                                 | Government Medical College                                                                              | National Institute of Biomedical Genomics                                                               | Arindam Maitra, Jyoti Iravane, Dhaval Khatri, Maitrik Dave, Saumitra Das                                                                                                                                                                                                                                                                                                                                                                                                                                                                                                                                                                                                                                 |
| EPI_ISL_511103                                                                 | Instituto Nacional de Saude (INSA)                                                                      | Instituto Nacional de Saude (INSA)                                                                      | Borges et al                                                                                                                                                                                                                                                                                                                                                                                                                                                                                                                                                                                                                                                                                             |
| EPI_ISL_513514, EPI_ISL_513532, EPI_ISL_513546, EPI_ISL_513557, EPI_ISL_513578 | Programa de Oncovirologia, Instituto Nacional de Câncer                                                 | Programa de Oncovirologia, Instituto Nacional de Câncer                                                 | Juliana D. Siqueira, Livia R. Goes, Brunna M. Alves, Claudia Cicala, James Arthos, João P.B. Viola, Andreia C. de Melo, Marcelo A. Soares                                                                                                                                                                                                                                                                                                                                                                                                                                                                                                                                                                |
| EPI_ISL_515520                                                                 | Hospital Municipal do Tatuape Carmino Caricchio                                                         | Instituto Adolfo Lutz, Interdisciplinary Procedures Center, Strategic Laboratory                        | Claudio Tavares Sacchi, Claudia Regina Gonçalves, Erica Valessa Ramos Gomes                                                                                                                                                                                                                                                                                                                                                                                                                                                                                                                                                                                                                              |
| EPI_ISL_515524                                                                 | PS Municipal Dr Lauro Ribas Braga                                                                       | Instituto Adolfo Lutz, Interdisciplinary Procedures Center, Strategic Laboratory                        | Claudio Tavares Sacchi, Claudia Regina Gonçalves, Erica Valessa Ramos Gomes                                                                                                                                                                                                                                                                                                                                                                                                                                                                                                                                                                                                                              |
| EPI_ISL_515526                                                                 | Hospital Municipal do Tatuape Carmino Caricchio                                                         | Instituto Adolfo Lutz, Interdisciplinary Procedures Center, Strategic Laboratory                        | Claudio Tavares Sacchi, Claudia Regina Gonçalves, Erica Valessa Ramos Gomes                                                                                                                                                                                                                                                                                                                                                                                                                                                                                                                                                                                                                              |
| EPI_ISL_515529                                                                 | Pronto Socorro Municipal Julio Tupy                                                                     | Instituto Adolfo Lutz, Interdisciplinary Procedures Center, Strategic Laboratory                        | Claudio Tavares Sacchi, Claudia Regina Gonçalves, Erica Valessa Ramos Gomes                                                                                                                                                                                                                                                                                                                                                                                                                                                                                                                                                                                                                              |
| EPI_ISL_515541                                                                 | Hospital Montemagno                                                                                     | Instituto Adolfo Lutz, Interdisciplinary Procedures Center, Strategic Laboratory                        | Claudio Tavares Sacchi, Claudia Regina Gonçalves, Erica Valessa Ramos Gomes                                                                                                                                                                                                                                                                                                                                                                                                                                                                                                                                                                                                                              |
| EPI_ISL_515544                                                                 | Ama Dr Jose Soares Hungria                                                                              | Instituto Adolfo Lutz, Interdisciplinary Procedures Center, Strategic Laboratory                        | Claudio Tavares Sacchi, Claudia Regina Gonçalves, Erica Valessa Ramos Gomes                                                                                                                                                                                                                                                                                                                                                                                                                                                                                                                                                                                                                              |
| EPI_ISL_515547                                                                 | Centro Medico da Policia Militar do Estado de Sao Paulo                                                 | Instituto Adolfo Lutz, Interdisciplinary Procedures Center, Strategic Laboratory                        | Claudio Tavares Sacchi, Claudia Regina Gonçalves, Erica Valessa Ramos Gomes                                                                                                                                                                                                                                                                                                                                                                                                                                                                                                                                                                                                                              |
| EPI_ISL_515548                                                                 | Hospital Municipal Dr. Jose Soares Hungria                                                              | Instituto Adolfo Lutz, Interdisciplinary Procedures Center, Strategic Laboratory                        | Claudio Tavares Sacchi, Claudia Regina Gonçalves, Erica Valessa Ramos Gomes                                                                                                                                                                                                                                                                                                                                                                                                                                                                                                                                                                                                                              |
| EPI_ISL_515551, EPI_ISL_515552                                                 | Hospital Municipal do Tatuape Carmino Caricchio                                                         | Instituto Adolfo Lutz, Interdisciplinary Procedures Center, Strategic Laboratory                        | Claudio Tavares Sacchi, Claudia Regina Gonçalves, Erica Valessa Ramos Gomes                                                                                                                                                                                                                                                                                                                                                                                                                                                                                                                                                                                                                              |
| EPI_ISL_515553                                                                 | Hospital Municipal Dr. Ignacio Proença de Gouvea                                                        | Instituto Adolfo Lutz, Interdisciplinary Procedures Center, Strategic Laboratory                        | Claudio Tavares Sacchi, Claudia Regina Gonçalves, Erica Valessa Ramos Gomes                                                                                                                                                                                                                                                                                                                                                                                                                                                                                                                                                                                                                              |
| EPI_ISL_515554                                                                 | Pronto Socorro Municipal de Perus                                                                       | Instituto Adolfo Lutz, Interdisciplinary Procedures Center, Strategic Laboratory                        | Claudio Tavares Sacchi, Claudia Regina Gonçalves, Erica Valessa Ramos Gomes                                                                                                                                                                                                                                                                                                                                                                                                                                                                                                                                                                                                                              |
| EPI_ISL_515555                                                                 | Hospital Geral de Vila Nova Cachoeirinha                                                                | Instituto Adolfo Lutz, Interdisciplinary Procedures Center, Strategic Laboratory                        | Claudio Tavares Sacchi, Claudia Regina Gonçalves, Erica Valessa Ramos Gomes                                                                                                                                                                                                                                                                                                                                                                                                                                                                                                                                                                                                                              |
| EPI_ISL_515559                                                                 | Hospital Sao Paulo de Ensino da Unifesp                                                                 | Instituto Adolfo Lutz, Interdisciplinary Procedures Center, Strategic Laboratory                        | Claudio Tavares Sacchi, Claudia Regina Gonçalves, Erica Valessa Ramos Gomes                                                                                                                                                                                                                                                                                                                                                                                                                                                                                                                                                                                                                              |
| EPI_ISL_515561                                                                 | Hospital Montemagno                                                                                     | Instituto Adolfo Lutz, Interdisciplinary Procedures Center, Strategic Laboratory                        | Claudio Tavares Sacchi, Claudia Regina Gonçalves, Erica Valessa Ramos Gomes                                                                                                                                                                                                                                                                                                                                                                                                                                                                                                                                                                                                                              |
| EPI_ISL_515562                                                                 | Hospital Municipal Doutor Alexandre Zaio                                                                | Instituto Adolfo Lutz, Interdisciplinary Procedures Center, Strategic Laboratory                        | Claudio Tavares Sacchi, Claudia Regina Gonçalves, Erica Valessa Ramos Gomes                                                                                                                                                                                                                                                                                                                                                                                                                                                                                                                                                                                                                              |
| EPI_ISL_515563                                                                 | Hospital Municipal Dr. Jose Soares Hungria                                                              | Instituto Adolfo Lutz, Interdisciplinary Procedures Center, Strategic Laboratory                        | Claudio Tavares Sacchi, Claudia Regina Gonçalves, Erica Valessa Ramos Gomes                                                                                                                                                                                                                                                                                                                                                                                                                                                                                                                                                                                                                              |
| EPI_ISL_515565                                                                 | Hospital do Servidor Público Estadual Francisco Morato de Oliveira                                      | Instituto Adolfo Lutz, Interdisciplinary Procedures Center, Strategic Laboratory                        | Claudio Tavares Sacchi, Claudia Regina Gonçalves, Erica Valessa Ramos Gomes                                                                                                                                                                                                                                                                                                                                                                                                                                                                                                                                                                                                                              |
| EPI_ISL_515566                                                                 | PS Municipal Dr Lauro Ribas Braga                                                                       | Instituto Adolfo Lutz, Interdisciplinary Procedures Center, Strategic Laboratory                        | Claudio Tavares Sacchi, Claudia Regina Gonçalves, Erica Valessa Ramos Gomes                                                                                                                                                                                                                                                                                                                                                                                                                                                                                                                                                                                                                              |
| EPI_ISL_522491                                                                 | Center for Laboratory Control of Infectious Diseases, Korea Centers for Diseases Control and Prevention | Center for Laboratory Control of Infectious Diseases, Korea Centers for Diseases Control and Prevention | Junyoung Kim, Ae Kyung Park, Eunkyung Shin, Jin Sun No, Jeong-Min Kim, Yoon-Seok Chung, Heui Man Kim, Myung Guk Han                                                                                                                                                                                                                                                                                                                                                                                                                                                                                                                                                                                      |
| EPI_ISL_523955                                                                 | Hospital Municipal do Tatuape Carmino Caricchio                                                         | Instituto Adolfo Lutz, Interdisciplinary Procedures Center, Strategic Laboratory                        | Claudio Tavares Sacchi, Claudia Regina Gonçalves, Erica Valessa Ramos Gomes                                                                                                                                                                                                                                                                                                                                                                                                                                                                                                                                                                                                                              |
| EPI_ISL_523957                                                                 | Hospital Itamaraty                                                                                      | Instituto Adolfo Lutz, Interdisciplinary Procedures Center, Strategic Laboratory                        | Claudio Tavares Sacchi, Claudia Regina Gonçalves, Erica Valessa Ramos Gomes                                                                                                                                                                                                                                                                                                                                                                                                                                                                                                                                                                                                                              |
| EPI_ISL_523958                                                                 | Pronto Socorro Municipal de Perus                                                                       | Instituto Adolfo Lutz, Interdisciplinary Procedures Center, Strategic Laboratory                        | Claudio Tavares Sacchi, Claudia Regina Gonçalves, Erica Valessa Ramos Gomes                                                                                                                                                                                                                                                                                                                                                                                                                                                                                                                                                                                                                              |
| EPI_ISL_523965                                                                 | Hospital do Servidor Público Estadual Francisco Morato de Oliveira                                      | Instituto Adolfo Lutz, Interdisciplinary Procedures Center, Strategic Laboratory                        | Claudio Tavares Sacchi, Claudia Regina Gonçalves, Erica Valessa Ramos Gomes                                                                                                                                                                                                                                                                                                                                                                                                                                                                                                                                                                                                                              |
| EPI_ISL_523969                                                                 | Hospital Sao Paulo de Ensino da Unifesp                                                                 | Instituto Adolfo Lutz, Interdisciplinary Procedures Center, Strategic Laboratory                        | Claudio Tavares Sacchi, Claudia Regina Gonçalves, Erica Valessa Ramos Gomes                                                                                                                                                                                                                                                                                                                                                                                                                                                                                                                                                                                                                              |
| EPI_ISL_523970                                                                 | Conjunto Hospitalar do Mandaqui                                                                         | Instituto Adolfo Lutz, Interdisciplinary Procedures Center, Strategic Laboratory                        | Claudio Tavares Sacchi, Claudia Regina Gonçalves, Erica Valessa Ramos Gomes                                                                                                                                                                                                                                                                                                                                                                                                                                                                                                                                                                                                                              |
| EPI_ISL_523971                                                                 | Hospital Geral Santa Marcelina                                                                          | Instituto Adolfo Lutz, Interdisciplinary Procedures Center, Strategic Laboratory                        | Claudio Tavares Sacchi, Claudia Regina Gonçalves, Erica Valessa Ramos Gomes                                                                                                                                                                                                                                                                                                                                                                                                                                                                                                                                                                                                                              |
| EPI_ISL_523974                                                                 | Hospital Municipal do Tatuape Carmino Caricchio                                                         | Instituto Adolfo Lutz, Interdisciplinary Procedures Center, Strategic Laboratory                        | Claudio Tavares Sacchi, Claudia Regina Gonçalves, Erica Valessa Ramos Gomes                                                                                                                                                                                                                                                                                                                                                                                                                                                                                                                                                                                                                              |
| EPI_ISL_523975                                                                 | UPA Tito Lopes                                                                                          | Instituto Adolfo Lutz, Interdisciplinary Procedures Center, Strategic Laboratory                        | Claudio Tavares Sacchi, Claudia Regina Gonçalves, Erica Valessa Ramos Gomes                                                                                                                                                                                                                                                                                                                                                                                                                                                                                                                                                                                                                              |
| EPI_ISL_523977                                                                 | Hosp. Municipal Prof. Dr. Alípio Corrêa Netto                                                           | Instituto Adolfo Lutz, Interdisciplinary Procedures Center, Strategic Laboratory                        | Claudio Tavares Sacchi, Claudia Regina Gonçalves, Erica Valessa Ramos Gomes                                                                                                                                                                                                                                                                                                                                                                                                                                                                                                                                                                                                                              |

|                                                                |                                                                                                     |                                                                                                     |                                                                                                                                                                                                                                       |
|----------------------------------------------------------------|-----------------------------------------------------------------------------------------------------|-----------------------------------------------------------------------------------------------------|---------------------------------------------------------------------------------------------------------------------------------------------------------------------------------------------------------------------------------------|
| EPI_ISL_523978                                                 | Hospital do Servidor Público Estadual Francisco Morato de Oliveira                                  | Instituto Adolfo Lutz, Interdisciplinary Procedures Center, Strategic Laboratory                    | Claudio Tavares Sacchi, Claudia Regina Gonçalves, Erica Valessa Ramos Gomes                                                                                                                                                           |
| EPI_ISL_523980                                                 | UPA Tito Lopes                                                                                      | Instituto Adolfo Lutz, Interdisciplinary Procedures Center, Strategic Laboratory                    | Claudio Tavares Sacchi, Claudia Regina Gonçalves, Erica Valessa Ramos Gomes                                                                                                                                                           |
| EPI_ISL_523981                                                 | Hospital Sao Paulo de Ensino da Unifesp                                                             | Instituto Adolfo Lutz, Interdisciplinary Procedures Center, Strategic Laboratory                    | Claudio Tavares Sacchi, Claudia Regina Gonçalves, Erica Valessa Ramos Gomes                                                                                                                                                           |
| EPI_ISL_523982                                                 | Hospital do Servidor Público Estadual Francisco Morato de Oliveira                                  | Instituto Adolfo Lutz, Interdisciplinary Procedures Center, Strategic Laboratory                    | Claudio Tavares Sacchi, Claudia Regina Gonçalves, Erica Valessa Ramos Gomes                                                                                                                                                           |
| EPI_ISL_523983                                                 | UPA Campo Limpo                                                                                     | Instituto Adolfo Lutz, Interdisciplinary Procedures Center, Strategic Laboratory                    | Claudio Tavares Sacchi, Claudia Regina Gonçalves, Erica Valessa Ramos Gomes                                                                                                                                                           |
| EPI_ISL_523984, EPI_ISL_523986                                 | Ama Dr Jose Soares Hungria                                                                          | Instituto Adolfo Lutz, Interdisciplinary Procedures Center, Strategic Laboratory                    | Claudio Tavares Sacchi, Claudia Regina Gonçalves, Erica Valessa Ramos Gomes                                                                                                                                                           |
| EPI_ISL_523988                                                 | Hospital Sao Paulo de Ensino da Unifesp                                                             | Instituto Adolfo Lutz, Interdisciplinary Procedures Center, Strategic Laboratory                    | Claudio Tavares Sacchi, Claudia Regina Gonçalves, Erica Valessa Ramos Gomes                                                                                                                                                           |
| EPI_ISL_523989                                                 | AMA Jardim Joamar                                                                                   | Instituto Adolfo Lutz, Interdisciplinary Procedures Center, Strategic Laboratory                    | Claudio Tavares Sacchi, Claudia Regina Gonçalves, Erica Valessa Ramos Gomes                                                                                                                                                           |
| EPI_ISL_523990                                                 | AMA Jardim Peri                                                                                     | Instituto Adolfo Lutz, Interdisciplinary Procedures Center, Strategic Laboratory                    | Claudio Tavares Sacchi, Claudia Regina Gonçalves, Erica Valessa Ramos Gomes                                                                                                                                                           |
| EPI_ISL_524462                                                 | Hospital Metropolitan                                                                               | Instituto Adolfo Lutz, Interdisciplinary Procedures Center, Strategic Laboratory                    | Claudio Tavares Sacchi, Claudia Regina Gonçalves, Erica Valessa Ramos Gomes                                                                                                                                                           |
| EPI_ISL_524463                                                 | Hospital Regional de Cotia                                                                          | Instituto Adolfo Lutz, Interdisciplinary Procedures Center, Strategic Laboratory                    | Claudio Tavares Sacchi, Claudia Regina Gonçalves, Erica Valessa Ramos Gomes                                                                                                                                                           |
| EPI_ISL_524464                                                 | Santa Casa de Santa Isabel                                                                          | Instituto Adolfo Lutz, Interdisciplinary Procedures Center, Strategic Laboratory                    | Claudio Tavares Sacchi, Claudia Regina Gonçalves, Erica Valessa Ramos Gomes                                                                                                                                                           |
| EPI_ISL_524465                                                 | PS Municipal Dr. Caetano Virgilio Neto                                                              | Instituto Adolfo Lutz, Interdisciplinary Procedures Center, Strategic Laboratory                    | Claudio Tavares Sacchi, Claudia Regina Gonçalves, Erica Valessa Ramos Gomes                                                                                                                                                           |
| EPI_ISL_524466                                                 | PS Municipal Dr Lauro Ribas Braga                                                                   | Instituto Adolfo Lutz, Interdisciplinary Procedures Center, Strategic Laboratory                    | Claudio Tavares Sacchi, Claudia Regina Gonçalves, Erica Valessa Ramos Gomes                                                                                                                                                           |
| EPI_ISL_524468                                                 | Hospital Municipal Vereador Jose Storopoli                                                          | Instituto Adolfo Lutz, Interdisciplinary Procedures Center, Strategic Laboratory                    | Claudio Tavares Sacchi, Claudia Regina Gonçalves, Erica Valessa Ramos Gomes                                                                                                                                                           |
| EPI_ISL_524469                                                 | Santa Casa de Misericórdia de Sao Paulo                                                             | Instituto Adolfo Lutz, Interdisciplinary Procedures Center, Strategic Laboratory                    | Claudio Tavares Sacchi, Claudia Regina Gonçalves, Erica Valessa Ramos Gomes                                                                                                                                                           |
| EPI_ISL_524783, EPI_ISL_524785, EPI_ISL_524786, EPI_ISL_524787 | Evandro Chagas Institute                                                                            | Evandro Chagas Institute                                                                            | Santos, M.C.; Silva, A.M.; Junior, W.D.C.; Barbagelata, L.S.; Ferreira, J.A.; Sousa, E.M.A.; da Silva, P.S.; Resque, H.R; Martins, L.C.; Sousa Junior, E.C.; Viana, G.M.R                                                             |
| EPI_ISL_526282                                                 | Unity Health Toronto                                                                                | Ontario Institute for Cancer Research                                                               | Ramzi Fattouh, Larissa M. Matukas, Mark Downing, Annette Gower, Karel Boissinot, Samira Mubareka, TIBDN, Ilnca Lungu, Bernard Lam, Jeremy Johns, Paul Krzyzanowski, Richard de Borja, Felicia Vincelli, Philip Zuzarte, Jared Simpson |
| EPI_ISL_527019, EPI_ISL_527032                                 | Area of Virology, Serology and Virology Division (SAVID), New South Wales Health Pathology Randwick | Area of Virology, Serology and Virology Division (SAVID), New South Wales Health Pathology Randwick | Rawlinson, W.                                                                                                                                                                                                                         |
| EPI_ISL_527856                                                 | Hospital Municipal Prof. Waldomiro de Paula                                                         | Instituto Adolfo Lutz, Interdisciplinary Procedures Center, Strategic Laboratory                    | Claudio Tavares Sacchi, Claudia Regina Gonçalves, Erica Valessa Ramos Gomes                                                                                                                                                           |
| EPI_ISL_527857                                                 | Hospital Regional Vale do Ribeira                                                                   | Instituto Adolfo Lutz, Interdisciplinary Procedures Center, Strategic Laboratory                    | Claudio Tavares Sacchi, Claudia Regina Gonçalves, Erica Valessa Ramos Gomes                                                                                                                                                           |
| EPI_ISL_527859                                                 | Hospital Municipal Vereador Jose Storopoli                                                          | Instituto Adolfo Lutz, Interdisciplinary Procedures Center, Strategic Laboratory                    | Claudio Tavares Sacchi, Claudia Regina Gonçalves, Erica Valessa Ramos Gomes                                                                                                                                                           |
| EPI_ISL_527860                                                 | Hospital Municipal de Parelheiros Josanias Castanha Braga                                           | Instituto Adolfo Lutz, Interdisciplinary Procedures Center, Strategic Laboratory                    | Claudio Tavares Sacchi, Claudia Regina Gonçalves, Erica Valessa Ramos Gomes                                                                                                                                                           |
| EPI_ISL_527861                                                 | Hospital e Maternidade Celso Pierro                                                                 | Instituto Adolfo Lutz, Interdisciplinary Procedures Center, Strategic Laboratory                    | Av. Dr. Arnaldo, 355 - Brazil, Cerqueira Cesar, São Paulo - SP, 01246-1301                                                                                                                                                            |
| EPI_ISL_527862                                                 | Hospital Municipal de Urgência                                                                      | Instituto Adolfo Lutz, Interdisciplinary Procedures Center, Strategic Laboratory                    | Claudio Tavares Sacchi, Claudia Regina Gonçalves, Erica Valessa Ramos Gomes                                                                                                                                                           |
| EPI_ISL_527865                                                 | Hospital e Maternidade São Cristóvão                                                                | Instituto Adolfo Lutz, Interdisciplinary Procedures Center, Strategic Laboratory                    | Claudio Tavares Sacchi, Claudia Regina Gonçalves, Erica Valessa Ramos Gomes                                                                                                                                                           |
| EPI_ISL_527866                                                 | PS Municipal Dr Lauro Ribas Braga                                                                   | Instituto Adolfo Lutz, Interdisciplinary Procedures Center, Strategic Laboratory                    | Av. Dr. Arnaldo, 355 - Brazil, Cerqueira Cesar, São Paulo - SP, 01246-1301                                                                                                                                                            |
| EPI_ISL_527868                                                 | Hospital e Maternidade do Braz                                                                      | Instituto Adolfo Lutz, Interdisciplinary Procedures Center, Strategic Laboratory                    | Claudio Tavares Sacchi, Claudia Regina Gonçalves, Erica Valessa Ramos Gomes                                                                                                                                                           |
| EPI_ISL_527870                                                 | Hospital Municipal Mário Gatti                                                                      | Instituto Adolfo Lutz, Interdisciplinary Procedures Center, Strategic Laboratory                    | Claudio Tavares Sacchi, Claudia Regina Gonçalves, Erica Valessa Ramos Gomes                                                                                                                                                           |
| EPI_ISL_534311                                                 | UPA III 26 de Agosto                                                                                | Instituto Adolfo Lutz, Interdisciplinary Procedures Center, Strategic Laboratory                    | Claudio Tavares Sacchi, Claudia Regina Gonçalves, Erica Valessa Ramos Gomes                                                                                                                                                           |
| EPI_ISL_534314                                                 | Hospital Universitario da USP de SP                                                                 | Instituto Adolfo Lutz, Interdisciplinary Procedures Center, Strategic Laboratory                    | Claudio Tavares Sacchi, Claudia Regina Gonçalves, Erica Valessa Ramos Gomes                                                                                                                                                           |
| EPI_ISL_534316                                                 | OS Mun Santana Lauro Ribas Braga                                                                    | Instituto Adolfo Lutz, Interdisciplinary Procedures Center, Strategic Laboratory                    | Claudio Tavares Sacchi, Claudia Regina Gonçalves, Erica Valessa Ramos Gomes                                                                                                                                                           |
| EPI_ISL_534317                                                 | Hospital Geral de Itapevi                                                                           | Instituto Adolfo Lutz, Interdisciplinary Procedures Center, Strategic Laboratory                    | Claudio Tavares Sacchi, Claudia Regina Gonçalves, Erica Valessa Ramos Gomes                                                                                                                                                           |
| EPI_ISL_534318                                                 | Hospital Municipal Antonio Giglio                                                                   | Instituto Adolfo Lutz, Interdisciplinary Procedures Center, Strategic Laboratory                    | Claudio Tavares Sacchi, Claudia Regina Gonçalves, Erica Valessa Ramos Gomes                                                                                                                                                           |
| EPI_ISL_534319, EPI_ISL_534320                                 | Hospital do Serv Pub ESTAFCO Morato de Oliveira                                                     | Instituto Adolfo Lutz, Interdisciplinary Procedures Center, Strategic Laboratory                    | Claudio Tavares Sacchi, Claudia Regina Gonçalves, Erica Valessa Ramos Gomes                                                                                                                                                           |

|                                                                |                                                                                           |                                                                                  |                                                                                                                                                                                                                                                                                                                                                                                                                                                                                                                                                                                                                                                                                                                                                                                                                                                          |
|----------------------------------------------------------------|-------------------------------------------------------------------------------------------|----------------------------------------------------------------------------------|----------------------------------------------------------------------------------------------------------------------------------------------------------------------------------------------------------------------------------------------------------------------------------------------------------------------------------------------------------------------------------------------------------------------------------------------------------------------------------------------------------------------------------------------------------------------------------------------------------------------------------------------------------------------------------------------------------------------------------------------------------------------------------------------------------------------------------------------------------|
| EPI_ISL_534321                                                 | PS e Maternidade Nair Fonseca Leitao Arantes                                              | Instituto Adolfo Lutz, Interdisciplinary Procedures Center, Strategic Laboratory | Claudio Tavares Sacchi, Claudia Regina Gonçalves, Erica Valessa Ramos Gomes                                                                                                                                                                                                                                                                                                                                                                                                                                                                                                                                                                                                                                                                                                                                                                              |
| EPI_ISL_534322                                                 | PS Mun Julio Tupy                                                                         | Instituto Adolfo Lutz, Interdisciplinary Procedures Center, Strategic Laboratory | Claudio Tavares Sacchi, Claudia Regina Gonçalves, Erica Valessa Ramos Gomes                                                                                                                                                                                                                                                                                                                                                                                                                                                                                                                                                                                                                                                                                                                                                                              |
| EPI_ISL_534326                                                 | Notre Dame Intermedica Saude AS                                                           | Instituto Adolfo Lutz, Interdisciplinary Procedures Center, Strategic Laboratory | Claudio Tavares Sacchi, Claudia Regina Gonçalves, Erica Valessa Ramos Gomes                                                                                                                                                                                                                                                                                                                                                                                                                                                                                                                                                                                                                                                                                                                                                                              |
| EPI_ISL_536688                                                 | University of Wisconsin-Madison AIDS Vaccine Research Laboratories                        | University of Wisconsin-Madison AIDS Vaccine Research Laboratories               | Gage Moreno, Katarina Braun, et al. AIDS Vaccine Research Laboratories                                                                                                                                                                                                                                                                                                                                                                                                                                                                                                                                                                                                                                                                                                                                                                                   |
| EPI_ISL_541343, EPI_ISL_541344                                 | LACEN/PR                                                                                  | Laboratory of Respiratory Viruses and Measles, Oswaldo Cruz Institute, FIOCRUZ   | Paola Resende, Luciana Appolinario, Fernando Motta, Anna Carolina Paixão, Ana Carolina Mendonça, Jonathan Lopes, Irina Riediger, Maria do Carmo Debur, Marilda Siqueira                                                                                                                                                                                                                                                                                                                                                                                                                                                                                                                                                                                                                                                                                  |
| EPI_ISL_541354, EPI_ISL_541355, EPI_ISL_541359                 | Laboratory of Respiratory Viruses and Measles, Oswaldo Cruz Institute, FIOCRUZ            | Laboratory of Respiratory Viruses and Measles, Oswaldo Cruz Institute, FIOCRUZ   | Paola Resende, Luciana Appolinario, Fernando Motta, Anna Carolina Paixão, Ana Carolina Mendonça, Jonathan Lopes, Marilda Siqueira                                                                                                                                                                                                                                                                                                                                                                                                                                                                                                                                                                                                                                                                                                                        |
| EPI_ISL_541372, EPI_ISL_541386                                 | LACEN/SE                                                                                  | Laboratory of Respiratory Viruses and Measles, Oswaldo Cruz Institute, FIOCRUZ   | Paola Resende, Luciana Appolinario, Fernando Motta, Anna Carolina Paixão, Ana Carolina Mendonça, Jonathan Lopes, Cliona Santos, Marilda Siqueira                                                                                                                                                                                                                                                                                                                                                                                                                                                                                                                                                                                                                                                                                                         |
| EPI_ISL_547433, EPI_ISL_547434, EPI_ISL_547435, EPI_ISL_547437 | Microbiology, Department of Pathology, St. Bernard's Hospital, Gibraltar Health Authority | Respiratory Virus Unit, Microbiology Services Colindale, Public Health England   | PHE Covid Sequencing Team, Dr Nicholas Cortes (Gibraltar), Charlotte Gillborn-Jones (Gibraltar)                                                                                                                                                                                                                                                                                                                                                                                                                                                                                                                                                                                                                                                                                                                                                          |
| EPI_ISL_547573                                                 | Vigilância em Saúde de Cajamar                                                            | Instituto Adolfo Lutz, Interdisciplinary Procedures Center, Strategic Laboratory | Claudio Tavares Sacchi, Claudia Regina Gonçalves, Erica Valessa Ramos Gomes, Karoline Rodrigues Campos                                                                                                                                                                                                                                                                                                                                                                                                                                                                                                                                                                                                                                                                                                                                                   |
| EPI_ISL_547575                                                 | SVO Jundiá                                                                                | Instituto Adolfo Lutz, Interdisciplinary Procedures Center, Strategic Laboratory | Claudio Tavares Sacchi, Claudia Regina Gonçalves, Erica Valessa Ramos Gomes, Karoline Rodrigues Campos                                                                                                                                                                                                                                                                                                                                                                                                                                                                                                                                                                                                                                                                                                                                                   |
| EPI_ISL_547579                                                 | Santa Casa de Misericórdia de Araçatuba                                                   | Instituto Adolfo Lutz, Interdisciplinary Procedures Center, Strategic Laboratory | Claudio Tavares Sacchi, Claudia Regina Gonçalves, Erica Valessa Ramos Gomes, Karoline Rodrigues Campos                                                                                                                                                                                                                                                                                                                                                                                                                                                                                                                                                                                                                                                                                                                                                   |
| EPI_ISL_547582                                                 | University of Wisconsin-Madison AIDS Vaccine Research Laboratories                        | University of Wisconsin-Madison AIDS Vaccine Research Laboratories               | Gage Moreno, Katarina Braun, et al. AIDS Vaccine Research Laboratories                                                                                                                                                                                                                                                                                                                                                                                                                                                                                                                                                                                                                                                                                                                                                                                   |
| EPI_ISL_549084                                                 | Akershus University Hospital, Department for Microbiology and Infectious Disease Control  | Norwegian Institute of Public Health, Department of Virology                     | Kathrine Stene-Johansen, Kamilla Heddeland Instefjord, Hilde Elshaug, Rasmus Riis Kopperud, Hilde Synnøve Vollen, Karoline Bragstad, Olav Hungnes                                                                                                                                                                                                                                                                                                                                                                                                                                                                                                                                                                                                                                                                                                        |
| EPI_ISL_549833                                                 | Lighthouse Lab in Milton Keynes                                                           | Wellcome Sanger Institute for the COVID-19 Genomics UK (COG-UK) consortium       | The Lighthouse Lab in Milton Keynes and Alex Alderton, Roberto Amato, Sonia Goncalves, Ewan Harrison, David K. Jackson, Ian Johnston, Dominic Kwiatkowski, Cordelia Langford, John Sillitoe on behalf of the Wellcome Sanger Institute COVID-19 Surveillance Team ( <a href="http://www.sanger.ac.uk/covid-team">http://www.sanger.ac.uk/covid-team</a> )                                                                                                                                                                                                                                                                                                                                                                                                                                                                                                |
| EPI_ISL_551467                                                 | Lighthouse Lab in Alderley Park                                                           | Wellcome Sanger Institute for the COVID-19 Genomics UK (COG-UK) consortium       | The Lighthouse Lab in Alderley Park and Alex Alderton, Roberto Amato, Sonia Goncalves, Ewan Harrison, David K. Jackson, Ian Johnston, Dominic Kwiatkowski, Cordelia Langford, John Sillitoe on behalf of the Wellcome Sanger Institute COVID-19 Surveillance Team ( <a href="http://www.sanger.ac.uk/covid-team">http://www.sanger.ac.uk/covid-team</a> )                                                                                                                                                                                                                                                                                                                                                                                                                                                                                                |
| EPI_ISL_572340, EPI_ISL_572371, EPI_ISL_572379                 | LACEN/PE                                                                                  | WallauLab, Aggeu Magalhaes Institute                                             | Marcelo Henrique Santos Paiva, Duschinka Ribeiro Duarte Guedes, Cássia Docena, Matheus Filgueira Bezerra, Filipe Zimmer Dezordi, Laís Ceschini Machado, Larissa Krokovsky, Elisama Helvecio, Alexandre Freitas da Silva, Luydson Richardson Silva Vasconcelos, Antonio Mauro Rezende, Severino Jefferson Ribeiro da Silva, Kamila Gaudêncio da Silva Sales, Bruna Santos Lima Figueiredo de Sá, Dercilano Lopes da Cruz, Claudio Eduardo Cavalcanti, Armando de Menezes Neto, Caroline Targino Alves da Silva, Renata Pessoa Germano Mendes, Maria Almerice Lopes da Silva, Tiago Gráf, Paola Cristina Resende, Gonzalo Belloó, Michelle da Silva Barros, Whererton Ricardo Correia do Nascimento, Rodrigo Moraes Loyo Arcoverde, Luciane Caroline Albuquerque Bezerra, Sival Pinto Brandão Filho, Constância Flávia Junqueira Ayres, Gabriel Luz Wallau |
| EPI_ISL_574577                                                 | Hospital Municipal Dr. Ignacio Proença de Gouvea                                          | Instituto Adolfo Lutz, Interdisciplinary Procedures Center, Strategic Laboratory | Claudio Tavares Sacchi, Claudia Regina Gonçalves, Erica Valessa Ramos Gomes, Karoline Rodrigues Campos                                                                                                                                                                                                                                                                                                                                                                                                                                                                                                                                                                                                                                                                                                                                                   |
| EPI_ISL_574578                                                 | Hospital Municipal Mário Gatti                                                            | Instituto Adolfo Lutz, Interdisciplinary Procedures Center, Strategic Laboratory | Claudio Tavares Sacchi, Claudia Regina Gonçalves, Erica Valessa Ramos Gomes, Karoline Rodrigues Campos                                                                                                                                                                                                                                                                                                                                                                                                                                                                                                                                                                                                                                                                                                                                                   |
| EPI_ISL_574579                                                 | Hospital Municipal Dr. Ignacio Proença de Gouvea                                          | Instituto Adolfo Lutz, Interdisciplinary Procedures Center, Strategic Laboratory | Claudio Tavares Sacchi, Claudia Regina Gonçalves, Erica Valessa Ramos Gomes, Karoline Rodrigues Campos                                                                                                                                                                                                                                                                                                                                                                                                                                                                                                                                                                                                                                                                                                                                                   |
| EPI_ISL_574580                                                 | Hospital Cidade Tiradentes Carmen Prudente                                                | Instituto Adolfo Lutz, Interdisciplinary Procedures Center, Strategic Laboratory | Claudio Tavares Sacchi, Claudia Regina Gonçalves, Erica Valessa Ramos Gomes, Karoline Rodrigues Campos                                                                                                                                                                                                                                                                                                                                                                                                                                                                                                                                                                                                                                                                                                                                                   |
| EPI_ISL_574582                                                 | Hospital Municipal Dr. Jose Soares Hungria                                                | Instituto Adolfo Lutz, Interdisciplinary Procedures Center, Strategic Laboratory | Claudio Tavares Sacchi, Claudia Regina Gonçalves, Erica Valessa Ramos Gomes, Karoline Rodrigues Campos                                                                                                                                                                                                                                                                                                                                                                                                                                                                                                                                                                                                                                                                                                                                                   |
| EPI_ISL_574583                                                 | Secretaria Municipal de Saude de Jandira                                                  | Instituto Adolfo Lutz, Interdisciplinary Procedures Center, Strategic Laboratory | Claudio Tavares Sacchi, Claudia Regina Gonçalves, Erica Valessa Ramos Gomes, Karoline Rodrigues Campos                                                                                                                                                                                                                                                                                                                                                                                                                                                                                                                                                                                                                                                                                                                                                   |
| EPI_ISL_574588                                                 | Hospital Estadual Sumare                                                                  | Instituto Adolfo Lutz, Interdisciplinary Procedures Center, Strategic Laboratory | Claudio Tavares Sacchi, Claudia Regina Gonçalves, Erica Valessa Ramos Gomes, Karoline Rodrigues Campos                                                                                                                                                                                                                                                                                                                                                                                                                                                                                                                                                                                                                                                                                                                                                   |
| EPI_ISL_574589                                                 | Hospital Municipal Dr. Jose Soares Hungria                                                | Instituto Adolfo Lutz, Interdisciplinary Procedures Center, Strategic Laboratory | Claudio Tavares Sacchi, Claudia Regina Gonçalves, Erica Valessa Ramos Gomes, Karoline Rodrigues Campos                                                                                                                                                                                                                                                                                                                                                                                                                                                                                                                                                                                                                                                                                                                                                   |
| EPI_ISL_574590                                                 | Unidade de Pronto Atendimento UPA I Santa Isabel                                          | Instituto Adolfo Lutz, Interdisciplinary Procedures Center, Strategic Laboratory | Claudio Tavares Sacchi, Claudia Regina Gonçalves, Erica Valessa Ramos Gomes, Karoline Rodrigues Campos                                                                                                                                                                                                                                                                                                                                                                                                                                                                                                                                                                                                                                                                                                                                                   |
| EPI_ISL_574591, EPI_ISL_574592                                 | Hospital Domingos Leonardo Ceravolo Presidente Prudente                                   | Instituto Adolfo Lutz, Interdisciplinary Procedures Center, Strategic Laboratory | Claudio Tavares Sacchi, Claudia Regina Gonçalves, Erica Valessa Ramos Gomes, Karoline Rodrigues Campos                                                                                                                                                                                                                                                                                                                                                                                                                                                                                                                                                                                                                                                                                                                                                   |
| EPI_ISL_574597                                                 | Secretaria Municipal de Saude de Jarinu                                                   | Instituto Adolfo Lutz, Interdisciplinary Procedures Center, Strategic Laboratory | Claudio Tavares Sacchi, Claudia Regina Gonçalves, Erica Valessa Ramos Gomes, Karoline Rodrigues Campos                                                                                                                                                                                                                                                                                                                                                                                                                                                                                                                                                                                                                                                                                                                                                   |
| EPI_ISL_574598                                                 | Servico de Verificacao de Obito SVO                                                       | Instituto Adolfo Lutz, Interdisciplinary Procedures Center, Strategic Laboratory | Claudio Tavares Sacchi, Claudia Regina Gonçalves, Erica Valessa Ramos Gomes, Karoline Rodrigues Campos                                                                                                                                                                                                                                                                                                                                                                                                                                                                                                                                                                                                                                                                                                                                                   |
| EPI_ISL_581117                                                 | Lighthouse Lab in Milton Keynes                                                           | Wellcome Sanger Institute for the COVID-19 Genomics UK (COG-UK) consortium       | The Lighthouse Lab in Milton Keynes and Alex Alderton, Roberto Amato, Sonia Goncalves, Ewan Harrison, David K. Jackson, Ian Johnston, Dominic Kwiatkowski, Cordelia Langford, John Sillitoe on behalf of the Wellcome Sanger Institute COVID-19 Surveillance Team                                                                                                                                                                                                                                                                                                                                                                                                                                                                                                                                                                                        |
| EPI_ISL_581703                                                 | University Hospital Basel, Clinical Virology                                              | University Hospital Basel, Clinical Bacteriology                                 | Madlen Stange, Alfredo Mari, Tim Roloff, Helena MB Seth-Smith, Michael Schweitzer, Myrta Brunner, Karoline Leuzinger, Kirstine K. Soegaard, Alexander Gensch, Sarah Tschudin-Sutter, Simon Fuchs, Julia Bielicki, Hans Pargger, Martin Siegemund, Christian Nickel, Roland Bingisser, Michael Osthoff, Stefano Bassetti, Rita Schneider-Silva, Manuel Battegay, Hans Hirsch, Adrian Egli                                                                                                                                                                                                                                                                                                                                                                                                                                                                 |
| EPI_ISL_582342                                                 | Cadham Provincial Laboratory                                                              | National Microbiology Laboratory (NML)                                           | Anna Majer, Shari Tyson, Grace Seo, Philip Mabon, Elsie Grudeski, Rhiannon Huzarewich, Russell Mandes, Anneliese Landgraff, Jennifer Tanner, Natalie Knox, Morag Graham, Gary Van Domselaar, Paul Van Caesele, Jared Bullard, David Alexander, Kerry Dust, Nathalie Bastien, Yan Li, Timothy Booth, Darian Hole, Madison Chapel, CanCOGen's metadata curation team, Public Health Agency of Canada CanCOGen team                                                                                                                                                                                                                                                                                                                                                                                                                                         |
| EPI_ISL_583490                                                 | Hospital Estadual Sumare                                                                  | Instituto Adolfo Lutz, Interdisciplinary Procedures Center, Strategic Laboratory | Claudio Tavares Sacchi, Claudia Regina Gonçalves, Erica Valessa Ramos Gomes, Karoline Rodrigues Campos                                                                                                                                                                                                                                                                                                                                                                                                                                                                                                                                                                                                                                                                                                                                                   |

|                                                |                                                                                                                                 |                                                                                                                                 |                                                                                                                                                                                                                                                                                                                                                                                                                       |
|------------------------------------------------|---------------------------------------------------------------------------------------------------------------------------------|---------------------------------------------------------------------------------------------------------------------------------|-----------------------------------------------------------------------------------------------------------------------------------------------------------------------------------------------------------------------------------------------------------------------------------------------------------------------------------------------------------------------------------------------------------------------|
| EPI_ISL_583492                                 | Santa Casa Anna Cintra                                                                                                          | Instituto Adolfo Lutz, Interdisciplinary Procedures Center, Strategic Laboratory                                                | Claudio Tavares Sacchi, Claudia Regina Gonçalves, Erica Valessa Ramos Gomes, Karoline Rodrigues Campos                                                                                                                                                                                                                                                                                                                |
| EPI_ISL_583494                                 | CS II Dr. Antonio Vicoso Moreira de Rezende Sumare                                                                              | Instituto Adolfo Lutz, Interdisciplinary Procedures Center, Strategic Laboratory                                                | Claudio Tavares Sacchi, Claudia Regina Gonçalves, Erica Valessa Ramos Gomes, Karoline Rodrigues Campos                                                                                                                                                                                                                                                                                                                |
| EPI_ISL_583496                                 | UPA Jandira                                                                                                                     | Instituto Adolfo Lutz, Interdisciplinary Procedures Center, Strategic Laboratory                                                | Claudio Tavares Sacchi, Claudia Regina Gonçalves, Erica Valessa Ramos Gomes, Karoline Rodrigues Campos                                                                                                                                                                                                                                                                                                                |
| EPI_ISL_583497                                 | Complexo Hospitalar Ouro Verde de Campinas                                                                                      | Instituto Adolfo Lutz, Interdisciplinary Procedures Center, Strategic Laboratory                                                | Claudio Tavares Sacchi, Claudia Regina Gonçalves, Erica Valessa Ramos Gomes, Karoline Rodrigues Campos                                                                                                                                                                                                                                                                                                                |
| EPI_ISL_583498                                 | Hospital Municipal Dr. Waldemar Tebaldi                                                                                         | Instituto Adolfo Lutz, Interdisciplinary Procedures Center, Strategic Laboratory                                                | Claudio Tavares Sacchi, Claudia Regina Gonçalves, Erica Valessa Ramos Gomes, Karoline Rodrigues Campos                                                                                                                                                                                                                                                                                                                |
| EPI_ISL_583500                                 | Centro de Saude I Tacito Leite de Carvalho e Silva                                                                              | Instituto Adolfo Lutz, Interdisciplinary Procedures Center, Strategic Laboratory                                                | Claudio Tavares Sacchi, Claudia Regina Gonçalves, Erica Valessa Ramos Gomes, Karoline Rodrigues Campos                                                                                                                                                                                                                                                                                                                |
| EPI_ISL_583502                                 | Serv de Vig Sanitaria Epidemio e CTRL de Zoonoses Guaruja                                                                       | Instituto Adolfo Lutz, Interdisciplinary Procedures Center, Strategic Laboratory                                                | Claudio Tavares Sacchi, Claudia Regina Gonçalves, Erica Valessa Ramos Gomes, Karoline Rodrigues Campos                                                                                                                                                                                                                                                                                                                |
| EPI_ISL_583503                                 | CTA Centro de Testagem e Aconselhamento                                                                                         | Instituto Adolfo Lutz, Interdisciplinary Procedures Center, Strategic Laboratory                                                | Claudio Tavares Sacchi, Claudia Regina Gonçalves, Erica Valessa Ramos Gomes, Karoline Rodrigues Campos                                                                                                                                                                                                                                                                                                                |
| EPI_ISL_583504, EPI_ISL_583505                 | Casa de Saude Stella Maris                                                                                                      | Instituto Adolfo Lutz, Interdisciplinary Procedures Center, Strategic Laboratory                                                | Claudio Tavares Sacchi, Claudia Regina Gonçalves, Erica Valessa Ramos Gomes, Karoline Rodrigues Campos                                                                                                                                                                                                                                                                                                                |
| EPI_ISL_590506, EPI_ISL_590564                 | Lighthouse Lab in Glasgow                                                                                                       | Wellcome Sanger Institute for the COVID-19 Genomics UK (COG-UK) consortium                                                      | Harper VanSteenhouse, Yumi Kasai, David Gray, Carol Clugston, Anna Dominiczak and Alex Alderton, Roberto Amato, Sonia Goncalves, Ewan Harrison, David K. Jackson, Ian Johnston, Dominic Kwiatkowski, Cordelia Langford, John Sillitoe on behalf of the Wellcome Sanger Institute COVID-19 Surveillance Team ( <a href="http://www.sanger.ac.uk/covid-team">http://www.sanger.ac.uk/covid-team</a> )<br>CIDM-PH et al. |
| EPI_ISL_593687, EPI_ISL_593698, EPI_ISL_593711 | South Eastern Area Laboratory Services (SEALS)                                                                                  | NSW Health Pathology - Institute of Clinical Pathology and Medical Research; Westmead Hospital; University of Sydney            |                                                                                                                                                                                                                                                                                                                                                                                                                       |
| EPI_ISL_596982                                 | Lighthouse Lab in Cambridge                                                                                                     | Wellcome Sanger Institute for the COVID-19 Genomics UK (COG-UK) consortium                                                      | Rob Howes, The Lighthouse Lab in Cambridge and Alex Alderton, Roberto Amato, Sonia Goncalves, Ewan Harrison, David K. Jackson, Ian Johnston, Dominic Kwiatkowski, Cordelia Langford, John Sillitoe on behalf of the Wellcome Sanger Institute COVID-19 Surveillance Team ( <a href="http://www.sanger.ac.uk/covid-team">http://www.sanger.ac.uk/covid-team</a> )                                                      |
| EPI_ISL_599956, EPI_ISL_601443                 | Lighthouse Lab in Milton Keynes                                                                                                 | Wellcome Sanger Institute for the COVID-19 Genomics UK (COG-UK) consortium                                                      | The Lighthouse Lab in Milton Keynes and Alex Alderton, Roberto Amato, Sonia Goncalves, Ewan Harrison, David K. Jackson, Ian Johnston, Dominic Kwiatkowski, Cordelia Langford, John Sillitoe on behalf of the Wellcome Sanger Institute COVID-19 Surveillance Team ( <a href="http://www.sanger.ac.uk/covid-team">http://www.sanger.ac.uk/covid-team</a> )                                                             |
| EPI_ISL_603022                                 | Departamento de Vigilância à Saúde                                                                                              | Instituto Adolfo Lutz, Interdisciplinary Procedures Center, Strategic Laboratory                                                | Claudio Tavares Sacchi, Claudia Regina Gonçalves, Erica Valessa Ramos Gomes, Karoline Rodrigues Campos                                                                                                                                                                                                                                                                                                                |
| EPI_ISL_603023                                 | Vigilância em Saúde Visa Sul                                                                                                    | Instituto Adolfo Lutz, Interdisciplinary Procedures Center, Strategic Laboratory                                                | Claudio Tavares Sacchi, Claudia Regina Gonçalves, Erica Valessa Ramos Gomes, Karoline Rodrigues Campos                                                                                                                                                                                                                                                                                                                |
| EPI_ISL_603024                                 | Santa Casa de Misericórdia de Araçatuba                                                                                         | Instituto Adolfo Lutz, Interdisciplinary Procedures Center, Strategic Laboratory                                                | Claudio Tavares Sacchi, Claudia Regina Gonçalves, Erica Valessa Ramos Gomes, Karoline Rodrigues Campos                                                                                                                                                                                                                                                                                                                |
| EPI_ISL_603028                                 | Hospital Municipal Santa Ana                                                                                                    | Instituto Adolfo Lutz, Interdisciplinary Procedures Center, Strategic Laboratory                                                | Claudio Tavares Sacchi, Claudia Regina Gonçalves, Erica Valessa Ramos Gomes, Karoline Rodrigues Campos                                                                                                                                                                                                                                                                                                                |
| EPI_ISL_603030                                 | Hospital Domingos Leonardo Ceravolo Presidente Prudente                                                                         | Instituto Adolfo Lutz, Interdisciplinary Procedures Center, Strategic Laboratory                                                | Claudio Tavares Sacchi, Claudia Regina Gonçalves, Erica Valessa Ramos Gomes, Karoline Rodrigues Campos                                                                                                                                                                                                                                                                                                                |
| EPI_ISL_603033                                 | Vigilancia Epidemiologica de São Bernardo do Campo                                                                              | Instituto Adolfo Lutz, Interdisciplinary Procedures Center, Strategic Laboratory                                                | Claudio Tavares Sacchi, Claudia Regina Gonçalves, Erica Valessa Ramos Gomes, Karoline Rodrigues Campos                                                                                                                                                                                                                                                                                                                |
| EPI_ISL_603034                                 | Departamento de Vigilância à Saúde                                                                                              | Instituto Adolfo Lutz, Interdisciplinary Procedures Center, Strategic Laboratory                                                | Claudio Tavares Sacchi, Claudia Regina Gonçalves, Erica Valessa Ramos Gomes, Karoline Rodrigues Campos                                                                                                                                                                                                                                                                                                                |
| EPI_ISL_603036                                 | Hospital Santa Ana                                                                                                              | Instituto Adolfo Lutz, Interdisciplinary Procedures Center, Strategic Laboratory                                                | Claudio Tavares Sacchi, Claudia Regina Gonçalves, Erica Valessa Ramos Gomes, Karoline Rodrigues Campos                                                                                                                                                                                                                                                                                                                |
| EPI_ISL_603037                                 | Hospital Geral de Pedreira                                                                                                      | Instituto Adolfo Lutz, Interdisciplinary Procedures Center, Strategic Laboratory                                                | Claudio Tavares Sacchi, Claudia Regina Gonçalves, Erica Valessa Ramos Gomes, Karoline Rodrigues Campos                                                                                                                                                                                                                                                                                                                |
| EPI_ISL_603038                                 | Santa Casa de Misericórdia de Araçatuba                                                                                         | Instituto Adolfo Lutz, Interdisciplinary Procedures Center, Strategic Laboratory                                                | Claudio Tavares Sacchi, Claudia Regina Gonçalves, Erica Valessa Ramos Gomes, Karoline Rodrigues Campos                                                                                                                                                                                                                                                                                                                |
| EPI_ISL_613964                                 | Laboratory of Molecular Biology, Blood Center of Ribeirão Preto, Faculty of Medicine of Ribeirão Preto, University of São Paulo | Laboratory of Molecular Biology, Blood Center of Ribeirão Preto, Faculty of Medicine of Ribeirão Preto, University of São Paulo | Svetoslav N Slavov, Marta Giovanetti, Vagner Fonseca, Elaine V Santos, Evandra S Rodrigues, Talita Adelino, Joilson Xavier, Glauco de Carvalho Pereira, Aparecida Y Yamamoto, Diego Villa Clé, Rodrigo T Calado; Dimas T Covas, Luiz CJ Alcantara, Simone Kashima                                                                                                                                                     |
| EPI_ISL_623130, EPI_ISL_623131                 | Laboratorio de Virologia Molecular / UFRJ                                                                                       | Bioinformatics Laboratory / LNCC                                                                                                | Carolina M Voloch, Ronaldo S Francisco Jr, Luiz G P de Almeida, Otavio J. Brustolini, Cynthia C Cardoso, Alexandra L Gerber, Ana Paula de C Guimarães, Diana Mariani, Covid19-UFRJ Workgroup, Luís Cristóvão Pôrto, Renato S Aguiar, Terezinha M P P Castifeiras, Orlando C. Ferreira, Amílcar Tanuri, Ana Tereza R de Vasconcelos                                                                                    |
| EPI_ISL_629164, EPI_ISL_630998, EPI_ISL_631036 | Lighthouse Lab in Milton Keynes                                                                                                 | Wellcome Sanger Institute for the COVID-19 Genomics UK (COG-UK) consortium                                                      | The Lighthouse Lab in Milton Keynes and Alex Alderton, Roberto Amato, Sonia Goncalves, Ewan Harrison, David K. Jackson, Ian Johnston, Dominic Kwiatkowski, Cordelia Langford, John Sillitoe on behalf of the Wellcome Sanger Institute COVID-19 Surveillance Team                                                                                                                                                     |
| EPI_ISL_637676, EPI_ISL_637811                 | Department of Pathology, University of Cambridge                                                                                | COVID-19 Genomics UK (COG-UK) Consortium                                                                                        | Aminu S. Jahun, Yasmin Chaudhry, Grant Hall, Iliana Georgana, Myra Hosmillo, Martin D. Curran, Malte Pinckert, Surendra Parmar, Ian Goodfellow                                                                                                                                                                                                                                                                        |
| EPI_ISL_640129, EPI_ISL_640130                 | Groote Schuur Hospital wc GSH                                                                                                   | NHLS/UCT                                                                                                                        | Arash Iranzadeh, Deelan Doolabh, Lynn Tyers, Bruna Galvao, Innocent Mudau, Marvin Hsiao, Kruger Marais, Diana Hardie, Stephen Korsman, Carolyn Williamson                                                                                                                                                                                                                                                             |
| EPI_ISL_641612                                 | Lighthouse Lab in Glasgow                                                                                                       | Wellcome Sanger Institute for the COVID-19 Genomics UK (COG-UK) Consortium                                                      | Harper VanSteenhouse, Yumi Kasai, David Gray, Carol Clugston, Anna Dominiczak and Alex Alderton, Roberto Amato, Sonia Goncalves, Ewan Harrison, David K. Jackson, Ian Johnston, Dominic Kwiatkowski, Cordelia Langford, John Sillitoe on behalf of the Wellcome Sanger Institute COVID-19 Surveillance Team                                                                                                           |
| EPI_ISL_647445                                 | Lighthouse Lab in Cambridge                                                                                                     | Wellcome Sanger Institute for the COVID-19 Genomics UK (COG-UK) Consortium                                                      | Rob Howes, The Lighthouse Lab in Cambridge and Alex Alderton, Roberto Amato, Sonia Goncalves, Ewan Harrison, David K. Jackson, Ian Johnston, Dominic Kwiatkowski, Cordelia Langford, John Sillitoe on behalf of the Wellcome Sanger Institute COVID-19 Surveillance Team                                                                                                                                              |
| EPI_ISL_651545, EPI_ISL_652142                 | Oxford Viromics, NDM, University of Oxford; Oxford University Hospitals; Basingstoke and North Hampshire Hospital               | COVID-19 Genomics UK (COG-UK) Consortium                                                                                        | Tanya Golubchik, David Bonsall, George Macintyre, Amy Trebes, Mariateresa de Cesare, Catrin Moore, Alex Mobbs, Anita Justice, Robert Shaw, Monique Andersson, Timothy Peto, Emma Wise, Nathan Moore, Jessica Lynch, Nick Cortes, Matilde Mori, Stephen Kidd, David Buck, John Todd, Christophe Fraser                                                                                                                 |
| EPI_ISL_664305                                 | Department of Pathology, University of Cambridge                                                                                | COVID-19 Genomics UK (COG-UK) Consortium                                                                                        | Aminu S. Jahun, Yasmin Chaudhry, Grant Hall, Iliana Georgana, Myra Hosmillo, Martin D. Curran, Malte Pinckert, Surendra Parmar, Ian Goodfellow                                                                                                                                                                                                                                                                        |
| EPI_ISL_665642                                 | Wales Specialist Virology Centre Sequencing lab: Pathogen Genomics Unit                                                         | COVID-19 Genomics UK (COG-UK) Consortium                                                                                        | Catherine Moore, Johnathan Evans, Laura Gifford, Malorie Perry, Simon Cottrell, Angela Marchbank, Alec Burchley, Alexander Adams, Amy Gaskin, Bree Gatica-Wilcox, Jason Coombes, Joel Southgate, Lauren Gilbert, Lee Graham, Nicole Pacchiarini, Sara Kumziene-Summerhayes, Sarah Taylor, Sophie Jones, Sara Rey, Matthew Bull, Joanne Watkins, Sally Corden, Tom Connor                                              |

|                                                                                                                                                                                                                                                                |                                                                                                                                  |                                                                                                                                   |                                                                                                                                                                                                                                                                                                                                                                          |
|----------------------------------------------------------------------------------------------------------------------------------------------------------------------------------------------------------------------------------------------------------------|----------------------------------------------------------------------------------------------------------------------------------|-----------------------------------------------------------------------------------------------------------------------------------|--------------------------------------------------------------------------------------------------------------------------------------------------------------------------------------------------------------------------------------------------------------------------------------------------------------------------------------------------------------------------|
| EPI_ISL_667882                                                                                                                                                                                                                                                 | Lighthouse Lab in Cambridge                                                                                                      | Wellcome Sanger Institute for the COVID-19 Genomics UK (COG-UK) Consortium                                                        | Rob Howes, The Lighthouse Lab in Cambridge and Alex Alderton, Roberto Amato, Sonia Goncalves, Ewan Harrison, David K. Jackson, Ian Johnston, Dominic Kwiatkowski, Cordelia Langford, John Sillitoe on behalf of the Wellcome Sanger Institute COVID-19 Surveillance Team                                                                                                 |
| EPI_ISL_672205                                                                                                                                                                                                                                                 | The Ashley Laboratory, Stanford University                                                                                       | Chan-Zuckerberg Biohub                                                                                                            | CZB Cilahub Consortium                                                                                                                                                                                                                                                                                                                                                   |
| EPI_ISL_672672, EPI_ISL_672673, EPI_ISL_672677, EPI_ISL_672678                                                                                                                                                                                                 | DB Diagnosticos do Brasil                                                                                                        | Laboratório de Parasitologia Médica - Instituto de Medicina Tropical - Universidade de São Paulo                                  | Brazil-UK Centre for Arbovirus Discovery Diagnosis Genomics and Epidemiology (CADDE) Genomic Network - Instituto de Medicina Tropical                                                                                                                                                                                                                                    |
| EPI_ISL_672687, EPI_ISL_672690, EPI_ISL_672691, EPI_ISL_672692, EPI_ISL_672693, EPI_ISL_672694, EPI_ISL_672697, EPI_ISL_672699, EPI_ISL_672700                                                                                                                 | Hospital das Clínicas da Faculdade de Medicina da Universidade de São Paulo (HC-FMUSP)                                           | Laboratório de Parasitologia Médica - Instituto de Medicina Tropical - Universidade de São Paulo                                  | Brazil-UK Centre for Arbovirus Discovery Diagnosis Genomics and Epidemiology (CADDE) Genomic Network - Instituto de Medicina Tropical                                                                                                                                                                                                                                    |
| EPI_ISL_672701, EPI_ISL_672702, EPI_ISL_672703, EPI_ISL_672704, EPI_ISL_672705, EPI_ISL_672706, EPI_ISL_672710, EPI_ISL_672711, EPI_ISL_672713, EPI_ISL_672715, EPI_ISL_672716, EPI_ISL_672717, EPI_ISL_672718, EPI_ISL_672719, EPI_ISL_672720, EPI_ISL_672721 | see above                                                                                                                        | Institute of Tropical Medicine at the University of São Paulo (IMT-USP)                                                           | Laboratório de Parasitologia Médica - Instituto de Medicina Tropical - Universidade de São Paulo                                                                                                                                                                                                                                                                         |
| EPI_ISL_672722, EPI_ISL_672724, EPI_ISL_672725, EPI_ISL_672726, EPI_ISL_672727, EPI_ISL_672729, EPI_ISL_672732, EPI_ISL_672734, EPI_ISL_672735, EPI_ISL_672739, EPI_ISL_672740, EPI_ISL_672741, EPI_ISL_672742, EPI_ISL_672743                                 | see above                                                                                                                        | Hospital das Clínicas da Faculdade de Medicina da Universidade de São Paulo (HC-FMUSP)                                            | Laboratório de Parasitologia Médica - Instituto de Medicina Tropical - Universidade de São Paulo                                                                                                                                                                                                                                                                         |
| EPI_ISL_672748, EPI_ISL_672749, EPI_ISL_672750                                                                                                                                                                                                                 | Institute of Tropical Medicine at the University of São Paulo (IMT-USP)                                                          | Laboratório de Parasitologia Médica - Instituto de Medicina Tropical - Universidade de São Paulo                                  | Brazil-UK Centre for Arbovirus Discovery Diagnosis Genomics and Epidemiology (CADDE) Genomic Network - Instituto de Medicina Tropical                                                                                                                                                                                                                                    |
| EPI_ISL_673528                                                                                                                                                                                                                                                 | Lighthouse Lab in Cambridge                                                                                                      | Wellcome Sanger Institute for the COVID-19 Genomics UK (COG-UK) Consortium                                                        | Rob Howes, The Lighthouse Lab in Cambridge and Alex Alderton, Roberto Amato, Sonia Goncalves, Ewan Harrison, David K. Jackson, Ian Johnston, Dominic Kwiatkowski, Cordelia Langford, John Sillitoe on behalf of the Wellcome Sanger Institute COVID-19 Surveillance Team                                                                                                 |
| EPI_ISL_673840, EPI_ISL_675353                                                                                                                                                                                                                                 | Lighthouse Lab in Milton Keynes                                                                                                  | Wellcome Sanger Institute for the COVID-19 Genomics UK (COG-UK) Consortium                                                        | The Lighthouse Lab in Milton Keynes and Alex Alderton, Roberto Amato, Sonia Goncalves, Ewan Harrison, David K. Jackson, Ian Johnston, Dominic Kwiatkowski, Cordelia Langford, John Sillitoe on behalf of the Wellcome Sanger Institute COVID-19 Surveillance Team                                                                                                        |
| EPI_ISL_678320                                                                                                                                                                                                                                                 | Area of Virology, Serology and Virology Division (SAVID), New South Wales Health Pathology Randwick                              | Virology Research Laboratory; Area of Virology, Serology and Virology Division (SAVID), New South Wales Health Pathology Randwick | Foster, C.; Au, J.; Ruiz Silva, M.; Deveson, I.; Bull, R.; Van Hal, S.; Rawlinson, W.                                                                                                                                                                                                                                                                                    |
| EPI_ISL_679616                                                                                                                                                                                                                                                 | University College London, Great Ormond Street Hospital for Children NHS Foundation Trust, Imperial College Healthcare NHS Trust | COVID-19 Genomics UK (COG-UK) Consortium                                                                                          | Sergi Castellano, Rachel Williams, Mark Kristiansen, Paola Resende Silva, Sunando Roy, Tony Brooks, Helena Tutill, Paola Niola, Patricia Dyal, Charlotte Williams, Leysa Forrest, Yasmin Panchbhaya, Jacqueline Findlay, Samuel Weeks, Julianne Brown, Kathryn Harris, Paul Randell, James Price, Alison Holmes, Judith Breuer                                           |
| EPI_ISL_679661                                                                                                                                                                                                                                                 | Oxford Viromics, NDM, University of Oxford; Oxford University Hospitals; Basingstoke and North Hampshire Hospital                | COVID-19 Genomics UK (COG-UK) Consortium                                                                                          | Tanya Golubchik, David Bonsall, George Macintyre, Amy Trebes, Mariateresa de Cesare, Catrin Moore, Alex Mobbs, Anita Justice, Robert Shaw, Monique Andersson, Timothy Peto, Emma Wise, Nathan Moore, Jessica Lynch, Nick Cortes, Matilde Mori, Stephen Kidd, David Buck, John Todd, Christophe Fraser                                                                    |
| EPI_ISL_681143                                                                                                                                                                                                                                                 | Wales Specialist Virology Centre Sequencing lab: Pathogen Genomics Unit                                                          | COVID-19 Genomics UK (COG-UK) Consortium                                                                                          | Catherine Moore, Johnathan Evans, Laura Gifford, Malorie Perry, Simon Cottrell, Angela Marchbank, Alec Birchley, Alexander Adams, Amy Gaskin, Bree Gatica-Wilcox, Jason Coombes, Joel Southgate, Lauren Gilbert, Lee Graham, Nicole Pacchiarini, Sara Kumziene-Summerhayes, Sarah Taylor, Sophie Jones, Sara Rey, Matthew Bull, Joanne Watkins, Sally Corden, Tom Connor |
| EPI_ISL_693195                                                                                                                                                                                                                                                 | Hospital e Pronto Socorro Portinari                                                                                              | Instituto Adolfo Lutz, Interdisciplinary Procedures Center, Strategic Laboratory                                                  | Claudio Tavares Sacchi, Claudia Regina Gonçalves, Erica Valessa Ramos Gomes, Karoline Rodrigues Campos                                                                                                                                                                                                                                                                   |
| EPI_ISL_693196                                                                                                                                                                                                                                                 | Hospital Santa Clara                                                                                                             | Instituto Adolfo Lutz, Interdisciplinary Procedures Center, Strategic Laboratory                                                  | Claudio Tavares Sacchi, Claudia Regina Gonçalves, Erica Valessa Ramos Gomes, Karoline Rodrigues Campos                                                                                                                                                                                                                                                                   |
| EPI_ISL_693197                                                                                                                                                                                                                                                 | Central de Rede de Frio Municipal                                                                                                | Instituto Adolfo Lutz, Interdisciplinary Procedures Center, Strategic Laboratory                                                  | Claudio Tavares Sacchi, Claudia Regina Gonçalves, Erica Valessa Ramos Gomes, Karoline Rodrigues Campos                                                                                                                                                                                                                                                                   |
| EPI_ISL_693198                                                                                                                                                                                                                                                 | Santa Casa de Misericórdia de Sao Paulo - Hospital Central                                                                       | Instituto Adolfo Lutz, Interdisciplinary Procedures Center, Strategic Laboratory                                                  | Claudio Tavares Sacchi, Claudia Regina Gonçalves, Erica Valessa Ramos Gomes, Karoline Rodrigues Campos                                                                                                                                                                                                                                                                   |
| EPI_ISL_693199                                                                                                                                                                                                                                                 | Hospital do Servidor Publico Estadual Francisco Morato de Oliveira                                                               | Instituto Adolfo Lutz, Interdisciplinary Procedures Center, Strategic Laboratory                                                  | Claudio Tavares Sacchi, Claudia Regina Gonçalves, Erica Valessa Ramos Gomes, Karoline Rodrigues Campos                                                                                                                                                                                                                                                                   |
| EPI_ISL_693200                                                                                                                                                                                                                                                 | Hospital e Maternidade Mairipora                                                                                                 | Instituto Adolfo Lutz, Interdisciplinary Procedures Center, Strategic Laboratory                                                  | Claudio Tavares Sacchi, Claudia Regina Gonçalves, Erica Valessa Ramos Gomes, Karoline Rodrigues Campos                                                                                                                                                                                                                                                                   |
| EPI_ISL_693201                                                                                                                                                                                                                                                 | Hospital Sao Paulo de Ensino da Unifesp                                                                                          | Instituto Adolfo Lutz, Interdisciplinary Procedures Center, Strategic Laboratory                                                  | Claudio Tavares Sacchi, Claudia Regina Gonçalves, Erica Valessa Ramos Gomes, Karoline Rodrigues Campos                                                                                                                                                                                                                                                                   |
| EPI_ISL_693202                                                                                                                                                                                                                                                 | Pronto Socorro Municipal Prof. Joao Catarin Mezomo                                                                               | Instituto Adolfo Lutz, Interdisciplinary Procedures Center, Strategic Laboratory                                                  | Claudio Tavares Sacchi, Claudia Regina Gonçalves, Erica Valessa Ramos Gomes, Karoline Rodrigues Campos                                                                                                                                                                                                                                                                   |
| EPI_ISL_693203                                                                                                                                                                                                                                                 | Hospital Municipal Doutor Arthur Ribeiro de Saboya                                                                               | Instituto Adolfo Lutz, Interdisciplinary Procedures Center, Strategic Laboratory                                                  | Claudio Tavares Sacchi, Claudia Regina Gonçalves, Erica Valessa Ramos Gomes, Karoline Rodrigues Campos                                                                                                                                                                                                                                                                   |
| EPI_ISL_693204                                                                                                                                                                                                                                                 | Pronto Socorro Dr. Conrado Cesarino Nuvolini                                                                                     | Instituto Adolfo Lutz, Interdisciplinary Procedures Center, Strategic Laboratory                                                  | Claudio Tavares Sacchi, Claudia Regina Gonçalves, Erica Valessa Ramos Gomes, Karoline Rodrigues Campos                                                                                                                                                                                                                                                                   |
| EPI_ISL_693205                                                                                                                                                                                                                                                 | Hospital de Campanha Covid-19 Assis                                                                                              | Instituto Adolfo Lutz, Interdisciplinary Procedures Center, Strategic Laboratory                                                  | Claudio Tavares Sacchi, Claudia Regina Gonçalves, Erica Valessa Ramos Gomes, Karoline Rodrigues Campos                                                                                                                                                                                                                                                                   |
| EPI_ISL_693206                                                                                                                                                                                                                                                 | Hospital Municipal Mario Gatti                                                                                                   | Instituto Adolfo Lutz, Interdisciplinary Procedures Center, Strategic Laboratory                                                  | Claudio Tavares Sacchi, Claudia Regina Gonçalves, Erica Valessa Ramos Gomes, Karoline Rodrigues Campos                                                                                                                                                                                                                                                                   |
| EPI_ISL_693207                                                                                                                                                                                                                                                 | Cs II Doutor Antonio Vicoso Moreira de Rezende                                                                                   | Instituto Adolfo Lutz, Interdisciplinary Procedures Center, Strategic Laboratory                                                  | Claudio Tavares Sacchi, Claudia Regina Gonçalves, Erica Valessa Ramos Gomes, Karoline Rodrigues Campos                                                                                                                                                                                                                                                                   |
| EPI_ISL_693208, EPI_ISL_693209                                                                                                                                                                                                                                 | Hospital Municipal Antonio Giglio                                                                                                | Instituto Adolfo Lutz, Interdisciplinary Procedures Center, Strategic Laboratory                                                  | Claudio Tavares Sacchi, Claudia Regina Gonçalves, Erica Valessa Ramos Gomes, Karoline Rodrigues Campos                                                                                                                                                                                                                                                                   |
| EPI_ISL_693210                                                                                                                                                                                                                                                 | Pronto-Socorro Dr. Osmar Mesquita                                                                                                | Instituto Adolfo Lutz, Interdisciplinary Procedures Center, Strategic Laboratory                                                  | Claudio Tavares Sacchi, Claudia Regina Gonçalves, Erica Valessa Ramos Gomes, Karoline Rodrigues Campos                                                                                                                                                                                                                                                                   |
| EPI_ISL_693211                                                                                                                                                                                                                                                 | Santa Casa de Misericórdia e Maternidade                                                                                         | Instituto Adolfo Lutz, Interdisciplinary Procedures Center, Strategic Laboratory                                                  | Claudio Tavares Sacchi, Claudia Regina Gonçalves, Erica Valessa Ramos Gomes, Karoline Rodrigues Campos                                                                                                                                                                                                                                                                   |
| EPI_ISL_693212                                                                                                                                                                                                                                                 | Santa Casa de Misericórdia de Braganca Paulista                                                                                  | Instituto Adolfo Lutz, Interdisciplinary Procedures Center, Strategic Laboratory                                                  | Claudio Tavares Sacchi, Claudia Regina Gonçalves, Erica Valessa Ramos Gomes, Karoline Rodrigues Campos                                                                                                                                                                                                                                                                   |
| EPI_ISL_693214                                                                                                                                                                                                                                                 | Unidade de Pronto Atendimento Central de Caraguatatuba                                                                           | Instituto Adolfo Lutz, Interdisciplinary Procedures Center, Strategic Laboratory                                                  | Claudio Tavares Sacchi, Claudia Regina Gonçalves, Erica Valessa Ramos Gomes, Karoline Rodrigues Campos                                                                                                                                                                                                                                                                   |
| EPI_ISL_693215                                                                                                                                                                                                                                                 | Secretaria Municipal de Saúde de Iracemapolis                                                                                    | Instituto Adolfo Lutz, Interdisciplinary Procedures Center, Strategic Laboratory                                                  | Claudio Tavares Sacchi, Claudia Regina Gonçalves, Erica Valessa Ramos Gomes, Karoline Rodrigues Campos                                                                                                                                                                                                                                                                   |

|                                                                                                                                                                                                                                                                                                 |                                                                                                           |                                                                                  |                                                                                                                                                                                                                                                                                                                                                                                                                                                           |
|-------------------------------------------------------------------------------------------------------------------------------------------------------------------------------------------------------------------------------------------------------------------------------------------------|-----------------------------------------------------------------------------------------------------------|----------------------------------------------------------------------------------|-----------------------------------------------------------------------------------------------------------------------------------------------------------------------------------------------------------------------------------------------------------------------------------------------------------------------------------------------------------------------------------------------------------------------------------------------------------|
| EPI_ISL_693216, EPI_ISL_693217                                                                                                                                                                                                                                                                  | Unidade de Vigilância Epidemiológica de Araras                                                            | Instituto Adolfo Lutz, Interdisciplinary Procedures Center, Strategic Laboratory | Claudio Tavares Sacchi, Claudia Regina Gonçalves, Erica Valessa Ramos Gomes, Karoline Rodrigues Campos                                                                                                                                                                                                                                                                                                                                                    |
| EPI_ISL_693223, EPI_ISL_693224                                                                                                                                                                                                                                                                  | Laboratório Municipal de Piracicaba                                                                       | Instituto Adolfo Lutz, Interdisciplinary Procedures Center, Strategic Laboratory | Claudio Tavares Sacchi, Claudia Regina Gonçalves, Erica Valessa Ramos Gomes, Karoline Rodrigues Campos                                                                                                                                                                                                                                                                                                                                                    |
| EPI_ISL_693225                                                                                                                                                                                                                                                                                  | Ubs Vila Rosa - Olimpia Gomes De Almeida                                                                  | Instituto Adolfo Lutz, Interdisciplinary Procedures Center, Strategic Laboratory | Claudio Tavares Sacchi, Claudia Regina Gonçalves, Erica Valessa Ramos Gomes, Karoline Rodrigues Campos                                                                                                                                                                                                                                                                                                                                                    |
| EPI_ISL_693226                                                                                                                                                                                                                                                                                  | Unidade de Pronto Atendimento Sao José                                                                    | Instituto Adolfo Lutz, Interdisciplinary Procedures Center, Strategic Laboratory | Claudio Tavares Sacchi, Claudia Regina Gonçalves, Erica Valessa Ramos Gomes, Karoline Rodrigues Campos                                                                                                                                                                                                                                                                                                                                                    |
| EPI_ISL_693228                                                                                                                                                                                                                                                                                  | Secretaria Municipal de Sorocaba                                                                          | Instituto Adolfo Lutz, Interdisciplinary Procedures Center, Strategic Laboratory | Claudio Tavares Sacchi, Claudia Regina Gonçalves, Erica Valessa Ramos Gomes, Karoline Rodrigues Campos                                                                                                                                                                                                                                                                                                                                                    |
| EPI_ISL_693229                                                                                                                                                                                                                                                                                  | Hospital 8 de Maio                                                                                        | Instituto Adolfo Lutz, Interdisciplinary Procedures Center, Strategic Laboratory | Claudio Tavares Sacchi, Claudia Regina Gonçalves, Erica Valessa Ramos Gomes, Karoline Rodrigues Campos                                                                                                                                                                                                                                                                                                                                                    |
| EPI_ISL_693230                                                                                                                                                                                                                                                                                  | Hospital e Pronto Socorro Portinari                                                                       | Instituto Adolfo Lutz, Interdisciplinary Procedures Center, Strategic Laboratory | Claudio Tavares Sacchi, Claudia Regina Gonçalves, Erica Valessa Ramos Gomes, Karoline Rodrigues Campos                                                                                                                                                                                                                                                                                                                                                    |
| EPI_ISL_693231                                                                                                                                                                                                                                                                                  | Pronto Socorro Municipal de Santa Branca                                                                  | Instituto Adolfo Lutz, Interdisciplinary Procedures Center, Strategic Laboratory | Claudio Tavares Sacchi, Claudia Regina Gonçalves, Erica Valessa Ramos Gomes, Karoline Rodrigues Campos                                                                                                                                                                                                                                                                                                                                                    |
| EPI_ISL_693232                                                                                                                                                                                                                                                                                  | Hospital e Pronto Socorro Portinari                                                                       | Instituto Adolfo Lutz, Interdisciplinary Procedures Center, Strategic Laboratory | Claudio Tavares Sacchi, Claudia Regina Gonçalves, Erica Valessa Ramos Gomes, Karoline Rodrigues Campos                                                                                                                                                                                                                                                                                                                                                    |
| EPI_ISL_693233                                                                                                                                                                                                                                                                                  | Hospital Santa Cruz                                                                                       | Instituto Adolfo Lutz, Interdisciplinary Procedures Center, Strategic Laboratory | Claudio Tavares Sacchi, Claudia Regina Gonçalves, Erica Valessa Ramos Gomes, Karoline Rodrigues Campos                                                                                                                                                                                                                                                                                                                                                    |
| EPI_ISL_693234                                                                                                                                                                                                                                                                                  | Upa Vereador Jose Da Rocha Goncalves                                                                      | Instituto Adolfo Lutz, Interdisciplinary Procedures Center, Strategic Laboratory | Claudio Tavares Sacchi, Claudia Regina Gonçalves, Erica Valessa Ramos Gomes, Karoline Rodrigues Campos                                                                                                                                                                                                                                                                                                                                                    |
| EPI_ISL_693235                                                                                                                                                                                                                                                                                  | Casmi Centro Atendimento Saude da Mulher e Infancia                                                       | Instituto Adolfo Lutz, Interdisciplinary Procedures Center, Strategic Laboratory | Claudio Tavares Sacchi, Claudia Regina Gonçalves, Erica Valessa Ramos Gomes, Karoline Rodrigues Campos                                                                                                                                                                                                                                                                                                                                                    |
| EPI_ISL_693236                                                                                                                                                                                                                                                                                  | Hospital Santa Marcelina Sao Paulo                                                                        | Instituto Adolfo Lutz, Interdisciplinary Procedures Center, Strategic Laboratory | Claudio Tavares Sacchi, Claudia Regina Gonçalves, Erica Valessa Ramos Gomes, Karoline Rodrigues Campos                                                                                                                                                                                                                                                                                                                                                    |
| EPI_ISL_693237                                                                                                                                                                                                                                                                                  | UPA Santa Isabel                                                                                          | Instituto Adolfo Lutz, Interdisciplinary Procedures Center, Strategic Laboratory | Claudio Tavares Sacchi, Claudia Regina Gonçalves, Erica Valessa Ramos Gomes, Karoline Rodrigues Campos                                                                                                                                                                                                                                                                                                                                                    |
| EPI_ISL_693238, EPI_ISL_693239                                                                                                                                                                                                                                                                  | Secao Centro de Diagnostico Secedi                                                                        | Instituto Adolfo Lutz, Interdisciplinary Procedures Center, Strategic Laboratory | Claudio Tavares Sacchi, Claudia Regina Gonçalves, Erica Valessa Ramos Gomes, Karoline Rodrigues Campos                                                                                                                                                                                                                                                                                                                                                    |
| EPI_ISL_693240                                                                                                                                                                                                                                                                                  | Centro de Vigilância a Saude de Diadema                                                                   | Instituto Adolfo Lutz, Interdisciplinary Procedures Center, Strategic Laboratory | Claudio Tavares Sacchi, Claudia Regina Gonçalves, Erica Valessa Ramos Gomes, Karoline Rodrigues Campos                                                                                                                                                                                                                                                                                                                                                    |
| EPI_ISL_693241                                                                                                                                                                                                                                                                                  | Hospital e Maternidade Sao Lucas                                                                          | Instituto Adolfo Lutz, Interdisciplinary Procedures Center, Strategic Laboratory | Claudio Tavares Sacchi, Claudia Regina Gonçalves, Erica Valessa Ramos Gomes, Karoline Rodrigues Campos                                                                                                                                                                                                                                                                                                                                                    |
| EPI_ISL_693242                                                                                                                                                                                                                                                                                  | Centro de Vigilância a Saude de Diadema                                                                   | Instituto Adolfo Lutz, Interdisciplinary Procedures Center, Strategic Laboratory | Claudio Tavares Sacchi, Claudia Regina Gonçalves, Erica Valessa Ramos Gomes, Karoline Rodrigues Campos                                                                                                                                                                                                                                                                                                                                                    |
| EPI_ISL_693243                                                                                                                                                                                                                                                                                  | Laboratório Municipal de Piracicaba                                                                       | Instituto Adolfo Lutz, Interdisciplinary Procedures Center, Strategic Laboratory | Claudio Tavares Sacchi, Claudia Regina Gonçalves, Erica Valessa Ramos Gomes, Karoline Rodrigues Campos                                                                                                                                                                                                                                                                                                                                                    |
| EPI_ISL_693244                                                                                                                                                                                                                                                                                  | Centro Médico da Polícia Militar do Estado de Sao Paulo                                                   | Instituto Adolfo Lutz, Interdisciplinary Procedures Center, Strategic Laboratory | Claudio Tavares Sacchi, Claudia Regina Gonçalves, Erica Valessa Ramos Gomes, Karoline Rodrigues Campos                                                                                                                                                                                                                                                                                                                                                    |
| EPI_ISL_693245                                                                                                                                                                                                                                                                                  | UPA Santa Isabel                                                                                          | Instituto Adolfo Lutz, Interdisciplinary Procedures Center, Strategic Laboratory | Claudio Tavares Sacchi, Claudia Regina Gonçalves, Erica Valessa Ramos Gomes, Karoline Rodrigues Campos                                                                                                                                                                                                                                                                                                                                                    |
| EPI_ISL_693257, EPI_ISL_693278                                                                                                                                                                                                                                                                  | Public Health Virology Laboratory, Forensic and Scientific Services (PHV-FSS)                             | Public Health Virology Laboratory, Forensic and Scientific Services (PHV-FSS)    | Son Nguyen et al                                                                                                                                                                                                                                                                                                                                                                                                                                          |
| EPI_ISL_702072, EPI_ISL_702085                                                                                                                                                                                                                                                                  | Lighthouse Lab in Cambridge                                                                               | Wellcome Sanger Institute for the COVID-19 Genomics UK (COG-UK) Consortium       | Rob Howes, The Lighthouse Lab in Cambridge and Alex Alderton, Roberto Amato, Sonia Goncalves, Ewan Harrison, David K. Jackson, Ian Johnston, Dominic Kwiatkowski, Cordelia Langford, John Sillitoe on behalf of the Wellcome Sanger Institute COVID-19 Surveillance Team                                                                                                                                                                                  |
| EPI_ISL_703236                                                                                                                                                                                                                                                                                  | Lighthouse Lab in Alderley Park                                                                           | Wellcome Sanger Institute for the COVID-19 Genomics UK (COG-UK) Consortium       | Jacquelyn Wynn, Mairead Hyland, The Lighthouse Lab in Alderley Park and Alex Alderton, Roberto Amato, Sonia Goncalves, Ewan Harrison, David K. Jackson, Ian Johnston, Dominic Kwiatkowski, Cordelia Langford, John Sillitoe on behalf of the Wellcome Sanger Institute COVID-19 Surveillance Team                                                                                                                                                         |
| EPI_ISL_703264                                                                                                                                                                                                                                                                                  | Quadram Institute Bioscience                                                                              | COVID-19 Genomics UK (COG-UK) Consortium                                         | Dave J. Baker, Gemma L. Kay, Alp Aydin, Thanh Le-Viet, Steven Rudder, Ana P. Tedim, Anastasia Kolyva, Maria Diaz, Leonardo de Oliveira Martins, Nabil-Fareed Alikhan, Lizzie Meadows, Rachael Stanley, Ngozi Elumogo, Muhammed Yasir, Nicholas M. Thomson, Alexander J Trotter, Rachel Gilroy, Samuel Bloomfield, Claire Stuart, Andrew Bell, Reenesh Prakash, Samir Dervisevic, Alison E. Mather, John Wain, Mark Webber, Andrew J. Page, Justin O'Grady |
| EPI_ISL_703933                                                                                                                                                                                                                                                                                  | Lighthouse Lab in Glasgow                                                                                 | Wellcome Sanger Institute for the COVID-19 Genomics UK (COG-UK) Consortium       | Harper VanSteenhouse, Yumi Kasai, David Gray, Carol Clugston, Anna Dominiczak and Alex Alderton, Roberto Amato, Sonia Goncalves, Ewan Harrison, David K. Jackson, Ian Johnston, Dominic Kwiatkowski, Cordelia Langford, John Sillitoe on behalf of the Wellcome Sanger Institute COVID-19 Surveillance Team                                                                                                                                               |
| EPI_ISL_704666                                                                                                                                                                                                                                                                                  | University College London Hospital                                                                        | COVID-19 Genomics UK (COG-UK) Consortium                                         | Judith Heaney, Matthew Byott, Catherine Houlihan, Dan Frampton, Stuart Kirk, Moira Spyer and Eleni Nastouli                                                                                                                                                                                                                                                                                                                                               |
| EPI_ISL_704754                                                                                                                                                                                                                                                                                  | Quadram Institute Bioscience                                                                              | COVID-19 Genomics UK (COG-UK) Consortium                                         | Dave J. Baker, Gemma L. Kay, Alp Aydin, Thanh Le-Viet, Steven Rudder, Ana P. Tedim, Anastasia Kolyva, Maria Diaz, Leonardo de Oliveira Martins, Nabil-Fareed Alikhan, Lizzie Meadows, Rachael Stanley, Ngozi Elumogo, Muhammed Yasir, Nicholas M. Thomson, Alexander J Trotter, Rachel Gilroy, Samuel Bloomfield, Claire Stuart, Andrew Bell, Reenesh Prakash, Samir Dervisevic, Alison E. Mather, John Wain, Mark Webber, Andrew J. Page, Justin O'Grady |
| EPI_ISL_704804, EPI_ISL_704807                                                                                                                                                                                                                                                                  | West of Scotland Specialist Virology Centre, NHSGGC / MRC-University of Glasgow Centre for Virus Research | COVID-19 Genomics UK (COG-UK) Consortium                                         | Ana da Silva Filipe, Natasha Johnson, Kathy Smollett, Daniel Mair, Stephen Carmichael, Alice Broos, Lily Tong, Jenna Nichols, Kyriaki Nomikou; Sarah McDonald; Richard Orton, Joseph Hughes, Sreenu Vattipally, David L Robertson; Alasdair MacLean, Rory Gunson; Sharif Shaaban, Matthew Holden; Rachel Blacow, Guy Mollett, Kathy Li, James Shepherd, Antonia Ho, Emma Thomson                                                                          |
| EPI_ISL_704933                                                                                                                                                                                                                                                                                  | Lighthouse Lab in Cambridge                                                                               | Wellcome Sanger Institute for the COVID-19 Genomics UK (COG-UK) Consortium       | Rob Howes, The Lighthouse Lab in Cambridge and Alex Alderton, Roberto Amato, Sonia Goncalves, Ewan Harrison, David K. Jackson, Ian Johnston, Dominic Kwiatkowski, Cordelia Langford, John Sillitoe on behalf of the Wellcome Sanger Institute COVID-19 Surveillance Team                                                                                                                                                                                  |
| EPI_ISL_708745                                                                                                                                                                                                                                                                                  | PathWest Laboratory Medicine WA                                                                           | PathWest Laboratory Medicine WA Microbial Surveillance Unit                      | PathWest Laboratory Medicine WA Microbial Surveillance Unit                                                                                                                                                                                                                                                                                                                                                                                               |
| EPI_ISL_709698                                                                                                                                                                                                                                                                                  | Lighthouse Lab in Milton Keynes                                                                           | Wellcome Sanger Institute for the COVID-19 Genomics UK (COG-UK) Consortium       | The Lighthouse Lab in Milton Keynes and Alex Alderton, Roberto Amato, Sonia Goncalves, Ewan Harrison, David K. Jackson, Ian Johnston, Dominic Kwiatkowski, Cordelia Langford, John Sillitoe on behalf of the Wellcome Sanger Institute COVID-19 Surveillance Team                                                                                                                                                                                         |
| EPI_ISL_717787, EPI_ISL_717794, EPI_ISL_717798                                                                                                                                                                                                                                                  | LACEN RJ - Noel Nutels                                                                                    | Bioinformatics Laboratory / LNCC                                                 | Carolina M Voloch, Ronaldo da Silva F Jr, Luiz G P de Almeida, Cynthia C Cardoso, Otavio Bustroli, Alexandra L Gerber, Ana Paula de C Guimaraes, Diana Mariani, Andréa Cony Cavalcanti, Claudia dos Santos Rodrigues, Terezinha M P P Castifeira, Amílcar Tanuri, Ana Tereza R de Vasconcelos                                                                                                                                                             |
| EPI_ISL_717807, EPI_ISL_717808, EPI_ISL_717810, EPI_ISL_717811, EPI_ISL_717812, EPI_ISL_717813, EPI_ISL_717814, EPI_ISL_717815, EPI_ISL_717816, EPI_ISL_717817, EPI_ISL_717819, EPI_ISL_717820, EPI_ISL_717821, EPI_ISL_717822, EPI_ISL_717823, EPI_ISL_717824, EPI_ISL_717825, EPI_ISL_717826, |                                                                                                           |                                                                                  |                                                                                                                                                                                                                                                                                                                                                                                                                                                           |



|                                                                                                                                                                                                                                                                                                                                                                                                                                                                                                                                                                                                                                                                                                                                                                                                                                                                                                                                                                                                                                                                                                                                                                                                                                                                                                                                                                                                                                                                                                                                |                                                                                                                                                                                                                     |                                                                                                  |                                                                                                                                                                                                                                                                                                                                                                                                                                                           |                                                                                                                                                                                                                                                                                              |
|--------------------------------------------------------------------------------------------------------------------------------------------------------------------------------------------------------------------------------------------------------------------------------------------------------------------------------------------------------------------------------------------------------------------------------------------------------------------------------------------------------------------------------------------------------------------------------------------------------------------------------------------------------------------------------------------------------------------------------------------------------------------------------------------------------------------------------------------------------------------------------------------------------------------------------------------------------------------------------------------------------------------------------------------------------------------------------------------------------------------------------------------------------------------------------------------------------------------------------------------------------------------------------------------------------------------------------------------------------------------------------------------------------------------------------------------------------------------------------------------------------------------------------|---------------------------------------------------------------------------------------------------------------------------------------------------------------------------------------------------------------------|--------------------------------------------------------------------------------------------------|-----------------------------------------------------------------------------------------------------------------------------------------------------------------------------------------------------------------------------------------------------------------------------------------------------------------------------------------------------------------------------------------------------------------------------------------------------------|----------------------------------------------------------------------------------------------------------------------------------------------------------------------------------------------------------------------------------------------------------------------------------------------|
| EPI_ISL_717827, EPI_ISL_717828, EPI_ISL_717829, EPI_ISL_717830, EPI_ISL_717923                                                                                                                                                                                                                                                                                                                                                                                                                                                                                                                                                                                                                                                                                                                                                                                                                                                                                                                                                                                                                                                                                                                                                                                                                                                                                                                                                                                                                                                 | see above                                                                                                                                                                                                           | Laboratório de Virologia Molecular / UFRJ                                                        | Bioinformatics Laboratory / LNCC                                                                                                                                                                                                                                                                                                                                                                                                                          | Carolina M Voloch, Ronaldo da Silva F Jr, Luiz G P de Almeida, Cynthia C Cardoso, Otavio Bustroli, Alexandra L Gerber, Ana Paula de C Guimarães, Diana Mariani, Andréa Cony Cavalcanti, Claudia dos Santos Rodrigues, Terezinha M P P Castifeira, Amicar Tanuri, Ana Tereza R de Vasconcelos |
| EPI_ISL_720851                                                                                                                                                                                                                                                                                                                                                                                                                                                                                                                                                                                                                                                                                                                                                                                                                                                                                                                                                                                                                                                                                                                                                                                                                                                                                                                                                                                                                                                                                                                 | Lighthouse Lab in Milton Keynes                                                                                                                                                                                     | Wellcome Sanger Institute for the COVID-19 Genomics UK (COG-UK) Consortium                       | The Lighthouse Lab in Milton Keynes and Alex Alderton, Roberto Amato, Sonia Goncalves, Ewan Harrison, David K. Jackson, Ian Johnston, Dominic Kwiatkowski, Cordelia Langford, John Sillitoe on behalf of the Wellcome Sanger Institute COVID-19 Surveillance Team                                                                                                                                                                                         |                                                                                                                                                                                                                                                                                              |
| EPI_ISL_721987, EPI_ISL_721988, EPI_ISL_721990, EPI_ISL_721993, EPI_ISL_721994, EPI_ISL_721995, EPI_ISL_721996, EPI_ISL_721999, EPI_ISL_722002, EPI_ISL_722004, EPI_ISL_722014, EPI_ISL_722016, EPI_ISL_722017, EPI_ISL_722018, EPI_ISL_722019, EPI_ISL_722020, EPI_ISL_722022, EPI_ISL_722023, EPI_ISL_722024, EPI_ISL_722026, EPI_ISL_722027, EPI_ISL_722029, EPI_ISL_722032, EPI_ISL_722033, EPI_ISL_722034, EPI_ISL_722036, EPI_ISL_722037, EPI_ISL_722038, EPI_ISL_722040, EPI_ISL_722044, EPI_ISL_722045, EPI_ISL_722046, EPI_ISL_722047, EPI_ISL_722048, EPI_ISL_722050, EPI_ISL_722051, EPI_ISL_722052, EPI_ISL_722053, EPI_ISL_722054, EPI_ISL_722055, EPI_ISL_722057, EPI_ISL_722058, EPI_ISL_722062, EPI_ISL_722063, EPI_ISL_722064, EPI_ISL_722065, EPI_ISL_722066, EPI_ISL_722068, EPI_ISL_722069, EPI_ISL_722070, EPI_ISL_722071, EPI_ISL_722074, EPI_ISL_722075, EPI_ISL_722076, EPI_ISL_722077, EPI_ISL_722078, EPI_ISL_722079, EPI_ISL_722080, EPI_ISL_722082, EPI_ISL_722083, EPI_ISL_722084, EPI_ISL_722085, EPI_ISL_722086, EPI_ISL_722087, EPI_ISL_722089, EPI_ISL_722091, EPI_ISL_722092, EPI_ISL_722094, EPI_ISL_722097, EPI_ISL_722098, EPI_ISL_722099, EPI_ISL_722100, EPI_ISL_722101, EPI_ISL_722104, EPI_ISL_722105, EPI_ISL_722107, EPI_ISL_722108, EPI_ISL_722109, EPI_ISL_722110, EPI_ISL_722111, EPI_ISL_722113, EPI_ISL_722114, EPI_ISL_722116, EPI_ISL_722117, EPI_ISL_722118, EPI_ISL_722119, EPI_ISL_722121, EPI_ISL_722123, EPI_ISL_722124, EPI_ISL_722125, EPI_ISL_722127, EPI_ISL_722128 | Hospital das Clínicas Universidade de São Paulo Medical School                                                                                                                                                      | Laboratório de Parasitologia Médica - Instituto de Medicina Tropical - Universidade de São Paulo | Brazil-UK Centre for Arbovirus Discovery Diagnosis Genomics and Epidemiology (CADDE) Genomic Network - Instituto de Medicina Tropical                                                                                                                                                                                                                                                                                                                     |                                                                                                                                                                                                                                                                                              |
| EPI_ISL_722131, EPI_ISL_722132, EPI_ISL_722133                                                                                                                                                                                                                                                                                                                                                                                                                                                                                                                                                                                                                                                                                                                                                                                                                                                                                                                                                                                                                                                                                                                                                                                                                                                                                                                                                                                                                                                                                 | Instituto de Medicina Tropical Universidade de São Paulo                                                                                                                                                            | Laboratório de Parasitologia Médica - Instituto de Medicina Tropical - Universidade de São Paulo | Brazil-UK Centre for Arbovirus Discovery Diagnosis Genomics and Epidemiology (CADDE) Genomic Network - Instituto de Medicina Tropical                                                                                                                                                                                                                                                                                                                     |                                                                                                                                                                                                                                                                                              |
| EPI_ISL_722134, EPI_ISL_722135, EPI_ISL_722141, EPI_ISL_722142, EPI_ISL_722159, EPI_ISL_722162, EPI_ISL_722165                                                                                                                                                                                                                                                                                                                                                                                                                                                                                                                                                                                                                                                                                                                                                                                                                                                                                                                                                                                                                                                                                                                                                                                                                                                                                                                                                                                                                 | DB Diagnosticos do Brasil                                                                                                                                                                                           | Laboratório de Parasitologia Médica - Instituto de Medicina Tropical - Universidade de São Paulo | Brazil-UK Centre for Arbovirus Discovery Diagnosis Genomics and Epidemiology (CADDE) Genomic Network - Instituto de Medicina Tropical                                                                                                                                                                                                                                                                                                                     |                                                                                                                                                                                                                                                                                              |
| EPI_ISL_723936                                                                                                                                                                                                                                                                                                                                                                                                                                                                                                                                                                                                                                                                                                                                                                                                                                                                                                                                                                                                                                                                                                                                                                                                                                                                                                                                                                                                                                                                                                                 | Department of Pathology, University of Cambridge                                                                                                                                                                    | COVID-19 Genomics UK (COG-UK) Consortium                                                         | Aminu S. Jahun, Yasmin Chaudhry, Grant Hall, Iliana Georgana, Myra Hosmillo, Martin D. Curran, Malte Pinckert, Surendra Parmar, Ian Goodfellow                                                                                                                                                                                                                                                                                                            |                                                                                                                                                                                                                                                                                              |
| EPI_ISL_724066, EPI_ISL_724072, EPI_ISL_724096, EPI_ISL_724115                                                                                                                                                                                                                                                                                                                                                                                                                                                                                                                                                                                                                                                                                                                                                                                                                                                                                                                                                                                                                                                                                                                                                                                                                                                                                                                                                                                                                                                                 | Northumbria University / South Tees Hospitals NHS Foundation Trust / North Cumbria Integrated Care NHS Foundation Trust / North Tees and Hartlepool NHS Foundation Trust / Newcastle Hospitals NHS Foundation Trust | COVID-19 Genomics UK (COG-UK) Consortium                                                         | Darren L Smith, Andrew Nelson, Matthew Bashton, Greg R Young, Joshua Loh, John Allan, Mohammad A Tariq, Giles S Holt, Gary Black, Wen C Yew, Lynn Dover, Paul Baker, Steve Liggett, Sarah Essex, Jane Greenaway, Debra Padgett, Clive Graham, Garren Scott, Edward Barton, Emma Swindells, Brendan Payne, Jennifer Collins, Yusri Taha, Gary Eltringham                                                                                                   |                                                                                                                                                                                                                                                                                              |
| EPI_ISL_724217                                                                                                                                                                                                                                                                                                                                                                                                                                                                                                                                                                                                                                                                                                                                                                                                                                                                                                                                                                                                                                                                                                                                                                                                                                                                                                                                                                                                                                                                                                                 | West of Scotland Specialist Virology Centre, NHSGGC / MRC-University of Glasgow Centre for Virus Research                                                                                                           | COVID-19 Genomics UK (COG-UK) Consortium                                                         | Ana da Silva Filipe, Natasha Johnson, Kathy Smollett, Daniel Mair, Stephen Carmichael, Alice Broos, Lily Tong, Jenna Nichols, Kyriaki Nomikou; Sarah McDonald; Richard Orton, Joseph Hughes, Sreenu Vattipally, David L Robertson; Alasdair MacLean, Rory Gunson; Sharif Shaaban, Matthew Holden; Rachel Blacow, Guy Mollett, Kathy Li, James Shepherd, Antonia Ho, Emma Thomson                                                                          |                                                                                                                                                                                                                                                                                              |
| EPI_ISL_724604                                                                                                                                                                                                                                                                                                                                                                                                                                                                                                                                                                                                                                                                                                                                                                                                                                                                                                                                                                                                                                                                                                                                                                                                                                                                                                                                                                                                                                                                                                                 | University College London, Great Ormond Street Hospital for Children NHS Foundation Trust, Imperial College Healthcare NHS Trust                                                                                    | COVID-19 Genomics UK (COG-UK) Consortium                                                         | Sergi Castellano, Rachel Williams, Mark Kristiansen, Paola Resende Silva, Sunando Roy, Tony Brooks, Helena Tutill, Paola Niola, Patricia Dyal, Charlotte Williams, Leysa Forrest, Yasmin Panchbhaya, Jacqueline Findlay, Samuel Weeks, Julianne Brown, Kathryn Harris, Paul Randell, James Price, Alison Holmes, Judith Breuer                                                                                                                            |                                                                                                                                                                                                                                                                                              |
| EPI_ISL_725373                                                                                                                                                                                                                                                                                                                                                                                                                                                                                                                                                                                                                                                                                                                                                                                                                                                                                                                                                                                                                                                                                                                                                                                                                                                                                                                                                                                                                                                                                                                 | Quadram Institute Bioscience                                                                                                                                                                                        | COVID-19 Genomics UK (COG-UK) Consortium                                                         | Dave J. Baker, Gemma L. Kay, Alp Aydin, Thanh Le-Viet, Steven Rudder, Ana P. Tedim, Anastasia Kolyva, Maria Diaz, Leonardo de Oliveira Martins, Nabil-Fareed Alikhan, Lizzie Meadows, Rachael Stanley, Ngozi Elumogo, Muhammed Yasin, Nicholas M. Thomson, Alexander J Trotter, Rachel Gilroy, Samuel Bloomfield, Claire Stuart, Andrew Bell, Reenesh Prakash, Samir Dervisevic, Alison E. Mather, John Wain, Mark Webber, Andrew J. Page, Justin O'Grady |                                                                                                                                                                                                                                                                                              |
| EPI_ISL_725918, EPI_ISL_725981, EPI_ISL_726377, EPI_ISL_726615                                                                                                                                                                                                                                                                                                                                                                                                                                                                                                                                                                                                                                                                                                                                                                                                                                                                                                                                                                                                                                                                                                                                                                                                                                                                                                                                                                                                                                                                 | Wales Specialist Virology Centre Sequencing lab: Pathogen Genomics Unit                                                                                                                                             | COVID-19 Genomics UK (COG-UK) Consortium                                                         | Catherine Moore, Johnathan Evans, Laura Gifford, Malorie Perry, Simon Cottrell, Angela Marchbank, Alec Birchley, Alexander Adams, Amy Gaskin, Bree Gatica-Wilcox, Jason Coombes, Joel Southgate, Lauren Gilbert, Lee Graham, Nicole Pacchiarini, Sara Kumziene-Summerhayes, Sarah Taylor, Sophie Jones, Sara Rey, Matthew Bull, Joanne Watkins, Sally Corden, Tom Connor                                                                                  |                                                                                                                                                                                                                                                                                              |
| EPI_ISL_727721                                                                                                                                                                                                                                                                                                                                                                                                                                                                                                                                                                                                                                                                                                                                                                                                                                                                                                                                                                                                                                                                                                                                                                                                                                                                                                                                                                                                                                                                                                                 | Centre for Enzyme Innovation, University of Portsmouth / Translational Research Laboratory, Portsmouth Hospitals NHS Trust                                                                                          | COVID-19 Genomics UK (COG-UK) Consortium                                                         | Angela Beckett, Yann Bourgeois, Garry Scarlett, Sharon Glaysher, Scott Elliott, Kelly Bicknell, Robert Impey, Allyson Lloyd, Sarah Wyllie, Ethan Butcher, Anoop Chauhan, Samuel Robson                                                                                                                                                                                                                                                                    |                                                                                                                                                                                                                                                                                              |
| EPI_ISL_728187                                                                                                                                                                                                                                                                                                                                                                                                                                                                                                                                                                                                                                                                                                                                                                                                                                                                                                                                                                                                                                                                                                                                                                                                                                                                                                                                                                                                                                                                                                                 | National Public Health Laboratory, National Centre for Infectious Diseases                                                                                                                                          | National Public Health Laboratory, National Centre for Infectious Diseases                       | Tze Minn Mak, Sophie Octavia, Zhenyang Zhou, Lin Cui, Raymond Tzer Pin Lin                                                                                                                                                                                                                                                                                                                                                                                |                                                                                                                                                                                                                                                                                              |
| EPI_ISL_728888                                                                                                                                                                                                                                                                                                                                                                                                                                                                                                                                                                                                                                                                                                                                                                                                                                                                                                                                                                                                                                                                                                                                                                                                                                                                                                                                                                                                                                                                                                                 | Viollier AG                                                                                                                                                                                                         | Department of Biosystems Science and Engineering, ETH Zürich                                     | Chaoran Chen, Sarah Nadeau, Catharine Aquino, Ivan Topolsky, Pedro Ferreira, Philipp Jablonski, Susana Posada-Céspedes, Andreia Cabral de Gouvea, Maria Domenica Moccia, Simon Grüter, Timothy Sykes, Lennart Opitz, Ralph Schlapbach, Christiane Beckmann, Maurice Redondo, Olivier Kobel, Christoph Noppen, Sophie Seidel, Noemie Santamaria de Souza, Niko Beerenvinkel, Tarja Stadler                                                                 |                                                                                                                                                                                                                                                                                              |
| EPI_ISL_729744, EPI_ISL_729748, EPI_ISL_729754                                                                                                                                                                                                                                                                                                                                                                                                                                                                                                                                                                                                                                                                                                                                                                                                                                                                                                                                                                                                                                                                                                                                                                                                                                                                                                                                                                                                                                                                                 | Connecticut Department of Health                                                                                                                                                                                    | Grubaugh Lab - Yale School of Public Health                                                      | Joseph Fauver, Tara Alpert, Anderson Brito, Annie Watkins, Anne Wyllie, Chantal Vogels, Mary Petrone, Chaney Kalinich, Isabel Ott, Amau Casanovas, Catherine Muenker, Adam Moore, Alice Lu, Maria Tokuyama, Patrick Wong, Peiwen Lu, Saad Omer, Richard Martinello, Allison Nelson, Shelli Farhadian, Akiko Iwasaki, Charlese Dela Cruz, Albert Ko, Nathan Grubaugh                                                                                       |                                                                                                                                                                                                                                                                                              |
| EPI_ISL_729799, EPI_ISL_729801, EPI_ISL_729803, EPI_ISL_729805, EPI_ISL_729806, EPI_ISL_729808, EPI_ISL_729813, EPI_ISL_729840, EPI_ISL_729852, EPI_ISL_729853, EPI_ISL_729854, EPI_ISL_729856, EPI_ISL_729861                                                                                                                                                                                                                                                                                                                                                                                                                                                                                                                                                                                                                                                                                                                                                                                                                                                                                                                                                                                                                                                                                                                                                                                                                                                                                                                 | see above                                                                                                                                                                                                           | Laboratório Central de Saude Publica do Estado do Rio Grande do Sul (LACEN-RS)                   | Paola Resende, Luciana Appolinario, Fernando Motta, Anna Carolina Paixão, Ana Carolina Mendonça, Tatiana Schaffer Gregianini, Marilda Tereza Mar da Rosa, Marilda Siqueira                                                                                                                                                                                                                                                                                |                                                                                                                                                                                                                                                                                              |
| EPI_ISL_730661                                                                                                                                                                                                                                                                                                                                                                                                                                                                                                                                                                                                                                                                                                                                                                                                                                                                                                                                                                                                                                                                                                                                                                                                                                                                                                                                                                                                                                                                                                                 | Lighthouse Lab in Alderley Park                                                                                                                                                                                     | Wellcome Sanger Institute for the COVID-19 Genomics UK (COG-UK) Consortium                       | Jacquelyn Wynn, Mairead Hyland, The Lighthouse Lab in Alderley Park and Alex Alderton, Roberto Amato, Sonia Goncalves, Ewan Harrison, David K. Jackson, Ian Johnston, Dominic Kwiatkowski, Cordelia Langford, John Sillitoe on behalf of the Wellcome Sanger Institute COVID-19 Surveillance Team                                                                                                                                                         |                                                                                                                                                                                                                                                                                              |
| EPI_ISL_732044, EPI_ISL_732052                                                                                                                                                                                                                                                                                                                                                                                                                                                                                                                                                                                                                                                                                                                                                                                                                                                                                                                                                                                                                                                                                                                                                                                                                                                                                                                                                                                                                                                                                                 | Instituto Nacional de Saude (INSA)                                                                                                                                                                                  | Instituto Nacional de Saude (INSA)                                                               | Borges et al                                                                                                                                                                                                                                                                                                                                                                                                                                              |                                                                                                                                                                                                                                                                                              |
| EPI_ISL_732179, EPI_ISL_732180, EPI_ISL_732181, EPI_ISL_732183, EPI_ISL_732184, EPI_ISL_732252                                                                                                                                                                                                                                                                                                                                                                                                                                                                                                                                                                                                                                                                                                                                                                                                                                                                                                                                                                                                                                                                                                                                                                                                                                                                                                                                                                                                                                 | Instituto Nacional de Saude (INSA) and Instituto Gulbenkian de Ciencia (IGC)                                                                                                                                        | Instituto Nacional de Saude (INSA) and Instituto Gulbenkian de Ciencia (IGC)                     | Borges et al                                                                                                                                                                                                                                                                                                                                                                                                                                              |                                                                                                                                                                                                                                                                                              |
| EPI_ISL_733121                                                                                                                                                                                                                                                                                                                                                                                                                                                                                                                                                                                                                                                                                                                                                                                                                                                                                                                                                                                                                                                                                                                                                                                                                                                                                                                                                                                                                                                                                                                 | HELIX LLC                                                                                                                                                                                                           | WHO National Influenza Centre Russian Federation                                                 | Andrey Komissarov, Artem Fadeev, Anna Ivanova, Kseniya Komissarova, Dmitry Bazhenov, Daria Danilenko, Ksenia Safina, Elena Nabieva, Georgii Bazynkin, Dmitry Lioznov                                                                                                                                                                                                                                                                                      |                                                                                                                                                                                                                                                                                              |
| EPI_ISL_733300                                                                                                                                                                                                                                                                                                                                                                                                                                                                                                                                                                                                                                                                                                                                                                                                                                                                                                                                                                                                                                                                                                                                                                                                                                                                                                                                                                                                                                                                                                                 | WHO National Influenza Centre Russian Federation                                                                                                                                                                    | WHO National Influenza Centre Russian Federation                                                 | Andrey Komissarov, Artem Fadeev, Anna Ivanova, Kseniya Komissarova, Dmitry Bazhenov, Daria Danilenko, Ksenia Safina, Elena Nabieva, Georgii Bazynkin, Dmitry Lioznov                                                                                                                                                                                                                                                                                      |                                                                                                                                                                                                                                                                                              |
| EPI_ISL_734865                                                                                                                                                                                                                                                                                                                                                                                                                                                                                                                                                                                                                                                                                                                                                                                                                                                                                                                                                                                                                                                                                                                                                                                                                                                                                                                                                                                                                                                                                                                 | UZ Leuven, National Reference Laboratory for Coronaviruses, Laboratory Medicine, Leuven, Belgium                                                                                                                    | KU Leuven, Rega Institute, Clinical and Epidemiological Virology                                 | Tony Wawina-Bokalanga, Joan Marti-Carerras, Bert Vanmechelen, Piet Maes                                                                                                                                                                                                                                                                                                                                                                                   |                                                                                                                                                                                                                                                                                              |
| EPI_ISL_735396                                                                                                                                                                                                                                                                                                                                                                                                                                                                                                                                                                                                                                                                                                                                                                                                                                                                                                                                                                                                                                                                                                                                                                                                                                                                                                                                                                                                                                                                                                                 | Hospital de Campanha COVID 19 SER                                                                                                                                                                                   | Instituto Adolfo Lutz, Interdisciplinary Procedures Center, Strategic Laboratory                 | Claudio Tavares Sacchi, Claudia Regina Gonçalves, Erica Valessa Ramos Gomes, Karoline Rodrigues Campos                                                                                                                                                                                                                                                                                                                                                    |                                                                                                                                                                                                                                                                                              |
| EPI_ISL_735397                                                                                                                                                                                                                                                                                                                                                                                                                                                                                                                                                                                                                                                                                                                                                                                                                                                                                                                                                                                                                                                                                                                                                                                                                                                                                                                                                                                                                                                                                                                 | Unidade Respiratória Nova Hortolandia                                                                                                                                                                               | Instituto Adolfo Lutz, Interdisciplinary Procedures Center, Strategic Laboratory                 | Claudio Tavares Sacchi, Claudia Regina Gonçalves, Erica Valessa Ramos Gomes, Karoline Rodrigues Campos                                                                                                                                                                                                                                                                                                                                                    |                                                                                                                                                                                                                                                                                              |
| EPI_ISL_735398                                                                                                                                                                                                                                                                                                                                                                                                                                                                                                                                                                                                                                                                                                                                                                                                                                                                                                                                                                                                                                                                                                                                                                                                                                                                                                                                                                                                                                                                                                                 | Laboratorio Fleury                                                                                                                                                                                                  | Instituto Adolfo Lutz, Interdisciplinary Procedures Center, Strategic Laboratory                 | Claudio Tavares Sacchi, Claudia Regina Gonçalves, Erica Valessa Ramos Gomes, Karoline Rodrigues Campos                                                                                                                                                                                                                                                                                                                                                    |                                                                                                                                                                                                                                                                                              |
| EPI_ISL_735399                                                                                                                                                                                                                                                                                                                                                                                                                                                                                                                                                                                                                                                                                                                                                                                                                                                                                                                                                                                                                                                                                                                                                                                                                                                                                                                                                                                                                                                                                                                 | Hospital Municipal Dr Ignacio de gouvea                                                                                                                                                                             | Instituto Adolfo Lutz, Interdisciplinary Procedures Center, Strategic Laboratory                 | Claudio Tavares Sacchi, Claudia Regina Gonçalves, Erica Valessa Ramos Gomes, Karoline Rodrigues Campos                                                                                                                                                                                                                                                                                                                                                    |                                                                                                                                                                                                                                                                                              |
| EPI_ISL_735400                                                                                                                                                                                                                                                                                                                                                                                                                                                                                                                                                                                                                                                                                                                                                                                                                                                                                                                                                                                                                                                                                                                                                                                                                                                                                                                                                                                                                                                                                                                 | Instituto Adolfo Lutz - Regional de Santos                                                                                                                                                                          | Instituto Adolfo Lutz, Interdisciplinary Procedures Center, Strategic Laboratory                 | Claudio Tavares Sacchi, Claudia Regina Gonçalves, Erica Valessa Ramos Gomes, Karoline Rodrigues Campos                                                                                                                                                                                                                                                                                                                                                    |                                                                                                                                                                                                                                                                                              |

|                                                                |                                                                                                                                        |                                                                                                                                        |                                                                                                                                                                                                                                                                                                                                                                                                                                                                                                                                                                                                                                                     |
|----------------------------------------------------------------|----------------------------------------------------------------------------------------------------------------------------------------|----------------------------------------------------------------------------------------------------------------------------------------|-----------------------------------------------------------------------------------------------------------------------------------------------------------------------------------------------------------------------------------------------------------------------------------------------------------------------------------------------------------------------------------------------------------------------------------------------------------------------------------------------------------------------------------------------------------------------------------------------------------------------------------------------------|
| EPI_ISL_735401, EPI_ISL_735402, EPI_ISL_735403, EPI_ISL_735404 | Instituto Adolfo Lutz - Regional de Rio Claro                                                                                          | Instituto Adolfo Lutz, Interdisciplinary Procedures Center, Strategic Laboratory                                                       | Claudio Tavares Sacchi, Claudia Regina Gonçalves, Erica Valessa Ramos Gomes, Karoline Rodrigues Campos                                                                                                                                                                                                                                                                                                                                                                                                                                                                                                                                              |
| EPI_ISL_735406                                                 | Unidade de Pronto Atendimento UPA I Sta Isabel                                                                                         | Instituto Adolfo Lutz, Interdisciplinary Procedures Center, Strategic Laboratory                                                       | Claudio Tavares Sacchi, Claudia Regina Gonçalves, Erica Valessa Ramos Gomes, Karoline Rodrigues Campos                                                                                                                                                                                                                                                                                                                                                                                                                                                                                                                                              |
| EPI_ISL_735408                                                 | COVID 19 Centro de Combate ao Coronavirus CCC Jandira                                                                                  | Instituto Adolfo Lutz, Interdisciplinary Procedures Center, Strategic Laboratory                                                       | Claudio Tavares Sacchi, Claudia Regina Gonçalves, Erica Valessa Ramos Gomes, Karoline Rodrigues Campos                                                                                                                                                                                                                                                                                                                                                                                                                                                                                                                                              |
| EPI_ISL_735409                                                 | Unidade de Pronto Atendimento Carlos Lourenco                                                                                          | Instituto Adolfo Lutz, Interdisciplinary Procedures Center, Strategic Laboratory                                                       | Claudio Tavares Sacchi, Claudia Regina Gonçalves, Erica Valessa Ramos Gomes, Karoline Rodrigues Campos                                                                                                                                                                                                                                                                                                                                                                                                                                                                                                                                              |
| EPI_ISL_735411                                                 | Centro de Vigilancia a Saude de Diadema                                                                                                | Instituto Adolfo Lutz, Interdisciplinary Procedures Center, Strategic Laboratory                                                       | Claudio Tavares Sacchi, Claudia Regina Gonçalves, Erica Valessa Ramos Gomes, Karoline Rodrigues Campos                                                                                                                                                                                                                                                                                                                                                                                                                                                                                                                                              |
| EPI_ISL_735412                                                 | Hospital e Pronto Socorro Portinari                                                                                                    | Instituto Adolfo Lutz, Interdisciplinary Procedures Center, Strategic Laboratory                                                       | Claudio Tavares Sacchi, Claudia Regina Gonçalves, Erica Valessa Ramos Gomes, Karoline Rodrigues Campos                                                                                                                                                                                                                                                                                                                                                                                                                                                                                                                                              |
| EPI_ISL_735413                                                 | Militello Centro de Diagnosticos e Biopesquisa Clinica                                                                                 | Instituto Adolfo Lutz, Interdisciplinary Procedures Center, Strategic Laboratory                                                       | Claudio Tavares Sacchi, Claudia Regina Gonçalves, Erica Valessa Ramos Gomes, Karoline Rodrigues Campos                                                                                                                                                                                                                                                                                                                                                                                                                                                                                                                                              |
| EPI_ISL_735417                                                 | Unidade de Pronto Atendimento de Agenor de Campos                                                                                      | Instituto Adolfo Lutz, Interdisciplinary Procedures Center, Strategic Laboratory                                                       | Claudio Tavares Sacchi, Claudia Regina Gonçalves, Erica Valessa Ramos Gomes, Karoline Rodrigues Campos                                                                                                                                                                                                                                                                                                                                                                                                                                                                                                                                              |
| EPI_ISL_735419                                                 | UBS Alvarenga                                                                                                                          | Instituto Adolfo Lutz, Interdisciplinary Procedures Center, Strategic Laboratory                                                       | Claudio Tavares Sacchi, Claudia Regina Gonçalves, Erica Valessa Ramos Gomes, Karoline Rodrigues Campos                                                                                                                                                                                                                                                                                                                                                                                                                                                                                                                                              |
| EPI_ISL_735421                                                 | UBS Sta Terezinha                                                                                                                      | Instituto Adolfo Lutz, Interdisciplinary Procedures Center, Strategic Laboratory                                                       | Claudio Tavares Sacchi, Claudia Regina Gonçalves, Erica Valessa Ramos Gomes, Karoline Rodrigues Campos                                                                                                                                                                                                                                                                                                                                                                                                                                                                                                                                              |
| EPI_ISL_735422                                                 | UBS Dematchi                                                                                                                           | Instituto Adolfo Lutz, Interdisciplinary Procedures Center, Strategic Laboratory                                                       | Claudio Tavares Sacchi, Claudia Regina Gonçalves, Erica Valessa Ramos Gomes, Karoline Rodrigues Campos                                                                                                                                                                                                                                                                                                                                                                                                                                                                                                                                              |
| EPI_ISL_735423, EPI_ISL_735424, EPI_ISL_735426                 | Centro de Vigilancia a Saude de Diadema                                                                                                | Instituto Adolfo Lutz, Interdisciplinary Procedures Center, Strategic Laboratory                                                       | Claudio Tavares Sacchi, Claudia Regina Gonçalves, Erica Valessa Ramos Gomes, Karoline Rodrigues Campos                                                                                                                                                                                                                                                                                                                                                                                                                                                                                                                                              |
| EPI_ISL_735428, EPI_ISL_735429, EPI_ISL_735431                 | Hospital Nipo Brasileiro                                                                                                               | Instituto Adolfo Lutz, Interdisciplinary Procedures Center, Strategic Laboratory                                                       | Claudio Tavares Sacchi, Claudia Regina Gonçalves, Erica Valessa Ramos Gomes, Karoline Rodrigues Campos                                                                                                                                                                                                                                                                                                                                                                                                                                                                                                                                              |
| EPI_ISL_735433                                                 | Posto de Atendimento Saude Cidade Pasc Cajati                                                                                          | Instituto Adolfo Lutz, Interdisciplinary Procedures Center, Strategic Laboratory                                                       | Claudio Tavares Sacchi, Claudia Regina Gonçalves, Erica Valessa Ramos Gomes, Karoline Rodrigues Campos                                                                                                                                                                                                                                                                                                                                                                                                                                                                                                                                              |
| EPI_ISL_743832                                                 | Wales Specialist Virology Centre Sequencing lab: Pathogen Genomics Unit                                                                | COVID-19 Genomics UK (COG-UK) Consortium                                                                                               | Catherine Moore, Johnathan Evans, Laura Gifford, Malorie Perry, Simon Cottrell, Angela Marchbank, Alec Birchley, Alexander Adams, Amy Gaskin, Bree Gatica-Wilcox, Jason Coombes, Joel Southgate, Lauren Gilbert, Lee Graham, Nicole Pacchiarini, Sara Kumziene-Summerhayes, Sarah Taylor, Sophie Jones, Sara Rey, Matthew Bull, Joanne Watkins, Sally Corden, Tom Connor                                                                                                                                                                                                                                                                            |
| EPI_ISL_745827, EPI_ISL_745855                                 | Ginkgo Bioworks Clinical Laboratory                                                                                                    | Utah Public Health Laboratory                                                                                                          | Erin L. Young, Kelly Oakeson, Tara Gallagher, Michael T. Pyne, E. Susan Slechta, Melanie A. Mallory, Jeffrey B. Stevenson, Salika M. Shakir, David R. Hillyard, Malaika McKenzie-Bennett, James McGann, Jim Griffin, Keith Robison, Alex Plocik, Becky Schilling, Martha Pierson, Rebecca Littlefield, Michelle Spencer, Birgitte Simen                                                                                                                                                                                                                                                                                                             |
| EPI_ISL_746686                                                 | Genetica Molecular and Subdepartamento de Virologia ISP Chile                                                                          | Instituto de Salud Publica de Chile                                                                                                    | Javier Tognarelli, Barbara Parra, Loredana Arata, Jaime Lagos, Gisselle Barra, Patricia Bustos, Rodrigo Fasce, Andres Castillo, Jorge Fernandez                                                                                                                                                                                                                                                                                                                                                                                                                                                                                                     |
| EPI_ISL_747337                                                 | Division of Emerging Infectious Diseases, Bureau of Infectious Diseases Diagnosis Control, Korea Disease Control and Prevention Agency | Division of Emerging Infectious Diseases, Bureau of Infectious Diseases Diagnosis Control, Korea Disease Control and Prevention Agency | Ae Kyung Park, Il-Hwan Kim, Heui Man Kim, Jeong-Min Kim, Namjoo Lee, Chaeyoung Lee, Sang Hee Woo, Eun-Jin Kim                                                                                                                                                                                                                                                                                                                                                                                                                                                                                                                                       |
| EPI_ISL_750175                                                 | CENUR Este-Sede Rocha-UdelaR                                                                                                           | Institut Pasteur de Montevideo                                                                                                         | Daiana Mir, Natalia Rego, Paola Cristina Resende, Fernando Lopez-Tort, Tamara Fernandez-Calero, Veronica Noya, Mariana Brandes, Tania Possi, Mailen Arleo, Natalia Reyes, Matias Victoria, Andres Lizasoain, Matias Castells, Leticia Maya, Matias Salvo, Tatiana Schäffer Gregianini, Marilda Tereza Mar da Rosa, Leticia Garay Martins, Cecilia Alonso, Yasser Vega, Cecilia Salazar, Ignacio Ferrés, Pablo Smircich, Jose Sotelo, Ighor Arantes, Luciana Appolinario, Ana Carolina Mendonça, Maria Jose Benitez-Galeano, Martín Graña, Camila Simoes, Fernando Motta, Marilda Mendonça Siqueira, Gonzalo Bello, Rodney Colina, Lucia Spangenberg |
| EPI_ISL_750176                                                 | Sanatorio Americano                                                                                                                    | Institut Pasteur de Montevideo                                                                                                         | Daiana Mir, Natalia Rego, Paola Cristina Resende, Fernando Lopez-Tort, Tamara Fernandez-Calero, Veronica Noya, Mariana Brandes, Tania Possi, Mailen Arleo, Natalia Reyes, Matias Victoria, Andres Lizasoain, Matias Castells, Leticia Maya, Matias Salvo, Tatiana Schäffer Gregianini, Marilda Tereza Mar da Rosa, Leticia Garay Martins, Cecilia Alonso, Yasser Vega, Cecilia Salazar, Ignacio Ferrés, Pablo Smircich, Jose Sotelo, Ighor Arantes, Luciana Appolinario, Ana Carolina Mendonça, Maria Jose Benitez-Galeano, Martín Graña, Camila Simoes, Fernando Motta, Marilda Mendonça Siqueira, Gonzalo Bello, Rodney Colina, Lucia Spangenberg |
| EPI_ISL_751184, EPI_ISL_751186                                 | CENUR Litoral Norte - UdelaR, Salto, Uruguay                                                                                           | Institut Pasteur de Montevideo                                                                                                         | Daiana Mir, Natalia Rego, Paola Cristina Resende, Fernando Lopez-Tort, Tamara Fernandez-Calero, Veronica Noya, Mariana Brandes, Tania Possi, Mailen Arleo, Natalia Reyes, Matias Victoria, Andres Lizasoain, Matias Castells, Leticia Maya, Matias Salvo, Tatiana Schäffer Gregianini, Marilda Tereza Mar da Rosa, Leticia Garay Martins, Cecilia Alonso, Yasser Vega, Cecilia Salazar, Ignacio Ferrés, Pablo Smircich, Jose Sotelo, Ighor Arantes, Luciana Appolinario, Ana Carolina Mendonça, Maria Jose Benitez-Galeano, Martín Graña, Camila Simoes, Fernando Motta, Marilda Mendonça Siqueira, Gonzalo Bello, Rodney Colina, Lucia Spangenberg |
| EPI_ISL_751201                                                 | Laboratorio DILAVE/MGAP-INIA-UdelaR - Tacuarembó                                                                                       | Institut Pasteur de Montevideo                                                                                                         | Daiana Mir, Natalia Rego, Paola Cristina Resende, Fernando Lopez-Tort, Tamara Fernandez-Calero, Veronica Noya, Mariana Brandes, Tania Possi, Mailen Arleo, Natalia Reyes, Matias Victoria, Andres Lizasoain, Matias Castells, Leticia Maya, Matias Salvo, Tatiana Schäffer Gregianini, Marilda Tereza Mar da Rosa, Leticia Garay Martins, Cecilia Alonso, Yasser Vega, Cecilia Salazar, Ignacio Ferrés, Pablo Smircich, Jose Sotelo, Ighor Arantes, Luciana Appolinario, Ana Carolina Mendonça, Maria Jose Benitez-Galeano, Martín Graña, Camila Simoes, Fernando Motta, Marilda Mendonça Siqueira, Gonzalo Bello, Rodney Colina, Lucia Spangenberg |
| EPI_ISL_754913                                                 | Laboratory Diagnostics and Clinical Immunology of Developmental Age, Medical University of Warsaw                                      | genXone SA, Research & Development Laboratory; The Faculty of Mathematics, Informatics and Mechanics of the University of Warsaw       | Maciej Sykulski, Grzegorz Nowicki, Monika Makowska-Woniak, Jakub Grabowski, Natalia Drwska-Matelska, ukasz Krych, Micha Kaszuba, Anna Gambin, Urszula Demkow                                                                                                                                                                                                                                                                                                                                                                                                                                                                                        |
| EPI_ISL_755640                                                 | Instituto Adolfo Lutz - Central                                                                                                        | Instituto Adolfo Lutz, Interdisciplinary Procedures Center, Strategic Laboratory                                                       | Claudio Tavares Sacchi, Claudia Regina Gonçalves, Erica Valessa Ramos Gomes, Karoline Rodrigues Campos                                                                                                                                                                                                                                                                                                                                                                                                                                                                                                                                              |
| EPI_ISL_755641                                                 | Instituto Adolfo Lutz - Regional de Santo Andre                                                                                        | Instituto Adolfo Lutz, Interdisciplinary Procedures Center, Strategic Laboratory                                                       | Claudio Tavares Sacchi, Claudia Regina Gonçalves, Erica Valessa Ramos Gomes, Karoline Rodrigues Campos                                                                                                                                                                                                                                                                                                                                                                                                                                                                                                                                              |
| EPI_ISL_755643                                                 | Instituto Adolfo Lutz - Central                                                                                                        | Instituto Adolfo Lutz, Interdisciplinary Procedures Center, Strategic Laboratory                                                       | Claudio Tavares Sacchi, Claudia Regina Gonçalves, Erica Valessa Ramos Gomes, Karoline Rodrigues Campos                                                                                                                                                                                                                                                                                                                                                                                                                                                                                                                                              |
| EPI_ISL_755644                                                 | Lab LOC - Itapeperica da Serra                                                                                                         | Instituto Adolfo Lutz, Interdisciplinary Procedures Center, Strategic Laboratory                                                       | Claudio Tavares Sacchi, Claudia Regina Gonçalves, Erica Valessa Ramos Gomes, Karoline Rodrigues Campos                                                                                                                                                                                                                                                                                                                                                                                                                                                                                                                                              |
| EPI_ISL_755646                                                 | Instituto Adolfo Lutz - Regional de Santo Andre                                                                                        | Instituto Adolfo Lutz, Interdisciplinary Procedures Center, Strategic Laboratory                                                       | Claudio Tavares Sacchi, Claudia Regina Gonçalves, Erica Valessa Ramos Gomes, Karoline Rodrigues Campos                                                                                                                                                                                                                                                                                                                                                                                                                                                                                                                                              |
| EPI_ISL_755648, EPI_ISL_755650                                 | Instituto Adolfo Lutz - Regional de Taubate                                                                                            | Instituto Adolfo Lutz, Interdisciplinary Procedures Center,                                                                            | Claudio Tavares Sacchi, Claudia Regina Gonçalves, Erica Valessa Ramos Gomes, Karoline Rodrigues Campos                                                                                                                                                                                                                                                                                                                                                                                                                                                                                                                                              |

|                                                                                                                                                                                                                                                                                                                                                                                                                |                                                                                                                                                                                                 |                                                                                                                    |                                                                                                                                                                                                                                                                                                                                                                                                                                                                             |
|----------------------------------------------------------------------------------------------------------------------------------------------------------------------------------------------------------------------------------------------------------------------------------------------------------------------------------------------------------------------------------------------------------------|-------------------------------------------------------------------------------------------------------------------------------------------------------------------------------------------------|--------------------------------------------------------------------------------------------------------------------|-----------------------------------------------------------------------------------------------------------------------------------------------------------------------------------------------------------------------------------------------------------------------------------------------------------------------------------------------------------------------------------------------------------------------------------------------------------------------------|
|                                                                                                                                                                                                                                                                                                                                                                                                                |                                                                                                                                                                                                 | Strategic Laboratory                                                                                               |                                                                                                                                                                                                                                                                                                                                                                                                                                                                             |
| EPI_ISL_75655                                                                                                                                                                                                                                                                                                                                                                                                  | Instituto Adolfo Lutz - Regional de Campinas                                                                                                                                                    | Instituto Adolfo Lutz, Interdisciplinary Procedures Center, Strategic Laboratory                                   | Claudio Tavares Sacchi, Claudia Regina Gonçalves, Erica Valessa Ramos Gomes, Karoline Rodrigues Campos                                                                                                                                                                                                                                                                                                                                                                      |
| EPI_ISL_757083, EPI_ISL_757234, EPI_ISL_757245, EPI_ISL_760740                                                                                                                                                                                                                                                                                                                                                 | Lighthouse Lab in Glasgow                                                                                                                                                                       | Wellcome Sanger Institute for the COVID-19 Genomics UK (COG-UK) Consortium                                         | Harper VanSteenhouse, Yumi Kasai, David Gray, Carol Clugston, Anna Dominiczak and Alex Alderton, Roberto Amato, Sonia Goncalves, Ewan Harrison, David K. Jackson, Ian Johnston, Dominic Kwiatkowski, Cordelia Langford, John Sillitoe on behalf of the Wellcome Sanger Institute COVID-19 Surveillance Team                                                                                                                                                                 |
| EPI_ISL_760881, EPI_ISL_760963                                                                                                                                                                                                                                                                                                                                                                                 | Lighthouse Lab in Milton Keynes                                                                                                                                                                 | Wellcome Sanger Institute for the COVID-19 Genomics UK (COG-UK) Consortium                                         | The Lighthouse Lab in Milton Keynes and Alex Alderton, Roberto Amato, Sonia Goncalves, Ewan Harrison, David K. Jackson, Ian Johnston, Dominic Kwiatkowski, Cordelia Langford, John Sillitoe on behalf of the Wellcome Sanger Institute COVID-19 Surveillance Team                                                                                                                                                                                                           |
| EPI_ISL_761920                                                                                                                                                                                                                                                                                                                                                                                                 | Lighthouse Lab in Alderley Park                                                                                                                                                                 | Wellcome Sanger Institute for the COVID-19 Genomics UK (COG-UK) Consortium                                         | Jacquelyn Wynn, Mairead Hyland, The Lighthouse Lab in Alderley Park and Alex Alderton, Roberto Amato, Sonia Goncalves, Ewan Harrison, David K. Jackson, Ian Johnston, Dominic Kwiatkowski, Cordelia Langford, John Sillitoe on behalf of the Wellcome Sanger Institute COVID-19 Surveillance Team                                                                                                                                                                           |
| EPI_ISL_764075                                                                                                                                                                                                                                                                                                                                                                                                 | Virology Department, Royal Infirmary of Edinburgh, NHS Lothian / School of Biological Sciences, University of Edinburgh / Institute of Genetics and Molecular Medicine, University of Edinburgh | COVID-19 Genomics UK (COG-UK) Consortium                                                                           | McHugh M, Dewar R, Rooke S, Gallagher M, Balcaza C, O'Toole Á, Scher E, Hill V, McCrone JT, Colquhoun R, Yu X, Jackson B, Rambaut A, Williams TC, Templeton K                                                                                                                                                                                                                                                                                                               |
| EPI_ISL_767143, EPI_ISL_767227                                                                                                                                                                                                                                                                                                                                                                                 | Lighthouse Lab in Alderley Park                                                                                                                                                                 | Wellcome Sanger Institute for the COVID-19 Genomics UK (COG-UK) Consortium                                         | Jacquelyn Wynn, Mairead Hyland, The Lighthouse Lab in Alderley Park and Alex Alderton, Roberto Amato, Sonia Goncalves, Ewan Harrison, David K. Jackson, Ian Johnston, Dominic Kwiatkowski, Cordelia Langford, John Sillitoe on behalf of the Wellcome Sanger Institute COVID-19 Surveillance Team                                                                                                                                                                           |
| EPI_ISL_770555, EPI_ISL_770558, EPI_ISL_770562, EPI_ISL_770569, EPI_ISL_770572, EPI_ISL_770573, EPI_ISL_770576, EPI_ISL_770577, EPI_ISL_770585, EPI_ISL_770586, EPI_ISL_770588, EPI_ISL_770590, EPI_ISL_770597, EPI_ISL_770599, EPI_ISL_770600, EPI_ISL_770601, EPI_ISL_770608, EPI_ISL_770609, EPI_ISL_770611, EPI_ISL_770614, EPI_ISL_770615, EPI_ISL_770623, EPI_ISL_770626, EPI_ISL_770627, EPI_ISL_770629 |                                                                                                                                                                                                 |                                                                                                                    |                                                                                                                                                                                                                                                                                                                                                                                                                                                                             |
| see above                                                                                                                                                                                                                                                                                                                                                                                                      | Laboratório de Microbiologia Molecular - Universidade FEEVALE                                                                                                                                   | Bioinformatics Laboratory / LNCC                                                                                   | Felipe Benites, Fernando Rosado Spilki, Alana Witt Hansen, Juliane Deise Fleck, Juliana Schons, Meriane Demoliner, Ana Karolina Eisen Antunes, Fagner Henrique Heldt, Larissa Mallmann, Bruna Hermann, Ana Luiza Ziulkoski, Vyctoria Goes, Karoline Schallenger, Matheus Nunes Weber, Paula Rodrigues de Almeida, Alessandra Pavan Lamarca da Silva, Ronaldo da Silva F Jr., Luiz G P de Almeida, Alexandra L Gerber, Ana Paula de C Guimarães, Ana Tereza R de Vasconcelos |
| EPI_ISL_776750, EPI_ISL_776752, EPI_ISL_776753, EPI_ISL_776755, EPI_ISL_776756                                                                                                                                                                                                                                                                                                                                 | Instituto Adolfo Lutz - Central                                                                                                                                                                 | Instituto Adolfo Lutz, Interdisciplinary Procedures Center, Strategic Laboratory                                   | Claudio Tavares Sacchi, Claudia Regina Gonçalves, Erica Valessa Ramos Gomes, Karoline Rodrigues Campos                                                                                                                                                                                                                                                                                                                                                                      |
| EPI_ISL_776757, EPI_ISL_776758                                                                                                                                                                                                                                                                                                                                                                                 | Instituto Adolfo Lutz - Regional de Marília                                                                                                                                                     | Instituto Adolfo Lutz, Interdisciplinary Procedures Center, Strategic Laboratory                                   | Claudio Tavares Sacchi, Claudia Regina Gonçalves, Erica Valessa Ramos Gomes, Karoline Rodrigues Campos                                                                                                                                                                                                                                                                                                                                                                      |
| EPI_ISL_776761                                                                                                                                                                                                                                                                                                                                                                                                 | Instituto Adolfo Lutz - Central                                                                                                                                                                 | Instituto Adolfo Lutz, Interdisciplinary Procedures Center, Strategic Laboratory                                   | Claudio Tavares Sacchi, Claudia Regina Gonçalves, Erica Valessa Ramos Gomes, Karoline Rodrigues Campos                                                                                                                                                                                                                                                                                                                                                                      |
| EPI_ISL_776764, EPI_ISL_776765, EPI_ISL_776766                                                                                                                                                                                                                                                                                                                                                                 | Instituto Adolfo Lutz - Regional de Santo Andre                                                                                                                                                 | Instituto Adolfo Lutz, Interdisciplinary Procedures Center, Strategic Laboratory                                   | Claudio Tavares Sacchi, Claudia Regina Gonçalves, Erica Valessa Ramos Gomes, Karoline Rodrigues Campos                                                                                                                                                                                                                                                                                                                                                                      |
| EPI_ISL_776767                                                                                                                                                                                                                                                                                                                                                                                                 | Instituto Adolfo Lutz - Regional de Marília                                                                                                                                                     | Instituto Adolfo Lutz, Interdisciplinary Procedures Center, Strategic Laboratory                                   | Claudio Tavares Sacchi, Claudia Regina Gonçalves, Erica Valessa Ramos Gomes, Karoline Rodrigues Campos                                                                                                                                                                                                                                                                                                                                                                      |
| EPI_ISL_779156, EPI_ISL_779160, EPI_ISL_779161, EPI_ISL_779162, EPI_ISL_779163, EPI_ISL_779165, EPI_ISL_779166, EPI_ISL_779167, EPI_ISL_779168                                                                                                                                                                                                                                                                 | Laboratório de Microbiologia Molecular - Universidade FEEVALE                                                                                                                                   | Bioinformatics Laboratory / LNCC                                                                                   | Felipe Benites, Fernando Rosado Spilki, Alana Witt Hansen, Juliane Deise Fleck, Juliana Schons, Meriane Demoliner, Ana Karolina Eisen Antunes, Fagner Henrique Heldt, Larissa Mallmann, Bruna Hermann, Ana Luiza Ziulkoski, Vyctoria Goes, Karoline Schallenger, Matheus Nunes Weber, Paula Rodrigues de Almeida, Alessandra Pavan Lamarca da Silva, Ronaldo da Silva F Jr., Luiz G P de Almeida, Alexandra L Gerber, Ana Paula de C Guimarães, Ana Tereza R de Vasconcelos |
| EPI_ISL_779617                                                                                                                                                                                                                                                                                                                                                                                                 | Victorian Infectious Diseases Reference Laboratory (VIDRL)                                                                                                                                      | VIDRL and MDU-PHL                                                                                                  | Caly L., Seemann T., Sait, M.L., Druce J., Sherry, N.L.                                                                                                                                                                                                                                                                                                                                                                                                                     |
| EPI_ISL_781370                                                                                                                                                                                                                                                                                                                                                                                                 | Lighthouse Lab in Milton Keynes                                                                                                                                                                 | Wellcome Sanger Institute for the COVID-19 Genomics UK (COG-UK) Consortium                                         | The Lighthouse Lab in Milton Keynes and Alex Alderton, Roberto Amato, Sonia Goncalves, Ewan Harrison, David K. Jackson, Ian Johnston, Dominic Kwiatkowski, Cordelia Langford, John Sillitoe on behalf of the Wellcome Sanger Institute COVID-19 Surveillance Team                                                                                                                                                                                                           |
| EPI_ISL_790234                                                                                                                                                                                                                                                                                                                                                                                                 | Houston Methodist Hospital                                                                                                                                                                      | Houston Methodist Hospital                                                                                         | S. Wesley Long, Randall J. Olsen, Paul A. Christensen, David W. Bernard, James J. Davis, Maulik Shukla, Marcus Nguyen, Matthew Ojeda Saavedra, Prasanti Yerramilli, Layne Pruitt, Sishir Subedi, Heather Hendrickson, and James M. Musser                                                                                                                                                                                                                                   |
| EPI_ISL_792101, EPI_ISL_792102                                                                                                                                                                                                                                                                                                                                                                                 | Instituto Adolfo Lutz - Central                                                                                                                                                                 | Instituto Adolfo Lutz, Interdisciplinary Procedures Center, Strategic Laboratory                                   | Claudio Tavares Sacchi, Claudia Regina Gonçalves, Erica Valessa Ramos Gomes, Karoline Rodrigues Campos                                                                                                                                                                                                                                                                                                                                                                      |
| EPI_ISL_792103                                                                                                                                                                                                                                                                                                                                                                                                 | Instituto Adolfo Lutz - Regional de Santo Andre                                                                                                                                                 | Instituto Adolfo Lutz, Interdisciplinary Procedures Center, Strategic Laboratory                                   | Claudio Tavares Sacchi, Claudia Regina Gonçalves, Erica Valessa Ramos Gomes, Karoline Rodrigues Campos                                                                                                                                                                                                                                                                                                                                                                      |
| EPI_ISL_792104, EPI_ISL_792106, EPI_ISL_792107, EPI_ISL_792108, EPI_ISL_792109, EPI_ISL_792110, EPI_ISL_792111, EPI_ISL_792112, EPI_ISL_792113, EPI_ISL_792114                                                                                                                                                                                                                                                 | Instituto Adolfo Lutz - Central                                                                                                                                                                 | Instituto Adolfo Lutz, Interdisciplinary Procedures Center, Strategic Laboratory                                   | Claudio Tavares Sacchi, Claudia Regina Gonçalves, Erica Valessa Ramos Gomes, Karoline Rodrigues Campos                                                                                                                                                                                                                                                                                                                                                                      |
| EPI_ISL_792115, EPI_ISL_792116                                                                                                                                                                                                                                                                                                                                                                                 | Instituto Adolfo Lutz - Regional de Taubate                                                                                                                                                     | Instituto Adolfo Lutz, Interdisciplinary Procedures Center, Strategic Laboratory                                   | Claudio Tavares Sacchi, Claudia Regina Gonçalves, Erica Valessa Ramos Gomes, Karoline Rodrigues Campos                                                                                                                                                                                                                                                                                                                                                                      |
| EPI_ISL_792605, EPI_ISL_792631, EPI_ISL_792633                                                                                                                                                                                                                                                                                                                                                                 | LACEN-PB                                                                                                                                                                                        | Laboratory of Respiratory Viruses and Measles, Oswaldo Cruz Institute, FIOCRUZ                                     | Paola Resende, Luciana Appolinario, Fernando Motta, Anna Carolina Paixao, Ana Carolina Mendonca, João Felipe Bezerra, Romero Henrique Teixeira de Vasconcelos, Dalane Lodal Florentino Teixeira, Thiago Franco de Oliveira Carneiro, Marilda Siqueira                                                                                                                                                                                                                       |
| EPI_ISL_792643                                                                                                                                                                                                                                                                                                                                                                                                 | LACEN-AL                                                                                                                                                                                        | Laboratory of Respiratory Viruses and Measles, Oswaldo Cruz Institute, FIOCRUZ                                     | Paola Resende, Luciana Appolinario, Fernando Motta, Anna Carolina Paixao, Ana Carolina Mendonca, Anderson Brandao Leite, Marilda Siqueira                                                                                                                                                                                                                                                                                                                                   |
| EPI_ISL_792647, EPI_ISL_792649, EPI_ISL_792653                                                                                                                                                                                                                                                                                                                                                                 | LACEN-PR                                                                                                                                                                                        | Laboratory of Respiratory Viruses and Measles, Oswaldo Cruz Institute, FIOCRUZ                                     | Paola Resende, Luciana Appolinario, Fernando Motta, Anna Carolina Paixao, Ana Carolina Mendonca, Maria do Carmo Debur, Irina Nastassja Riediger, Marilda Siqueira                                                                                                                                                                                                                                                                                                           |
| EPI_ISL_792680, EPI_ISL_792681, EPI_ISL_792682, EPI_ISL_792683                                                                                                                                                                                                                                                                                                                                                 | Pathogen Genomics Center, National Institute of Infectious Diseases                                                                                                                             | Pathogen Genomics Center, National Institute of Infectious Diseases                                                | Tsuyoshi Sekizuka, Kentaro Itokawa, Rina Tanaka, Masanori Hashino, Makoto Kuroda                                                                                                                                                                                                                                                                                                                                                                                            |
| EPI_ISL_798972                                                                                                                                                                                                                                                                                                                                                                                                 | Lighthouse Lab in Milton Keynes                                                                                                                                                                 | Wellcome Sanger Institute for the COVID-19 Genomics UK (COG-UK) Consortium                                         | The Lighthouse Lab in Milton Keynes and Alex Alderton, Roberto Amato, Sonia Goncalves, Ewan Harrison, David K. Jackson, Ian Johnston, Dominic Kwiatkowski, Cordelia Langford, John Sillitoe on behalf of the Wellcome Sanger Institute COVID-19 Surveillance Team                                                                                                                                                                                                           |
| EPI_ISL_800134                                                                                                                                                                                                                                                                                                                                                                                                 | Lighthouse Lab in Alderley Park                                                                                                                                                                 | Wellcome Sanger Institute for the COVID-19 Genomics UK (COG-UK) Consortium                                         | Jacquelyn Wynn, Mairead Hyland, The Lighthouse Lab in Alderley Park and Alex Alderton, Roberto Amato, Sonia Goncalves, Ewan Harrison, David K. Jackson, Ian Johnston, Dominic Kwiatkowski, Cordelia Langford, John Sillitoe on behalf of the Wellcome Sanger Institute COVID-19 Surveillance Team                                                                                                                                                                           |
| EPI_ISL_801386, EPI_ISL_801387, EPI_ISL_801388, EPI_ISL_801389, EPI_ISL_801390, EPI_ISL_801391, EPI_ISL_801392, EPI_ISL_801393, EPI_ISL_801394, EPI_ISL_801395, EPI_ISL_801396                                                                                                                                                                                                                                 |                                                                                                                                                                                                 |                                                                                                                    |                                                                                                                                                                                                                                                                                                                                                                                                                                                                             |
| see above                                                                                                                                                                                                                                                                                                                                                                                                      | Laboratório de Ecologia de Doenças Transmissíveis na Amazonia, Instituto Leonidas e Maria Deane - Fiocruz Amazonia                                                                              | Laboratório de Ecologia de Doenças Transmissíveis na Amazonia, Instituto Leonidas e Maria Deane - Fiocruz Amazonia | Valdinete Nascimento, Victor Souza, André Corado, Fernanda Nascimento, George Silva, Ágatha Costa, Debora Duarte, Luciana Gonçalves, Maria Júlia Brandão, Michele Jesus, Felipe Naveca                                                                                                                                                                                                                                                                                      |
| EPI_ISL_801397, EPI_ISL_801398, EPI_ISL_801399, EPI_ISL_801400, EPI_ISL_801401, EPI_ISL_801402,                                                                                                                                                                                                                                                                                                                | Laboratório Central de Saúde Pública do Amazonas - LACEN-AM                                                                                                                                     | Laboratório de Ecologia de Doenças Transmissíveis na Amazonia, Instituto Leonidas e Maria Deane - Fiocruz Amazonia | Valdinete Nascimento, Victor Souza, André Corado, Fernanda Nascimento, George Silva, Ágatha Costa, Debora Duarte, Luciana Gonçalves, Maria Júlia Brandão, Michele Jesus, Felipe Naveca                                                                                                                                                                                                                                                                                      |

|                                                                                                                                                                                                                                                                                                |                                                                                                                                        |                                                                                                                                        |                                                                                                                                                                                                                                                                                                                                                                                                                                                                                                                                                                                                                                                                                                                                                                                                 |
|------------------------------------------------------------------------------------------------------------------------------------------------------------------------------------------------------------------------------------------------------------------------------------------------|----------------------------------------------------------------------------------------------------------------------------------------|----------------------------------------------------------------------------------------------------------------------------------------|-------------------------------------------------------------------------------------------------------------------------------------------------------------------------------------------------------------------------------------------------------------------------------------------------------------------------------------------------------------------------------------------------------------------------------------------------------------------------------------------------------------------------------------------------------------------------------------------------------------------------------------------------------------------------------------------------------------------------------------------------------------------------------------------------|
| EPI_ISL_801403                                                                                                                                                                                                                                                                                 |                                                                                                                                        |                                                                                                                                        |                                                                                                                                                                                                                                                                                                                                                                                                                                                                                                                                                                                                                                                                                                                                                                                                 |
| EPI_ISL_802105, EPI_ISL_802106                                                                                                                                                                                                                                                                 | MSHS Clinical Microbiology Laboratories                                                                                                | MSHS Pathogen Surveillance Program                                                                                                     | Ana S. Gonzalez-Reiche, Hala Alshammry, Mitchell J. Sullivan, Brianne Ciferri, Ajay Obla, Angela Amoako, Mahmoud Awawda, Elena Hirsch, Ashley S. Salimbanon, Levy Sominsky, Katherine Beach, Kayla Russo, Charles Gleason, Sheldie Fabro, Giulio Kleiner, Zenab Khan, Bremy Alburquerque, Adriana van de Guchte, Komal Srivastava, Matthew M. Hernandez, Jayeeta Dutta, Denise Jurczynski, Emily Ferreri, Rachel Chernet, Nancy Francoeur, Betsaida Salom Melo, Irina Oussenko, Gintaras Deikus, Juan Soto, Shwetha Hara Sridhar, Ying-Chih Wang, Kathryn Twyman, Andrew Kasarskis, Deena R. Altman, Robert Sebra, Adolfo Garcia-Sastre, Marta Luksza, Gopi Patel, Sarah Schaefer, Melissa Gitman, Michael D. Nowak, Alberto Paniz-Mondolfi, Emilia Mia Sordillo, Viviana Simon, Harm van Bakel |
| EPI_ISL_804814, EPI_ISL_804815, EPI_ISL_804817, EPI_ISL_804818, EPI_ISL_804819, EPI_ISL_804820, EPI_ISL_804821, EPI_ISL_804823, EPI_ISL_804824, EPI_ISL_804825, EPI_ISL_804826, EPI_ISL_804830, EPI_ISL_804832, EPI_ISL_804833, EPI_ISL_804834, EPI_ISL_804835, EPI_ISL_804841, EPI_ISL_804843 | see above                                                                                                                              | DB Diagnosticos do Brasil                                                                                                              | Laboratório de Parasitologia Médica - Instituto de Medicina Tropical - Universidade de São Paulo                                                                                                                                                                                                                                                                                                                                                                                                                                                                                                                                                                                                                                                                                                |
| EPI_ISL_811149                                                                                                                                                                                                                                                                                 | Laboratório de Ecologia de Doenças Transmissíveis na Amazonia, Instituto Leonidas e Maria Deane - Fiocruz Amazonia                     | Laboratório de Ecologia de Doenças Transmissíveis na Amazonia, Instituto Leonidas e Maria Deane - Fiocruz Amazonia                     | Valdinete Nascimento, Victor Souza, André Corado, Fernanda Nascimento, George Silva, Ágatha Costa, Debora Duarte, Luciana Gonçalves, Matilde Mejía, Karina Pessoa, Maria Júlia Brandão, Michele Jesus, Felipe Naveca                                                                                                                                                                                                                                                                                                                                                                                                                                                                                                                                                                            |
| EPI_ISL_814449                                                                                                                                                                                                                                                                                 | West of Scotland Specialist Virology Centre, NHSGGC / MRC-University of Glasgow Centre for Virus Research                              | COVID-19 Genomics UK (COG-UK) Consortium                                                                                               | Ana da Silva Filipe, Natasha Johnson, Kathy Smollett, Daniel Mair, Stephen Carmichael, Alice Broos, Lily Tong, Jenna Nichols, Kyriaki Nomikou; Sarah McDonald; Richard Orton, Joseph Hughes, Sreenu Vattipally, David L Robertson; Alasdair MacLean, Rory Gunson; Sharif Shaaban, Matthew Holden; Rachel Blacow, Guy Mollett, Kathy Li, James Shepherd, Antonia Ho, Emma Thomson                                                                                                                                                                                                                                                                                                                                                                                                                |
| EPI_ISL_814467                                                                                                                                                                                                                                                                                 | Oxford Viroomics, NDM, University of Oxford; Oxford University Hospitals; Basingstoke and North Hampshire Hospital                     | COVID-19 Genomics UK (COG-UK) Consortium                                                                                               | Tanya Golubchik, David Bonsall, George Macintyre, Amy Trebes, Mariateresa de Cesare, Catrin Moore, Alex Mobbs, Anita Justice, Robert Shaw, Monique Andersson, Timothy Peto, Emma Wise, Nathan Moore, Jessica Lynch, Nick Cortes, Matilde Mori, Stephen Kidd, David Buck, John Todd, Christophe Fraser                                                                                                                                                                                                                                                                                                                                                                                                                                                                                           |
| EPI_ISL_814480, EPI_ISL_814481                                                                                                                                                                                                                                                                 | Wales Specialist Virology Centre Sequencing lab: Pathogen Genomics Unit                                                                | COVID-19 Genomics UK (COG-UK) Consortium                                                                                               | Catherine Moore, Johnathan Evans, Laura Gifford, Malorie Perry, Simon Cottrell, Angela Marchbank, Alec Birchley, Alexander Adams, Amy Gaskin, Bree Gatica-Wilcox, Jason Coombes, Joel Southgate, Lauren Gilbert, Lee Graham, Nicole Pacchiarini, Sara Kumziene-Summerhayes, Sarah Taylor, Sophie Jones, Sara Rey, Matthew Bull, Joanne Watkins, Sally Corden, Tom Connor                                                                                                                                                                                                                                                                                                                                                                                                                        |
| EPI_ISL_814619                                                                                                                                                                                                                                                                                 | Bioinformatics and Biostatistics Lab, Advanced Sequencing Facility                                                                     | COVID-19 Genomics UK (COG-UK) Consortium                                                                                               | Aengus Stewart,Jerome Nicod,Chelsea Sawyer,Laura Cubitt,Harshil Patel,Margaret Crawford                                                                                                                                                                                                                                                                                                                                                                                                                                                                                                                                                                                                                                                                                                         |
| EPI_ISL_822345, EPI_ISL_822810, EPI_ISL_822829, EPI_ISL_823092                                                                                                                                                                                                                                 | Wales Specialist Virology Centre Sequencing lab: Pathogen Genomics Unit                                                                | COVID-19 Genomics UK (COG-UK) Consortium                                                                                               | Catherine Moore, Johnathan Evans, Laura Gifford, Malorie Perry, Simon Cottrell, Angela Marchbank, Alec Birchley, Alexander Adams, Amy Gaskin, Bree Gatica-Wilcox, Jason Coombes, Joel Southgate, Lauren Gilbert, Lee Graham, Nicole Pacchiarini, Sara Kumziene-Summerhayes, Sarah Taylor, Sophie Jones, Sara Rey, Matthew Bull, Joanne Watkins, Sally Corden, Tom Connor                                                                                                                                                                                                                                                                                                                                                                                                                        |
| EPI_ISL_831645, EPI_ISL_831660, EPI_ISL_831688, EPI_ISL_831689, EPI_ISL_831938, EPI_ISL_832009, EPI_ISL_832011                                                                                                                                                                                 | Laboratório de Microbiologia Molecular - Universidade FEEVALE                                                                          | Universidade Federal de Ciências da Saúde de Porto Alegre                                                                              | Vinicius Bonetti Franceschi, Amanda de Menezes Mayer, Gabriel Dickin Caldana, Carla Andretta Moreira Neves, Patricia Aline Gröhs Ferrareze, Gabriela Bettella Cybis, Ricardo Ariel Zimmerman, Livia Kmetzsch, Fernando Rosado Spilki, Claudia Elizabeth Thomson                                                                                                                                                                                                                                                                                                                                                                                                                                                                                                                                 |
| EPI_ISL_833131, EPI_ISL_833132, EPI_ISL_833133, EPI_ISL_833134, EPI_ISL_833136, EPI_ISL_833137, EPI_ISL_833138, EPI_ISL_833139, EPI_ISL_833140                                                                                                                                                 | Laboratório de Ecologia de Doenças Transmissíveis na Amazonia, Instituto Leonidas e Maria Deane - Fiocruz Amazonia                     | Laboratório de Ecologia de Doenças Transmissíveis na Amazonia, Instituto Leonidas e Maria Deane - Fiocruz Amazonia                     | Valdinete Nascimento, Victor Souza, André Corado, Fernanda Nascimento, George Silva, Ágatha Costa, Debora Duarte, Karina Pessoa, Matilde Mejía, Luciana Gonçalves, Maria Júlia Brandão, Michele Jesus, Felipe Naveca                                                                                                                                                                                                                                                                                                                                                                                                                                                                                                                                                                            |
| EPI_ISL_833152, EPI_ISL_833153, EPI_ISL_833154                                                                                                                                                                                                                                                 | Instituto Adolfo Lutz - Central                                                                                                        | Instituto Adolfo Lutz, Interdisciplinary Procedures Center, Strategic Laboratory                                                       | Claudio Tavares Sacchi, Claudia Regina Gonçalves, Erica Valessa Ramos Gomes, Karoline Rodrigues Campos                                                                                                                                                                                                                                                                                                                                                                                                                                                                                                                                                                                                                                                                                          |
| EPI_ISL_833156                                                                                                                                                                                                                                                                                 | Instituto Adolfo Lutz - Regional de Sorocaba                                                                                           | Instituto Adolfo Lutz, Interdisciplinary Procedures Center, Strategic Laboratory                                                       | Claudio Tavares Sacchi, Claudia Regina Gonçalves, Erica Valessa Ramos Gomes, Karoline Rodrigues Campos                                                                                                                                                                                                                                                                                                                                                                                                                                                                                                                                                                                                                                                                                          |
| EPI_ISL_833160                                                                                                                                                                                                                                                                                 | Instituto Adolfo Lutz - Regional de Santo Andre                                                                                        | Instituto Adolfo Lutz, Interdisciplinary Procedures Center, Strategic Laboratory                                                       | Claudio Tavares Sacchi, Claudia Regina Gonçalves, Erica Valessa Ramos Gomes, Karoline Rodrigues Campos                                                                                                                                                                                                                                                                                                                                                                                                                                                                                                                                                                                                                                                                                          |
| EPI_ISL_833162                                                                                                                                                                                                                                                                                 | Lab LOC - Itapeperica da Serra                                                                                                         | Instituto Adolfo Lutz, Interdisciplinary Procedures Center, Strategic Laboratory                                                       | Claudio Tavares Sacchi, Claudia Regina Gonçalves, Erica Valessa Ramos Gomes, Karoline Rodrigues Campos                                                                                                                                                                                                                                                                                                                                                                                                                                                                                                                                                                                                                                                                                          |
| EPI_ISL_833165                                                                                                                                                                                                                                                                                 | Hospital Samaritano                                                                                                                    | Instituto Adolfo Lutz, Interdisciplinary Procedures Center, Strategic Laboratory                                                       | Claudio Tavares Sacchi, Claudia Regina Gonçalves, Erica Valessa Ramos Gomes, Karoline Rodrigues Campos                                                                                                                                                                                                                                                                                                                                                                                                                                                                                                                                                                                                                                                                                          |
| EPI_ISL_833167, EPI_ISL_833168, EPI_ISL_833169, EPI_ISL_833170, EPI_ISL_833171, EPI_ISL_833172, EPI_ISL_833173, EPI_ISL_833174                                                                                                                                                                 | DB Diagnosticos do Brasil                                                                                                              | Instituto Adolfo Lutz, Interdisciplinary Procedures Center, Strategic Laboratory                                                       | Claudio Tavares Sacchi, Claudia Regina Gonçalves, Erica Valessa Ramos Gomes, Karoline Rodrigues Campos                                                                                                                                                                                                                                                                                                                                                                                                                                                                                                                                                                                                                                                                                          |
| EPI_ISL_833249                                                                                                                                                                                                                                                                                 | Division of Emerging Infectious Diseases, Bureau of Infectious Diseases Diagnosis Control, Korea Disease Control and Prevention Agency | Division of Emerging Infectious Diseases, Bureau of Infectious Diseases Diagnosis Control, Korea Disease Control and Prevention Agency | Ae Kyung Park, Il-Hwan Kim, Heui Man Kim, Jeong-Min Kim, Namjoo Lee, Chaeyoung Lee, Sang Hee Woo, Eun-Jin Kim                                                                                                                                                                                                                                                                                                                                                                                                                                                                                                                                                                                                                                                                                   |
| EPI_ISL_834755                                                                                                                                                                                                                                                                                 | Lighthouse Lab in Glasgow                                                                                                              | Wellcome Sanger Institute for the COVID-19 Genomics UK (COG-UK) Consortium                                                             | Harper VanSteenhouse, Yumi Kasai, David Gray, Carol Clugston, Anna Dominiczak and Alex Alderton, Roberto Amato, Sonia Goncalves, Ewan Harrison, David K. Jackson, Ian Johnston, Dominic Kwiatkowski, Cordelia Langford, John Sillitoe on behalf of the Wellcome Sanger Institute COVID-19 Surveillance Team                                                                                                                                                                                                                                                                                                                                                                                                                                                                                     |
| EPI_ISL_836978                                                                                                                                                                                                                                                                                 | Irmandade da Santa Casa de Misericórdia de Lorena                                                                                      | Instituto Adolfo Lutz, Interdisciplinary Procedures Center, Strategic Laboratory                                                       | Claudio Tavares Sacchi, Claudia Regina Gonçalves, Erica Valessa Ramos Gomes, Karoline Rodrigues Campos                                                                                                                                                                                                                                                                                                                                                                                                                                                                                                                                                                                                                                                                                          |
| EPI_ISL_838072, EPI_ISL_838085, EPI_ISL_838086                                                                                                                                                                                                                                                 | West of Scotland Specialist Virology Centre, NHSGGC / MRC-University of Glasgow Centre for Virus Research                              | COVID-19 Genomics UK (COG-UK) Consortium                                                                                               | Ana da Silva Filipe, Natasha Johnson, Kathy Smollett, Daniel Mair, Stephen Carmichael, Alice Broos, Lily Tong, Jenna Nichols, Kyriaki Nomikou; Sarah McDonald; Richard Orton, Joseph Hughes, Sreenu Vattipally, David L Robertson; Alasdair MacLean, Rory Gunson; Sharif Shaaban, Matthew Holden; Rachel Blacow, Guy Mollett, Kathy Li, James Shepherd, Antonia Ho, Emma Thomson                                                                                                                                                                                                                                                                                                                                                                                                                |
| EPI_ISL_838714                                                                                                                                                                                                                                                                                 | University College London, Great Ormond Street Hospital for Children NHS Foundation Trust, Imperial College Healthcare NHS Trust       | COVID-19 Genomics UK (COG-UK) Consortium                                                                                               | Sergi Castellano, Rachel Williams, Mark Kristiansen, Paola Resende Silva, Sunando Roy, Tony Brooks, Helena Tutill, Paola Niola, Patricia Dyal, Charlotte Williams, Leysa Forrest, Yasmin Panchbhaya, Jacqueline Findlay, Samuel Weeks, Julianne Brown, Kathryn Harris, Paul Randell, James Price, Alison Holmes, Judith Breuer                                                                                                                                                                                                                                                                                                                                                                                                                                                                  |
| EPI_ISL_840422, EPI_ISL_840559                                                                                                                                                                                                                                                                 | Originating lab: Wales Specialist Virology Centre Sequencing lab: Pathogen Genomics Unit                                               | Public Health Wales Microbiology Cardiff Wales Specialist Virology Centre                                                              | Catherine Moore, Johnathan Evans, Laura Gifford, Malorie Perry, Simon Cottrell, Angela Marchbank, Alec Birchley, Alexander Adams, Amy Gaskin, Bree Gatica-Wilcox, Jason Coombes, Joel Southgate, Lauren Gilbert, Lee Graham, Nicole Pacchiarini, Sara Kumziene-Summerhayes, Sarah Taylor, Sophie Jones, Sara Rey, Matthew Bull, Joanne Watkins, Sally Corden, Tom Connor                                                                                                                                                                                                                                                                                                                                                                                                                        |
| EPI_ISL_840880, EPI_ISL_841096, EPI_ISL_841220                                                                                                                                                                                                                                                 | Wales Specialist Virology Centre Sequencing lab: Pathogen Genomics Unit                                                                | Public Health Wales Microbiology Cardiff Wales Specialist Virology Centre                                                              | Catherine Moore, Johnathan Evans, Laura Gifford, Malorie Perry, Simon Cottrell, Angela Marchbank, Alec Birchley, Alexander Adams, Amy Gaskin, Bree Gatica-Wilcox, Jason Coombes, Joel Southgate, Lauren Gilbert, Lee Graham, Nicole Pacchiarini, Sara Kumziene-Summerhayes, Sarah Taylor, Sophie Jones, Sara Rey, Matthew Bull, Joanne Watkins, Sally Corden, Tom Connor                                                                                                                                                                                                                                                                                                                                                                                                                        |
| EPI_ISL_841587                                                                                                                                                                                                                                                                                 | Originating lab: Wales Specialist Virology Centre Sequencing lab: Pathogen Genomics Unit                                               | Public Health Wales Microbiology Cardiff Wales Specialist Virology Centre                                                              | Catherine Moore, Johnathan Evans, Laura Gifford, Malorie Perry, Simon Cottrell, Angela Marchbank, Alec Birchley, Alexander Adams, Amy Gaskin, Bree Gatica-Wilcox, Jason Coombes, Joel Southgate, Lauren Gilbert, Lee Graham, Nicole Pacchiarini, Sara Kumziene-Summerhayes, Sarah Taylor, Sophie Jones, Sara Rey, Matthew Bull, Joanne Watkins, Sally Corden, Tom Connor                                                                                                                                                                                                                                                                                                                                                                                                                        |

|                                                                                                                                                                                                                                                                                                                                                                                                                                |                                                                                                                                        |                                                                                                                                        |                                                                                                                                                                                                                                                                                                             |
|--------------------------------------------------------------------------------------------------------------------------------------------------------------------------------------------------------------------------------------------------------------------------------------------------------------------------------------------------------------------------------------------------------------------------------|----------------------------------------------------------------------------------------------------------------------------------------|----------------------------------------------------------------------------------------------------------------------------------------|-------------------------------------------------------------------------------------------------------------------------------------------------------------------------------------------------------------------------------------------------------------------------------------------------------------|
| EPI_ISL_843044                                                                                                                                                                                                                                                                                                                                                                                                                 | Barts Health NHS Trust                                                                                                                 | COVID-19 Genomics UK (COG-UK) Consortium                                                                                               | CUTINO-MOGUEL, Maria-Teresa; HARRINGTON, David; OWOYEMI, Dola; SHYLINI, Raghavendran; BROAD, Claire; KELE, Beatrix                                                                                                                                                                                          |
| EPI_ISL_843151, EPI_ISL_843152, EPI_ISL_843159, EPI_ISL_843161                                                                                                                                                                                                                                                                                                                                                                 | Regional Virus Laboratory, Belfast Health and Social Care Trust                                                                        | COVID-19 Genomics UK (COG-UK) Consortium                                                                                               | Conail McCaughey, James McKenna, Tanya Curran, Susan Feeney, Alison Watt, Ciara Cox, Mairead Connor, Zoltan Molnar, David Simpson, Derek Fairley                                                                                                                                                            |
| EPI_ISL_848562, EPI_ISL_848563, EPI_ISL_848565, EPI_ISL_848566, EPI_ISL_848571, EPI_ISL_848582, EPI_ISL_848583, EPI_ISL_848585, EPI_ISL_848587, EPI_ISL_848588, EPI_ISL_848589, EPI_ISL_848590, EPI_ISL_848592, EPI_ISL_848593, EPI_ISL_848595, EPI_ISL_848611, EPI_ISL_848615, EPI_ISL_848617, EPI_ISL_848618, EPI_ISL_848619, EPI_ISL_848620, EPI_ISL_848621, EPI_ISL_848622, EPI_ISL_848623, EPI_ISL_848624, EPI_ISL_848628 | see above                                                                                                                              | Evandro Chagas Institute                                                                                                               | Santos, M.C.; Silva, A.M.; Junior, W.D.C.; Barbagelata, L.S.; Ferreira, J.A.; Sousa, E.M.A.; da Silva, P.S.; Pinheiro, K.C.; L.C.; Sousa Junior, E.C.                                                                                                                                                       |
| EPI_ISL_849680                                                                                                                                                                                                                                                                                                                                                                                                                 | Public Health Virology Laboratory, Forensic and Scientific Services (PHV-FSS)                                                          | Public Health Virology Laboratory, Forensic and Scientific Services (PHV-FSS)                                                          | Son Nguyen et al                                                                                                                                                                                                                                                                                            |
| EPI_ISL_850198                                                                                                                                                                                                                                                                                                                                                                                                                 | Division of Emerging Infectious Diseases, Bureau of Infectious Diseases Diagnosis Control, Korea Disease Control and Prevention Agency | Division of Emerging Infectious Diseases, Bureau of Infectious Diseases Diagnosis Control, Korea Disease Control and Prevention Agency | Ae Kyung Park, Il-Hwan Kim, Heui Man Kim, Jeong-Min Kim, Namjoon Lee, Chaeyoung Lee, Sang Hee Woo, Eun-Jin Kim                                                                                                                                                                                              |
| EPI_ISL_854594                                                                                                                                                                                                                                                                                                                                                                                                                 | Faroese National Reference Laboratory for Fish and Animal Diseases                                                                     | Faroese National Reference Laboratory for Fish and Animal Diseases                                                                     | Maria Marjunardóttir Dahl, Petra Elisabeth Petersen, Arnfinnur Kallsberg Junior, Debes Hammershaimb Christiansen                                                                                                                                                                                            |
| EPI_ISL_854921                                                                                                                                                                                                                                                                                                                                                                                                                 | Quest Diagnostics                                                                                                                      | Quest Diagnostics                                                                                                                      | Rosenthal,S.H., Gerasimova,A., Kagan,R.M., Anderson, B., Hua, M., Liu Y., Bernstein, L.E., Livingston, K.E., Perez, A., Shalhout, D.F., Shlykhter, I.A., Owen, R., Tanpaiboon, P., Lacbawan, F.                                                                                                             |
| EPI_ISL_857239                                                                                                                                                                                                                                                                                                                                                                                                                 | DOHMH Corona                                                                                                                           | New York City Public Health Laboratory                                                                                                 | Jade Wang, et al.                                                                                                                                                                                                                                                                                           |
| EPI_ISL_857679                                                                                                                                                                                                                                                                                                                                                                                                                 | Lighthouse Lab in Cambridge                                                                                                            | Wellcome Sanger Institute for the COVID-19 Genomics UK (COG-UK) Consortium                                                             | Rob Howes, The Lighthouse Lab in Cambridge and Alex Alderton, Roberto Amato, Sonia Goncalves, Ewan Harrison, David K. Jackson, Ian Johnston, Dominic Kwiatkowski, Cordelia Langford, John Sillitoe on behalf of the Wellcome Sanger Institute COVID-19 Surveillance Team                                    |
| EPI_ISL_858060                                                                                                                                                                                                                                                                                                                                                                                                                 | Lighthouse Lab in Glasgow                                                                                                              | Wellcome Sanger Institute for the COVID-19 Genomics UK (COG-UK) Consortium                                                             | Harper VanSteenhouse, Yumi Kasai, David Gray, Carol Clugston, Anna Dominiczak and Alex Alderton, Roberto Amato, Sonia Goncalves, Ewan Harrison, David K. Jackson, Ian Johnston, Dominic Kwiatkowski, Cordelia Langford, John Sillitoe on behalf of the Wellcome Sanger Institute COVID-19 Surveillance Team |
| EPI_ISL_858221                                                                                                                                                                                                                                                                                                                                                                                                                 | Lighthouse Lab in Alderley Park                                                                                                        | Wellcome Sanger Institute for the COVID-19 Genomics UK (COG-UK) Consortium                                                             | Jacquelyn Wynn, Mairead Hyland, The Lighthouse Lab in Alderley Park and Alex Alderton, Roberto Amato, Sonia Goncalves, Ewan Harrison, David K. Jackson, Ian Johnston, Dominic Kwiatkowski, Cordelia Langford, John Sillitoe on behalf of the Wellcome Sanger Institute COVID-19 Surveillance Team           |
| EPI_ISL_858320, EPI_ISL_858323                                                                                                                                                                                                                                                                                                                                                                                                 | Lighthouse Lab in Glasgow                                                                                                              | Wellcome Sanger Institute for the COVID-19 Genomics UK (COG-UK) Consortium                                                             | Harper VanSteenhouse, Yumi Kasai, David Gray, Carol Clugston, Anna Dominiczak and Alex Alderton, Roberto Amato, Sonia Goncalves, Ewan Harrison, David K. Jackson, Ian Johnston, Dominic Kwiatkowski, Cordelia Langford, John Sillitoe on behalf of the Wellcome Sanger Institute COVID-19 Surveillance Team |
| EPI_ISL_858397, EPI_ISL_858413                                                                                                                                                                                                                                                                                                                                                                                                 | Lighthouse Lab in Alderley Park                                                                                                        | Wellcome Sanger Institute for the COVID-19 Genomics UK (COG-UK) Consortium                                                             | Jacquelyn Wynn, Mairead Hyland, The Lighthouse Lab in Alderley Park and Alex Alderton, Roberto Amato, Sonia Goncalves, Ewan Harrison, David K. Jackson, Ian Johnston, Dominic Kwiatkowski, Cordelia Langford, John Sillitoe on behalf of the Wellcome Sanger Institute COVID-19 Surveillance Team           |
| EPI_ISL_858446, EPI_ISL_858447                                                                                                                                                                                                                                                                                                                                                                                                 | Lighthouse Lab in Glasgow                                                                                                              | Wellcome Sanger Institute for the COVID-19 Genomics UK (COG-UK) Consortium                                                             | Harper VanSteenhouse, Yumi Kasai, David Gray, Carol Clugston, Anna Dominiczak and Alex Alderton, Roberto Amato, Sonia Goncalves, Ewan Harrison, David K. Jackson, Ian Johnston, Dominic Kwiatkowski, Cordelia Langford, John Sillitoe on behalf of the Wellcome Sanger Institute COVID-19 Surveillance Team |
| EPI_ISL_858563, EPI_ISL_858697, EPI_ISL_858825                                                                                                                                                                                                                                                                                                                                                                                 | Lighthouse Lab in Alderley Park                                                                                                        | Wellcome Sanger Institute for the COVID-19 Genomics UK (COG-UK) Consortium                                                             | Jacquelyn Wynn, Mairead Hyland, The Lighthouse Lab in Alderley Park and Alex Alderton, Roberto Amato, Sonia Goncalves, Ewan Harrison, David K. Jackson, Ian Johnston, Dominic Kwiatkowski, Cordelia Langford, John Sillitoe on behalf of the Wellcome Sanger Institute COVID-19 Surveillance Team           |
| EPI_ISL_859033, EPI_ISL_859119, EPI_ISL_859170, EPI_ISL_859176                                                                                                                                                                                                                                                                                                                                                                 | Lighthouse Lab in Glasgow                                                                                                              | Wellcome Sanger Institute for the COVID-19 Genomics UK (COG-UK) Consortium                                                             | Harper VanSteenhouse, Yumi Kasai, David Gray, Carol Clugston, Anna Dominiczak and Alex Alderton, Roberto Amato, Sonia Goncalves, Ewan Harrison, David K. Jackson, Ian Johnston, Dominic Kwiatkowski, Cordelia Langford, John Sillitoe on behalf of the Wellcome Sanger Institute COVID-19 Surveillance Team |
| EPI_ISL_859441                                                                                                                                                                                                                                                                                                                                                                                                                 | Lighthouse Lab in Alderley Park                                                                                                        | Wellcome Sanger Institute for the COVID-19 Genomics UK (COG-UK) Consortium                                                             | Jacquelyn Wynn, Mairead Hyland, The Lighthouse Lab in Alderley Park and Alex Alderton, Roberto Amato, Sonia Goncalves, Ewan Harrison, David K. Jackson, Ian Johnston, Dominic Kwiatkowski, Cordelia Langford, John Sillitoe on behalf of the Wellcome Sanger Institute COVID-19 Surveillance Team           |
| EPI_ISL_860285, EPI_ISL_860287                                                                                                                                                                                                                                                                                                                                                                                                 | Department of Medical Microbiology, St. Olavs hospital                                                                                 | Norwegian Institute of Public Health, Department of Virology                                                                           | Kathrine Stene-Johansen, Kamilla Heddeland Instefjord, Hilde Elshaug, Atiya R Ali,Marie Paulsen Madsen, Rasmus Riis Kopperud, Hilde Vollan, Karoline Bragstad, Olav Hungnes                                                                                                                                 |
| EPI_ISL_861242                                                                                                                                                                                                                                                                                                                                                                                                                 | Instituto de Biotecnologia - UNESP-Botucatu-SP                                                                                         | Instituto de Biotecnologia - UNESP-Botucatu-SP                                                                                         | Leila Sabrina Ullmann; Fábio Sossai Possebon, Camila Dantas Malossi, Paula Rahal, Paulo Inacio da Costa, João Pessoa Araújo Jr.                                                                                                                                                                             |
| EPI_ISL_861625, EPI_ISL_861626, EPI_ISL_861627                                                                                                                                                                                                                                                                                                                                                                                 | Instituto Adolfo Lutz - Central                                                                                                        | Instituto Adolfo Lutz, Interdisciplinary Procedures Center, Strategic Laboratory                                                       | Claudio Tavares Sacchi, Claudia Regina Gonçalves, Erica Valessa Ramos Gomes, Karoline Rodrigues Campos                                                                                                                                                                                                      |
| EPI_ISL_861628                                                                                                                                                                                                                                                                                                                                                                                                                 | Laboratorio Municipal de Guarulhos                                                                                                     | Instituto Adolfo Lutz, Interdisciplinary Procedures Center, Strategic Laboratory                                                       | Claudio Tavares Sacchi, Claudia Regina Gonçalves, Erica Valessa Ramos Gomes, Karoline Rodrigues Campos                                                                                                                                                                                                      |
| EPI_ISL_861630, EPI_ISL_861631, EPI_ISL_861632, EPI_ISL_861633, EPI_ISL_861634                                                                                                                                                                                                                                                                                                                                                 | Instituto Adolfo Lutz - Central                                                                                                        | Instituto Adolfo Lutz, Interdisciplinary Procedures Center, Strategic Laboratory                                                       | Claudio Tavares Sacchi, Claudia Regina Gonçalves, Erica Valessa Ramos Gomes, Karoline Rodrigues Campos                                                                                                                                                                                                      |
| EPI_ISL_861636                                                                                                                                                                                                                                                                                                                                                                                                                 | Hospital Geral de Sao Mateus São Paulo                                                                                                 | Instituto Adolfo Lutz, Interdisciplinary Procedures Center, Strategic Laboratory                                                       | Claudio Tavares Sacchi, Claudia Regina Gonçalves, Erica Valessa Ramos Gomes, Karoline Rodrigues Campos                                                                                                                                                                                                      |
| EPI_ISL_861637                                                                                                                                                                                                                                                                                                                                                                                                                 | Hospital Nipo Brasileiro                                                                                                               | Instituto Adolfo Lutz, Interdisciplinary Procedures Center, Strategic Laboratory                                                       | Claudio Tavares Sacchi, Claudia Regina Gonçalves, Erica Valessa Ramos Gomes, Karoline Rodrigues Campos                                                                                                                                                                                                      |
| EPI_ISL_861639                                                                                                                                                                                                                                                                                                                                                                                                                 | Hospital Sao Paulo de Ensino da Unifesp                                                                                                | Instituto Adolfo Lutz, Interdisciplinary Procedures Center, Strategic Laboratory                                                       | Claudio Tavares Sacchi, Claudia Regina Gonçalves, Erica Valessa Ramos Gomes, Karoline Rodrigues Campos                                                                                                                                                                                                      |
| EPI_ISL_861640, EPI_ISL_861641                                                                                                                                                                                                                                                                                                                                                                                                 | Hospital Municipal Dr. Moyses Deutsch                                                                                                  | Instituto Adolfo Lutz, Interdisciplinary Procedures Center, Strategic Laboratory                                                       | Claudio Tavares Sacchi, Claudia Regina Gonçalves, Erica Valessa Ramos Gomes, Karoline Rodrigues Campos                                                                                                                                                                                                      |
| EPI_ISL_861643                                                                                                                                                                                                                                                                                                                                                                                                                 | Instituto Adolfo Lutz - Central                                                                                                        | Instituto Adolfo Lutz, Interdisciplinary Procedures Center, Strategic Laboratory                                                       | Claudio Tavares Sacchi, Claudia Regina Gonçalves, Erica Valessa Ramos Gomes, Karoline Rodrigues Campos                                                                                                                                                                                                      |
| EPI_ISL_861644                                                                                                                                                                                                                                                                                                                                                                                                                 | Hospital Santa Virginia                                                                                                                | Instituto Adolfo Lutz, Interdisciplinary Procedures Center, Strategic Laboratory                                                       | Claudio Tavares Sacchi, Claudia Regina Gonçalves, Erica Valessa Ramos Gomes, Karoline Rodrigues Campos                                                                                                                                                                                                      |
| EPI_ISL_861645                                                                                                                                                                                                                                                                                                                                                                                                                 | Hospital e Pronto Socorro Comunitario Vila Iolanda                                                                                     | Instituto Adolfo Lutz, Interdisciplinary Procedures Center, Strategic Laboratory                                                       | Claudio Tavares Sacchi, Claudia Regina Gonçalves, Erica Valessa Ramos Gomes, Karoline Rodrigues Campos                                                                                                                                                                                                      |
| EPI_ISL_861646, EPI_ISL_861647                                                                                                                                                                                                                                                                                                                                                                                                 | Hospital Santa Marcelina Sao Paulo                                                                                                     | Instituto Adolfo Lutz, Interdisciplinary Procedures Center, Strategic Laboratory                                                       | Claudio Tavares Sacchi, Claudia Regina Gonçalves, Erica Valessa Ramos Gomes, Karoline Rodrigues Campos                                                                                                                                                                                                      |
| EPI_ISL_861648                                                                                                                                                                                                                                                                                                                                                                                                                 | Hospital e Pronto Socorro Portinari                                                                                                    | Instituto Adolfo Lutz, Interdisciplinary Procedures Center, Strategic Laboratory                                                       | Claudio Tavares Sacchi, Claudia Regina Gonçalves, Erica Valessa Ramos Gomes, Karoline Rodrigues Campos                                                                                                                                                                                                      |
| EPI_ISL_861649                                                                                                                                                                                                                                                                                                                                                                                                                 | Hospital Renascença Campinas                                                                                                           | Instituto Adolfo Lutz, Interdisciplinary Procedures Center, Strategic Laboratory                                                       | Claudio Tavares Sacchi, Claudia Regina Gonçalves, Erica Valessa Ramos Gomes, Karoline Rodrigues Campos                                                                                                                                                                                                      |
| EPI_ISL_861650                                                                                                                                                                                                                                                                                                                                                                                                                 | Hospital Santa Marcelina Sao Paulo                                                                                                     | Instituto Adolfo Lutz, Interdisciplinary Procedures Center, Strategic Laboratory                                                       | Claudio Tavares Sacchi, Claudia Regina Gonçalves, Erica Valessa Ramos Gomes, Karoline Rodrigues Campos                                                                                                                                                                                                      |
| EPI_ISL_861652                                                                                                                                                                                                                                                                                                                                                                                                                 | AMA Wamberto Dias da Costa                                                                                                             | Instituto Adolfo Lutz, Interdisciplinary Procedures Center,                                                                            | Claudio Tavares Sacchi, Claudia Regina Gonçalves, Erica Valessa Ramos Gomes, Karoline Rodrigues Campos                                                                                                                                                                                                      |

|                                                                                                                                                                                                                                                                                                                |                                                                                                                                                                                                 |                                                                                        |                                                                                                                                                                                                                                                                                                                                                                                                                                                           |
|----------------------------------------------------------------------------------------------------------------------------------------------------------------------------------------------------------------------------------------------------------------------------------------------------------------|-------------------------------------------------------------------------------------------------------------------------------------------------------------------------------------------------|----------------------------------------------------------------------------------------|-----------------------------------------------------------------------------------------------------------------------------------------------------------------------------------------------------------------------------------------------------------------------------------------------------------------------------------------------------------------------------------------------------------------------------------------------------------|
|                                                                                                                                                                                                                                                                                                                |                                                                                                                                                                                                 | Strategic Laboratory                                                                   |                                                                                                                                                                                                                                                                                                                                                                                                                                                           |
| EPI_ISL_861654, EPI_ISL_861655                                                                                                                                                                                                                                                                                 | Hospital Santa Marcelina Sao Paulo                                                                                                                                                              | Instituto Adolfo Lutz, Interdisciplinary Procedures Center, Strategic Laboratory       | Claudio Tavares Sacchi, Claudia Regina Gonçalves, Erica Valessa Ramos Gomes, Karoline Rodrigues Campos                                                                                                                                                                                                                                                                                                                                                    |
| EPI_ISL_861656                                                                                                                                                                                                                                                                                                 | UPA de Jandira                                                                                                                                                                                  | Instituto Adolfo Lutz, Interdisciplinary Procedures Center, Strategic Laboratory       | Claudio Tavares Sacchi, Claudia Regina Gonçalves, Erica Valessa Ramos Gomes, Karoline Rodrigues Campos                                                                                                                                                                                                                                                                                                                                                    |
| EPI_ISL_861657                                                                                                                                                                                                                                                                                                 | Hospital e Maternidade Sino Brasileiro                                                                                                                                                          | Instituto Adolfo Lutz, Interdisciplinary Procedures Center, Strategic Laboratory       | Claudio Tavares Sacchi, Claudia Regina Gonçalves, Erica Valessa Ramos Gomes, Karoline Rodrigues Campos                                                                                                                                                                                                                                                                                                                                                    |
| EPI_ISL_861658                                                                                                                                                                                                                                                                                                 | Hospital Municipal Antônio Giglio                                                                                                                                                               | Instituto Adolfo Lutz, Interdisciplinary Procedures Center, Strategic Laboratory       | Claudio Tavares Sacchi, Claudia Regina Gonçalves, Erica Valessa Ramos Gomes, Karoline Rodrigues Campos                                                                                                                                                                                                                                                                                                                                                    |
| EPI_ISL_861660, EPI_ISL_861661                                                                                                                                                                                                                                                                                 | PS e Maternidade Nair Fonseca Leitao Arantes                                                                                                                                                    | Instituto Adolfo Lutz, Interdisciplinary Procedures Center, Strategic Laboratory       | Claudio Tavares Sacchi, Claudia Regina Gonçalves, Erica Valessa Ramos Gomes, Karoline Rodrigues Campos                                                                                                                                                                                                                                                                                                                                                    |
| EPI_ISL_861663                                                                                                                                                                                                                                                                                                 | Instituto Adolfo Lutz - Central                                                                                                                                                                 | Instituto Adolfo Lutz, Interdisciplinary Procedures Center, Strategic Laboratory       | Claudio Tavares Sacchi, Claudia Regina Gonçalves, Erica Valessa Ramos Gomes, Karoline Rodrigues Campos                                                                                                                                                                                                                                                                                                                                                    |
| EPI_ISL_861665                                                                                                                                                                                                                                                                                                 | Instituto Adolfo Lutz - Regional de Taubate                                                                                                                                                     | Instituto Adolfo Lutz, Interdisciplinary Procedures Center, Strategic Laboratory       | Claudio Tavares Sacchi, Claudia Regina Gonçalves, Erica Valessa Ramos Gomes, Karoline Rodrigues Campos                                                                                                                                                                                                                                                                                                                                                    |
| EPI_ISL_861666                                                                                                                                                                                                                                                                                                 | PSF Dr. Antonio Pires de Almeida                                                                                                                                                                | Instituto Adolfo Lutz, Interdisciplinary Procedures Center, Strategic Laboratory       | Claudio Tavares Sacchi, Claudia Regina Gonçalves, Erica Valessa Ramos Gomes, Karoline Rodrigues Campos                                                                                                                                                                                                                                                                                                                                                    |
| EPI_ISL_861667                                                                                                                                                                                                                                                                                                 | Instituto Adolfo Lutz - Regional de Rio Claro                                                                                                                                                   | Instituto Adolfo Lutz, Interdisciplinary Procedures Center, Strategic Laboratory       | Claudio Tavares Sacchi, Claudia Regina Gonçalves, Erica Valessa Ramos Gomes, Karoline Rodrigues Campos                                                                                                                                                                                                                                                                                                                                                    |
| EPI_ISL_861671                                                                                                                                                                                                                                                                                                 | Hospital Municipal Prefeito Waldemar Costa Filho                                                                                                                                                | Instituto Adolfo Lutz, Interdisciplinary Procedures Center, Strategic Laboratory       | Claudio Tavares Sacchi, Claudia Regina Gonçalves, Erica Valessa Ramos Gomes, Karoline Rodrigues Campos                                                                                                                                                                                                                                                                                                                                                    |
| EPI_ISL_861672                                                                                                                                                                                                                                                                                                 | Day Hospital de Ermelino Matarazzo                                                                                                                                                              | Instituto Adolfo Lutz, Interdisciplinary Procedures Center, Strategic Laboratory       | Claudio Tavares Sacchi, Claudia Regina Gonçalves, Erica Valessa Ramos Gomes, Karoline Rodrigues Campos                                                                                                                                                                                                                                                                                                                                                    |
| EPI_ISL_861681                                                                                                                                                                                                                                                                                                 | Hospital Municipal Dr. Waldemar Tebaldi                                                                                                                                                         | Instituto Adolfo Lutz, Interdisciplinary Procedures Center, Strategic Laboratory       | Claudio Tavares Sacchi, Claudia Regina Gonçalves, Erica Valessa Ramos Gomes, Karoline Rodrigues Campos                                                                                                                                                                                                                                                                                                                                                    |
| EPI_ISL_861867, EPI_ISL_861868, EPI_ISL_861873, EPI_ISL_861875, EPI_ISL_861876, EPI_ISL_861879, EPI_ISL_861881, EPI_ISL_861886, EPI_ISL_861890, EPI_ISL_861894, EPI_ISL_861895, EPI_ISL_861896, EPI_ISL_861900, EPI_ISL_861901, EPI_ISL_861902, EPI_ISL_861905, EPI_ISL_861906, EPI_ISL_861912, EPI_ISL_861913 |                                                                                                                                                                                                 |                                                                                        |                                                                                                                                                                                                                                                                                                                                                                                                                                                           |
| see above                                                                                                                                                                                                                                                                                                      | LATE - Laboratório de Técnicas Especiais - Hospital Israelita Albert Einstein                                                                                                                   | LATE - Laboratório de Técnicas Especiais - Hospital Israelita Albert Einstein          | Deyvid Amgarten, Fernanda de Mello Malta, Raquel Riyuzo, Ana Paula Moreira Salles, Pedro Henrique Sebe Rodrigues, João Renato Rebelo Pinho                                                                                                                                                                                                                                                                                                                |
| EPI_ISL_861914                                                                                                                                                                                                                                                                                                 | Genomika Einstein                                                                                                                                                                               | LATE - Laboratório de Técnicas Especiais - Hospital Israelita Albert Einstein          | Deyvid Amgarten, Fernanda de Mello Malta, Raquel Riyuzo, Ana Paula Moreira Salles, Pedro Henrique Sebe Rodrigues, João Bosco Oliveira Filho, João Renato Rebelo Pinho                                                                                                                                                                                                                                                                                     |
| EPI_ISL_864980, EPI_ISL_865015, EPI_ISL_865016, EPI_ISL_865020                                                                                                                                                                                                                                                 | West of Scotland Specialist Virology Centre, NHSGGC / MRC-University of Glasgow Centre for Virus Research                                                                                       | COVID-19 Genomics UK (COG-UK) Consortium                                               | Ana da Silva Filipe, Natasha Johnson, Kathy Smollett, Daniel Mair, Stephen Carmichael, Alice Broos, Lily Tong, Jenna Nichols, Kyriaki Nomikou; Sarah McDonald; Richard Orton, Joseph Hughes, Sreenu Vattipally, David L Robertson; Alasdair MacLean, Rory Gunson; Sharif Shaaban, Matthew Holden; Rachel Blacow, Guy Mollett, Kathy Li, James Shepherd, Antonia Ho, Emma Thomson                                                                          |
| EPI_ISL_865115                                                                                                                                                                                                                                                                                                 | Virology Department, Royal Infirmary of Edinburgh, NHS Lothian / School of Biological Sciences, University of Edinburgh / Institute of Genetics and Molecular Medicine, University of Edinburgh | COVID-19 Genomics UK (COG-UK) Consortium                                               | McHugh M, Dewar R, Rooke S, Gallagher M, Balcaza C, O'Toole Á, Scher E, Hill V, McCrone JT, Colquhoun R, Yu X, Jackson B, Rambaut A, Williams TC, Templeton K                                                                                                                                                                                                                                                                                             |
| EPI_ISL_866056                                                                                                                                                                                                                                                                                                 | University College London Hospital                                                                                                                                                              | COVID-19 Genomics UK (COG-UK) Consortium                                               | Judith Heaney, Matthew Byott, Catherine Houlihan, Dan Frampton, Stuart Kirk, Moira Spyer and Eleni Nastouli                                                                                                                                                                                                                                                                                                                                               |
| EPI_ISL_866823                                                                                                                                                                                                                                                                                                 | Quadram Institute Bioscience                                                                                                                                                                    | COVID-19 Genomics UK (COG-UK) Consortium                                               | Dave J. Baker, Gemma L. Kay, Alp Aydin, Thanh Le-Viet, Steven Rudder, Ana P. Tedim, Anastasia Kolyva, Maria Diaz, Leonardo de Oliveira Martins, Nabil-Fareed Alikhan, Lizzie Meadows, Rachael Stanley, Ngozi Elumogo, Muhammed Yasir, Nicholas M. Thomson, Alexander J Trotter, Rachel Gilroy, Samuel Bloomfield, Claire Stuart, Andrew Bell, Reenesh Prakash, Samir Dervisevic, Alison E. Mather, John Wain, Mark Webber, Andrew J. Page, Justin O'Grady |
| EPI_ISL_868958, EPI_ISL_868981                                                                                                                                                                                                                                                                                 | Bioinformatics and Biostatistics Lab, Advanced Sequencing Facility                                                                                                                              | COVID-19 Genomics UK (COG-UK) Consortium                                               | Aengus Stewart,Jerome Nicod,Chelsea Sawyer,Laura Cubitt,Harshil Patel,Margaret Crawford                                                                                                                                                                                                                                                                                                                                                                   |
| EPI_ISL_872191, EPI_ISL_872192                                                                                                                                                                                                                                                                                 | Conjunto Hospitalar do Mandaqui de Sao Paulo                                                                                                                                                    | Instituto Adolfo Lutz, Interdisciplinary Procedures Center, Strategic Laboratory       | Claudio Tavares Sacchi, Claudia Regina Gonçalves, Erica Valessa Ramos Gomes, Karoline Rodrigues Campos, Katia Correa de Oliveira Santos, Ana Lucia de Carvalho Avelino, Fabiana Cristina Pereira dos Santos                                                                                                                                                                                                                                               |
| EPI_ISL_873080                                                                                                                                                                                                                                                                                                 | University of Michigan Clinical Microbiology Laboratory                                                                                                                                         | Lauring Lab, University of Michigan, Department of Microbiology and Immunology         | Valesano                                                                                                                                                                                                                                                                                                                                                                                                                                                  |
| EPI_ISL_873257                                                                                                                                                                                                                                                                                                 | M Health Fairview                                                                                                                                                                               | Minnesota Department of Health, Public Health Laboratory                               | Alexandra Lorentz, Jacob Garfin, Matt Plumb, and Xiong Wang                                                                                                                                                                                                                                                                                                                                                                                               |
| EPI_ISL_875048                                                                                                                                                                                                                                                                                                 | Lighthouse Lab in Milton Keynes                                                                                                                                                                 | Wellcome Sanger Institute for the COVID-19 Genomics UK (COG-UK) Consortium             | The Lighthouse Lab in Milton Keynes and Alex Alderton, Roberto Amato, Sonia Goncalves, Ewan Harrison, David K. Jackson, Ian Johnston, Dominic Kwiatkowski, Cordelia Langford, John Sillitoe on behalf of the Wellcome Sanger Institute COVID-19 Surveillance Team                                                                                                                                                                                         |
| EPI_ISL_875540, EPI_ISL_875541, EPI_ISL_875542, EPI_ISL_875543, EPI_ISL_875544, EPI_ISL_875545, EPI_ISL_875547, EPI_ISL_875548, EPI_ISL_875549, EPI_ISL_875550                                                                                                                                                 | Instituto de Biotecnologia - UNESP-Botucatu-SP                                                                                                                                                  | Instituto de Biotecnologia - UNESP-Botucatu-SP                                         | Leila Sabrina Ullmann; Fábio Sossai Possebon, Camila Dantas Malossi, Paula Rahal, Paulo Inacio da Costa, João Pessoa Araújo Jr.                                                                                                                                                                                                                                                                                                                           |
| EPI_ISL_875566, EPI_ISL_875567, EPI_ISL_875568                                                                                                                                                                                                                                                                 | SIESP L'AQUILA                                                                                                                                                                                  | Istituto Zooprofilattico Sperimentale dell'Abruzzo e Molise "G. Caporale"              | Lorusso A, Marcacci M, Di Domenico M, Ancora M, Curini V, Mangone I, Rinaldi A, Scialabba S, Di Pasquale A, Cammà C, Puglia I, Calistri P, Savini G                                                                                                                                                                                                                                                                                                       |
| EPI_ISL_875688                                                                                                                                                                                                                                                                                                 | National Influenza Center - Instituto Adolfo Lutz                                                                                                                                               | Instituto Adolfo Lutz, Interdisciplinary Procedures Center, Strategic Laboratory       | Claudio Tavares Sacchi, Claudia Regina Gonçalves, Erica Valessa Ramos Gomes, Karoline Rodrigues Campos, Katia Correa de Oliveira Santos, Ana Lucia de Carvalho Avelino, Clovis Roberto Abe Constantino                                                                                                                                                                                                                                                    |
| EPI_ISL_875689                                                                                                                                                                                                                                                                                                 | Hospital do Servidor Publico                                                                                                                                                                    | Instituto Adolfo Lutz, Interdisciplinary Procedures Center, Strategic Laboratory       | Claudio Tavares Sacchi, Claudia Regina Gonçalves, Erica Valessa Ramos Gomes, Karoline Rodrigues Campos                                                                                                                                                                                                                                                                                                                                                    |
| EPI_ISL_877765                                                                                                                                                                                                                                                                                                 | UCO Igiene e Sanità Pubblica, ASUGI, Trieste, Italy; Laboratorio di Virologia Molecolare, ICGEB, Trieste, Italy                                                                                 | Laboratorio di Genomica ed Epigenomica sistema Argo, Area SciencePark, Trieste, Italy; | Pierlanfranco D'Agaro,Danilo Licastro, Alessandro Marcello                                                                                                                                                                                                                                                                                                                                                                                                |
| EPI_ISL_877920                                                                                                                                                                                                                                                                                                 | Lighthouse Lab in Alderley Park                                                                                                                                                                 | Wellcome Sanger Institute for the COVID-19 Genomics UK (COG-UK) Consortium             | Jacquelyn Wynn, Mairead Hyland, The Lighthouse Lab in Alderley Park and Alex Alderton, Roberto Amato, Sonia Goncalves, Ewan Harrison, David K. Jackson, Ian Johnston, Dominic Kwiatkowski, Cordelia Langford, John Sillitoe on behalf of the Wellcome Sanger Institute COVID-19 Surveillance Team                                                                                                                                                         |
| EPI_ISL_882658                                                                                                                                                                                                                                                                                                 | Secretaria Municipal de Saude                                                                                                                                                                   | Instituto Adolfo Lutz, Interdisciplinary Procedures Center, Strategic Laboratory       | Claudio Tavares Sacchi, Claudia Regina Gonçalves, Erica Valessa Ramos Gomes, Karoline Rodrigues Campos                                                                                                                                                                                                                                                                                                                                                    |
| EPI_ISL_882659                                                                                                                                                                                                                                                                                                 | Centro de Triagem Covid19                                                                                                                                                                       | Instituto Adolfo Lutz, Interdisciplinary Procedures Center, Strategic Laboratory       | Claudio Tavares Sacchi, Claudia Regina Gonçalves, Erica Valessa Ramos Gomes, Karoline Rodrigues Campos                                                                                                                                                                                                                                                                                                                                                    |

|                                                                                                                                                                                                                |                                                                                                                                                                                                 |                                                                                                                                     |                                                                                                                                                                                                                                                                                                                                                                                                                                                                                   |
|----------------------------------------------------------------------------------------------------------------------------------------------------------------------------------------------------------------|-------------------------------------------------------------------------------------------------------------------------------------------------------------------------------------------------|-------------------------------------------------------------------------------------------------------------------------------------|-----------------------------------------------------------------------------------------------------------------------------------------------------------------------------------------------------------------------------------------------------------------------------------------------------------------------------------------------------------------------------------------------------------------------------------------------------------------------------------|
| EPI_ISL_882661, EPI_ISL_882662                                                                                                                                                                                 | Hospital de Santa Barbara de Goias                                                                                                                                                              | Instituto Adolfo Lutz, Interdisciplinary Procedures Center, Strategic Laboratory                                                    | Claudio Tavares Sacchi, Claudia Regina Gonçalves, Erica Valessa Ramos Gomes, Karoline Rodrigues Campos                                                                                                                                                                                                                                                                                                                                                                            |
| EPI_ISL_884249, EPI_ISL_884250                                                                                                                                                                                 | LATE - Laboratório de Técnicas Especiais - Hospital Israelita Albert Einstein                                                                                                                   | LATE - Laboratório de Técnicas Especiais - Hospital Israelita Albert Einstein                                                       | Deyvid Amgarten, Fernanda de Mello Malta, Raquel Riyuzo, Ana Paula Moreira Salles, Pedro Henrique Sebe Rodrigues, João Renato Rebelo Pinho                                                                                                                                                                                                                                                                                                                                        |
| EPI_ISL_888671, EPI_ISL_888672<br>EPI_ISL_890322                                                                                                                                                               | Instituto de Biotecnologia - UNESP-Botucatu-SP<br>KU Leuven, Rega Institute, Clinical and Epidemiological Virology                                                                              | Instituto de Biotecnologia - UNESP-Botucatu-SP<br>KU Leuven, Rega Institute, Clinical and Epidemiological Virology                  | Leila Sabrina Ullmann; Fábio Sossai Possebon, Camila Dantas Malossi, Paula Rahal, Paulo Inacio da Costa, João Pessoa Araújo Jr.<br>Tony Wawina-Bokalanga, Bert Vanmechelen, Joan Marti-Carerras, Piet Maes                                                                                                                                                                                                                                                                        |
| EPI_ISL_891940, EPI_ISL_892025,<br>EPI_ISL_892042, EPI_ISL_892155<br>EPI_ISL_896351                                                                                                                            | Lighthouse Lab in Alderley Park<br>New York Presbyterian Hospital                                                                                                                               | Wellcome Sanger Institute for the COVID-19 Genomics UK (COG-UK) Consortium<br>Wadsworth Center, New York State Department of Health | Jacquelyn Wynn, Mairead Hyland, The Lighthouse Lab in Alderley Park and Alex Alderton, Roberto Amato, Sonia Goncalves, Ewan Harrison, David K. Jackson, Ian Johnston, Dominic Kwiatkowski, Cordelia Langford, John Sillitoe on behalf of the Wellcome Sanger Institute COVID-19 Surveillance Team<br>Kirsten St. George, Daryl M. Lamson, Alexis Russel, Matthew Shudt, Melissa A Leisner, Jonathan Pitnick, Navjot Singh, John Kelly, Erasmus Schneider, Erica Lasek-Nesselquist |
| EPI_ISL_904018, EPI_ISL_904020,<br>EPI_ISL_904023, EPI_ISL_904028,<br>EPI_ISL_904030, EPI_ISL_904031                                                                                                           | DB Diagnosticos do Brasil                                                                                                                                                                       | Laboratório de Parasitologia Médica - Instituto de Medicina Tropical - Universidade de São Paulo                                    | Brazil-UK Centre for Arbovirus Discovery Diagnosis Genomics and Epidemiology (CADDE) Genomic Network - Instituto de Medicina Tropical                                                                                                                                                                                                                                                                                                                                             |
| EPI_ISL_904120, EPI_ISL_904121<br>EPI_ISL_906066                                                                                                                                                               | LACEN - Laboratório Central de Saúde Pública do Pará<br>Hospital Nipo Brasileiro                                                                                                                | Evandro Chagas Institute<br>Instituto Adolfo Lutz, Interdisciplinary Procedures Center, Strategic Laboratory                        | Santos, M.C.; Silva, A.M.; Junior, W.D.C.; Barbagelata, L.S.; Ferreira, J.A.; Sousa, E.M.A.; da Silva, P.S.; Pinheiro, K.C.; L.C.; Sousa Junior, E.C.<br>Claudio Tavares Sacchi, Claudia Regina Gonçalves, Erica Valessa Ramos Gomes, Karoline Rodrigues Campos                                                                                                                                                                                                                   |
| EPI_ISL_906067                                                                                                                                                                                                 | PS e Maternidade Nair Fonseca Leitao Arantes                                                                                                                                                    | Instituto Adolfo Lutz, Interdisciplinary Procedures Center, Strategic Laboratory                                                    | Claudio Tavares Sacchi, Claudia Regina Gonçalves, Erica Valessa Ramos Gomes, Karoline Rodrigues Campos                                                                                                                                                                                                                                                                                                                                                                            |
| EPI_ISL_906068, EPI_ISL_906069                                                                                                                                                                                 | Instituto Adolfo Lutz - Regional de Campinas                                                                                                                                                    | Instituto Adolfo Lutz, Interdisciplinary Procedures Center, Strategic Laboratory                                                    | Claudio Tavares Sacchi, Claudia Regina Gonçalves, Erica Valessa Ramos Gomes, Karoline Rodrigues Campos                                                                                                                                                                                                                                                                                                                                                                            |
| EPI_ISL_906071                                                                                                                                                                                                 | LACEN-PI DR. Costa Alvarenga                                                                                                                                                                    | Instituto Adolfo Lutz, Interdisciplinary Procedures Center, Strategic Laboratory                                                    | Claudio Tavares Sacchi, Claudia Regina Gonçalves, Erica Valessa Ramos Gomes, Karoline Rodrigues Campos                                                                                                                                                                                                                                                                                                                                                                            |
| EPI_ISL_906075                                                                                                                                                                                                 | Hospital Geral de Vila Penteado Dr Jose Pangella Sao Paulo                                                                                                                                      | Instituto Adolfo Lutz, Interdisciplinary Procedures Center, Strategic Laboratory                                                    | Claudio Tavares Sacchi, Claudia Regina Gonçalves, Erica Valessa Ramos Gomes, Karoline Rodrigues Campos                                                                                                                                                                                                                                                                                                                                                                            |
| EPI_ISL_906076, EPI_ISL_906077                                                                                                                                                                                 | Hospital Sao Luiz Sao Caetano                                                                                                                                                                   | Instituto Adolfo Lutz, Interdisciplinary Procedures Center, Strategic Laboratory                                                    | Claudio Tavares Sacchi, Claudia Regina Gonçalves, Erica Valessa Ramos Gomes, Karoline Rodrigues Campos                                                                                                                                                                                                                                                                                                                                                                            |
| EPI_ISL_906080, EPI_ISL_906081                                                                                                                                                                                 | Hospital Beneficiencia Portuguesa                                                                                                                                                               | Instituto Adolfo Lutz, Interdisciplinary Procedures Center, Strategic Laboratory                                                    | Claudio Tavares Sacchi, Claudia Regina Gonçalves, Erica Valessa Ramos Gomes, Karoline Rodrigues Campos                                                                                                                                                                                                                                                                                                                                                                            |
| EPI_ISL_911195                                                                                                                                                                                                 | Laboratoire national de sante, Microbiology, Virology                                                                                                                                           | Laboratoire national de sante, Microbiology, Microbial Genomics Platform                                                            | Anke Wienecke-Baldacchino, Catherine Ragimbeau, Jessica Tapp, Fatu Djabi, Lise Pignon, Raoul Salmon, Tamir Abdelrahman                                                                                                                                                                                                                                                                                                                                                            |
| EPI_ISL_913587                                                                                                                                                                                                 | Vault Health                                                                                                                                                                                    | Minnesota Department of Health, Public Health Laboratory                                                                            | Alexandra Lorentz, Jacob Garfin, Matt Plumb, and Xiong Wang                                                                                                                                                                                                                                                                                                                                                                                                                       |
| EPI_ISL_913666                                                                                                                                                                                                 | Cerballiance                                                                                                                                                                                    | CNR Virus des Infections Respiratoires - France SUD                                                                                 | Antonin Bal, Gregory Destras, Gwendolynne Burfin, Hadrien Règue, Quentin Semanas, Martine Valette, Bruno Lina, Laurence Josset                                                                                                                                                                                                                                                                                                                                                    |
| EPI_ISL_914039                                                                                                                                                                                                 | United States Air Force School of Aerospace Medicine                                                                                                                                            | U.S. Air Force School of Aerospace Medicine                                                                                         | Anthony Fries, Jennifer Meyer, William Gruner, William Buggele, Amanda Javorina, Sarah Purves, Clarise Starr, Elizabeth Macias                                                                                                                                                                                                                                                                                                                                                    |
| EPI_ISL_916541, EPI_ISL_916548,<br>EPI_ISL_917915, EPI_ISL_917916,<br>EPI_ISL_918032                                                                                                                           | Lighthouse Lab in Glasgow                                                                                                                                                                       | Wellcome Sanger Institute for the COVID-19 Genomics UK (COG-UK) Consortium                                                          | Harper VanSteenhouse, Yumi Kasai, David Gray, Carol Clugston, Anna Dominiczak and Alex Alderton, Roberto Amato, Sonia Goncalves, Ewan Harrison, David K. Jackson, Ian Johnston, Dominic Kwiatkowski, Cordelia Langford, John Sillitoe on behalf of the Wellcome Sanger Institute COVID-19 Surveillance Team                                                                                                                                                                       |
| EPI_ISL_918499, EPI_ISL_918500, EPI_ISL_918501, EPI_ISL_918502, EPI_ISL_918503, EPI_ISL_918504, EPI_ISL_918505, EPI_ISL_918506, EPI_ISL_918507, EPI_ISL_918508, EPI_ISL_918509, EPI_ISL_918510, EPI_ISL_918511 | see above                                                                                                                                                                                       | LACEN - Laboratório Central de Saúde Pública do Amazonas<br>Evandro Chagas Institute                                                | Santos, M.C.; Silva, A.M.; Junior, W.D.C.; Barbagelata, L.S.; Ferreira, J.A.; Sousa, E.M.A.; da Silva, P.S.; Pinheiro, K.C.; L.C.; Sousa Junior, E.C.                                                                                                                                                                                                                                                                                                                             |
| EPI_ISL_918515                                                                                                                                                                                                 | LACEN - Laboratório Central de Saúde Pública do Para                                                                                                                                            | Evandro Chagas Institute                                                                                                            | Santos, M.C.; Silva, A.M.; Junior, W.D.C.; Barbagelata, L.S.; Ferreira, J.A.; Sousa, E.M.A.; da Silva, P.S.; Pinheiro, K.C.; L.C.; Sousa Junior, E.C.                                                                                                                                                                                                                                                                                                                             |
| EPI_ISL_918531, EPI_ISL_918532,<br>EPI_ISL_918533                                                                                                                                                              | LACEN - Laboratório Central de Saúde Pública do Amazonas                                                                                                                                        | Evandro Chagas Institute                                                                                                            | Santos, M.C.; Silva, A.M.; Junior, W.D.C.; Barbagelata, L.S.; Ferreira, J.A.; Sousa, E.M.A.; da Silva, P.S.; Pinheiro, K.C.; L.C.; Sousa Junior, E.C.                                                                                                                                                                                                                                                                                                                             |
| EPI_ISL_919279                                                                                                                                                                                                 | West of Scotland Specialist Virology Centre, NHSGGC / MRC-University of Glasgow Centre for Virus Research                                                                                       | COVID-19 Genomics UK (COG-UK) Consortium                                                                                            | Ana da Silva Filipe, Natasha Johnson, Kathy Smollett, Daniel Mair, Stephen Carmichael, Alice Broos, Lily Tong, Jenna Nichols, Kyriaki Nomikou; Sarah McDonald; Richard Orton, Joseph Hughes, Sreenu Vattipally, David L Robertson; Alasdair MacLean, Rory Gunson; Sharif Shaaban, Matthew Holden; Rachel Blacow, Guy Mollett, Kathy Li, James Shepherd, Antonia Ho, Emma Thomson                                                                                                  |
| EPI_ISL_919333                                                                                                                                                                                                 | Virology Department, Royal Infirmary of Edinburgh, NHS Lothian / School of Biological Sciences, University of Edinburgh / Institute of Genetics and Molecular Medicine, University of Edinburgh | COVID-19 Genomics UK (COG-UK) Consortium                                                                                            | McHugh M, Dewar R, Rooke S, Gallagher M, Balcaza C, O'Toole Á, Scher E, Hill V, McCrone JT, Colquhoun R, Yu X, Jackson B, Rambaut A, Williams TC, Templeton K                                                                                                                                                                                                                                                                                                                     |
| EPI_ISL_920984, EPI_ISL_921013,<br>EPI_ISL_921014, EPI_ISL_921023,<br>EPI_ISL_921087, EPI_ISL_921126                                                                                                           | Regional Virus Laboratory, Belfast Health and Social Care Trust                                                                                                                                 | COVID-19 Genomics UK (COG-UK) Consortium                                                                                            | Conall McCaughey, James McKenna, Tanya Curran, Susan Feeney, Alison Watt, Ciara Cox, Mairead Connor, Zoltan Molnar, David Simpson, Derek Fairley                                                                                                                                                                                                                                                                                                                                  |
| EPI_ISL_922444, EPI_ISL_922537,<br>EPI_ISL_922734, EPI_ISL_922740,<br>EPI_ISL_922793, EPI_ISL_923137                                                                                                           | Wales Specialist Virology Centre Sequencing lab: Pathogen Genomics Unit                                                                                                                         | Public Health Wales Microbiology Cardiff Wales Specialist Virology Centre                                                           | Catherine Moore, Johnathan Evans, Laura Gifford, Malorie Perry, Simon Cottrell, Angela Marchbank, Alec Birchley, Alexander Adams, Amy Gaskin, Bree Gatica-Wilcox, Jason Coombes, Joel Southgate, Lauren Gilbert, Lee Graham, Nicole Pacchiariini, Sara Kumziene-Summerhayes, Sarah Taylor, Sophie Jones, Sara Rey, Matthew Bull, Joanne Watkins, Sally Corden, Tom Connor                                                                                                         |
| EPI_ISL_925031, EPI_ISL_925032                                                                                                                                                                                 | Mirialis                                                                                                                                                                                        | CNR Virus des Infections Respiratoires - France SUD                                                                                 | Antonin Bal, Gregory Destras, Gwendolynne Burfin, Hadrien Règue, Quentin Semanas, Martine Valette, Bruno Lina, Laurence Josset                                                                                                                                                                                                                                                                                                                                                    |
| EPI_ISL_925916, EPI_ISL_926446                                                                                                                                                                                 | LACEN - Laboratório Central de Saúde Pública do Amazonas                                                                                                                                        | Evandro Chagas Institute Virology                                                                                                   | Santos, M.C.; Silva, A.M.; Junior, W.D.C.; Barbagelata, L.S.; Ferreira, J.A.; Sousa, E.M.A.; da Silva, P.S.; Pinheiro, K.C.; L.C.; Sousa Junior, E.C.                                                                                                                                                                                                                                                                                                                             |
| EPI_ISL_930856, EPI_ISL_930857                                                                                                                                                                                 | Central Laboratory of Public Health of Rio Grande do Sul (Lacen-RS)                                                                                                                             | State Center for Health Surveillance of the Health Department of the State of Rio Grande do Sul (CEVS/SES-RS)                       | Barcellos R, Campos A, Dornelles C, Godinho F, Gonzalez A, Gregianini T, Molina C, Salvato R, Schaurich A,                                                                                                                                                                                                                                                                                                                                                                        |
| EPI_ISL_931737                                                                                                                                                                                                 | Lighthouse Lab in Alderley Park                                                                                                                                                                 | Wellcome Sanger Institute for the COVID-19 Genomics UK (COG-UK) Consortium                                                          | Jacquelyn Wynn, Mairead Hyland, The Lighthouse Lab in Alderley Park and Alex Alderton, Roberto Amato, Sonia Goncalves, Ewan Harrison, David K. Jackson, Ian Johnston, Dominic Kwiatkowski, Cordelia Langford, John Sillitoe on behalf of the Wellcome Sanger Institute COVID-19 Surveillance Team                                                                                                                                                                                 |
| EPI_ISL_933487                                                                                                                                                                                                 | Lighthouse Lab in Milton Keynes                                                                                                                                                                 | Wellcome Sanger Institute for the COVID-19 Genomics UK (COG-UK) Consortium                                                          | The Lighthouse Lab in Milton Keynes and Alex Alderton, Roberto Amato, Sonia Goncalves, Ewan Harrison, David K. Jackson, Ian Johnston, Dominic Kwiatkowski, Cordelia Langford, John Sillitoe on behalf of the Wellcome Sanger Institute COVID-19 Surveillance Team                                                                                                                                                                                                                 |
| EPI_ISL_936576                                                                                                                                                                                                 | Northwestern Memorial Hospital                                                                                                                                                                  | Ozer Lab                                                                                                                            | Ramon Lorenzo-Redondo, Lacy M. Simons, Chad J. Achenbach, Lawrence J. Jennings, Michael G. Ison, Judd F. Hultquist, Egon A. Ozer                                                                                                                                                                                                                                                                                                                                                  |
| EPI_ISL_940608                                                                                                                                                                                                 | Laboratório Sao Lucas                                                                                                                                                                           | Instituto Adolfo Lutz, Interdisciplinary Procedures Center, Strategic Laboratory                                                    | Claudio Tavares Sacchi, Claudia Regina Gonçalves, Erica Valessa Ramos Gomes, Karoline Rodrigues Campos                                                                                                                                                                                                                                                                                                                                                                            |
| EPI_ISL_940614, EPI_ISL_940615,<br>EPI_ISL_940616, EPI_ISL_940617,<br>EPI_ISL_940618                                                                                                                           | LACEN-PI DR. Costa Alvarenga                                                                                                                                                                    | Instituto Adolfo Lutz, Interdisciplinary Procedures Center, Strategic Laboratory                                                    | Claudio Tavares Sacchi, Claudia Regina Gonçalves, Erica Valessa Ramos Gomes, Karoline Rodrigues Campos                                                                                                                                                                                                                                                                                                                                                                            |
| EPI_ISL_940619, EPI_ISL_940620,                                                                                                                                                                                | Hospital Sao Joaquim - Beneficiencia Portuguesa                                                                                                                                                 | Instituto Adolfo Lutz, Interdisciplinary Procedures Center,                                                                         | Claudio Tavares Sacchi, Claudia Regina Gonçalves, Erica Valessa Ramos Gomes, Karoline Rodrigues Campos                                                                                                                                                                                                                                                                                                                                                                            |

|                                                                                                                                                |                                                                                                                                                                                                                     |                                                                                                                                                   |                                                                                                                                                                                                                                                                                                                                                                                                                                                                |
|------------------------------------------------------------------------------------------------------------------------------------------------|---------------------------------------------------------------------------------------------------------------------------------------------------------------------------------------------------------------------|---------------------------------------------------------------------------------------------------------------------------------------------------|----------------------------------------------------------------------------------------------------------------------------------------------------------------------------------------------------------------------------------------------------------------------------------------------------------------------------------------------------------------------------------------------------------------------------------------------------------------|
| EPI_ISL_940621, EPI_ISL_940622, EPI_ISL_940623, EPI_ISL_940624, EPI_ISL_940625                                                                 |                                                                                                                                                                                                                     | Strategic Laboratory                                                                                                                              |                                                                                                                                                                                                                                                                                                                                                                                                                                                                |
| EPI_ISL_940626, EPI_ISL_940627                                                                                                                 | Hospital Central Sao Caetano do Sul                                                                                                                                                                                 | Instituto Adolfo Lutz, Interdisciplinary Procedures Center, Strategic Laboratory                                                                  | Claudio Tavares Sacchi, Claudia Regina Gonçalves, Erica Valessa Ramos Gomes, Karoline Rodrigues Campos                                                                                                                                                                                                                                                                                                                                                         |
| EPI_ISL_940630                                                                                                                                 | Hospital Geral de Sao Paulo                                                                                                                                                                                         | Instituto Adolfo Lutz, Interdisciplinary Procedures Center, Strategic Laboratory                                                                  | Claudio Tavares Sacchi, Claudia Regina Gonçalves, Erica Valessa Ramos Gomes, Karoline Rodrigues Campos                                                                                                                                                                                                                                                                                                                                                         |
| EPI_ISL_940924                                                                                                                                 | Centers for Disease Control and Prevention, Dengue Branch                                                                                                                                                           | Centers for Disease Control and Prevention, Dengue Branch                                                                                         | Gilberto A. Santiago, Glenda Gonzalez, Betzabel Flores, Keyla Charriez, Gabriela Paz-Bailey, Jorge L. Munoz-Jordan                                                                                                                                                                                                                                                                                                                                             |
| EPI_ISL_941550, EPI_ISL_941552                                                                                                                 | Instituto Nacional de Saude (INSA)                                                                                                                                                                                  | Instituto Nacional de Saude (INSA)                                                                                                                | Borges et al                                                                                                                                                                                                                                                                                                                                                                                                                                                   |
| EPI_ISL_941896                                                                                                                                 | Instituto Nacional de Saude (INSA) and Instituto Gulbenkian de Ciencia (IGC)                                                                                                                                        | Instituto Nacional de Saude (INSA) and Instituto Gulbenkian de Ciencia (IGC)                                                                      | Borges et al                                                                                                                                                                                                                                                                                                                                                                                                                                                   |
| EPI_ISL_942896, EPI_ISL_942898                                                                                                                 | Central Laboratory of Public Health of Rio Grande do Sul (Lacen-RS)                                                                                                                                                 | State Center for Health Surveillance of the Health Department of the State of Rio Grande do Sul (CEVS/SES-RS)                                     | Barcellos R, Campos A, Crescente L, Da Silva A, Dornelles C, Fonseca V, Garay L, Godinho F, Gonzalez A, Gregjani N, Molina C, Salvato R, Schaurich A                                                                                                                                                                                                                                                                                                           |
| EPI_ISL_943045, EPI_ISL_943046                                                                                                                 | Dutch COVID-19 response team                                                                                                                                                                                        | National Institute for Public Health and the Environment (RIVM)                                                                                   | Adam Meijer, Harry Vennema, Dirk Eggink, Jeroen Cremer, Sharon van den Brink, Bas van der Veer, AnneMarie van den Brandt, Florian Zwagemaker, Dennis Schmitz, Chantal Reusken, on behalf of the national COVID-19 response team                                                                                                                                                                                                                                |
| EPI_ISL_943570                                                                                                                                 | Laboratorio de Referencia Nacional de Virus Respiratorio. Instituto Nacional de Salud Perú                                                                                                                          | Laboratorio de Referencia Nacional de Biotecnología y Biología Molecular. Instituto Nacional de Salud Perú                                        | Carlos Padilla Rojas, Karolyn Vega Chozo, Luis Barcelona, Priscila Lope Pari, Omar Caceres Rey, Marco Galarza Perez, Maribel Huaranga Nuñez, Johanna Balbuena Torrez, Henri Bailon Calderon, Nancy Rojas Serrano                                                                                                                                                                                                                                               |
| EPI_ISL_943581, EPI_ISL_943584, EPI_ISL_943597, EPI_ISL_943599, EPI_ISL_943602, EPI_ISL_943603, EPI_ISL_943609, EPI_ISL_943611                 | Central Laboratory of Public Health of Rio Grande do Sul (Lacen-RS)                                                                                                                                                 | State Center for Health Surveillance of the Health Department of the State of Rio Grande do Sul (CEVS/SES-RS)                                     | Aline Campos, Amanda da Silva, Anelise Schaurich, Claudia Dornelles, Cynthia Molina, Fernanda Godinho, Lara Crescente, Leticia Garay, Regina Barcellos, Richard Salvato, Tatiana Gregjani, Vagner Fonseca                                                                                                                                                                                                                                                      |
| EPI_ISL_943967, EPI_ISL_943968, EPI_ISL_943969, EPI_ISL_943970, EPI_ISL_943971, EPI_ISL_943972                                                 | Hospital Geral de Sao Paulo                                                                                                                                                                                         | Instituto Adolfo Lutz, Interdisciplinary Procedures Center, Strategic Laboratory                                                                  | Claudio Tavares Sacchi, Claudia Regina Gonçalves, Erica Valessa Ramos Gomes, Karoline Rodrigues Campos                                                                                                                                                                                                                                                                                                                                                         |
| EPI_ISL_943974, EPI_ISL_943975, EPI_ISL_943976, EPI_ISL_943977, EPI_ISL_943978, EPI_ISL_943979, EPI_ISL_943981, EPI_ISL_943985, EPI_ISL_943987 | LACEN do Estado de Tocantins                                                                                                                                                                                        | Instituto Adolfo Lutz, Interdisciplinary Procedures Center, Strategic Laboratory                                                                  | Claudio Tavares Sacchi, Claudia Regina Gonçalves, Erica Valessa Ramos Gomes, Karoline Rodrigues Campos                                                                                                                                                                                                                                                                                                                                                         |
| EPI_ISL_943988, EPI_ISL_943990                                                                                                                 | LACEN do Estado de Goias                                                                                                                                                                                            | Instituto Adolfo Lutz, Interdisciplinary Procedures Center, Strategic Laboratory                                                                  | Claudio Tavares Sacchi, Claudia Regina Gonçalves, Erica Valessa Ramos Gomes, Karoline Rodrigues Campos                                                                                                                                                                                                                                                                                                                                                         |
| EPI_ISL_944890, EPI_ISL_945951, EPI_ISL_945954, EPI_ISL_946351                                                                                 | Lighthouse Lab in Glasgow                                                                                                                                                                                           | Wellcome Sanger Institute for the COVID-19 Genomics UK (COG-UK) Consortium                                                                        | Harper VanSteenhouse, Yumi Kasai, David Gray, Carol Clugston, Anna Dominiczak and Alex Alderton, Roberto Amato, Sonia Goncalves, Ewan Harrison, David K. Jackson, Ian Johnston, Dominic Kwiatkowski, Cordelia Langford, John Sillitoe on behalf of the Wellcome Sanger Institute COVID-19 Surveillance Team                                                                                                                                                    |
| EPI_ISL_947877, EPI_ISL_947878, EPI_ISL_947998                                                                                                 | Lighthouse Lab in Alderley Park                                                                                                                                                                                     | Wellcome Sanger Institute for the COVID-19 Genomics UK (COG-UK) Consortium                                                                        | Jacquelyn Wynn, Mairead Hyland, The Lighthouse Lab in Alderley Park and Alex Alderton, Roberto Amato, Sonia Goncalves, Ewan Harrison, David K. Jackson, Ian Johnston, Dominic Kwiatkowski, Cordelia Langford, John Sillitoe on behalf of the Wellcome Sanger Institute COVID-19 Surveillance Team                                                                                                                                                              |
| EPI_ISL_949625, EPI_ISL_949627                                                                                                                 | West of Scotland Specialist Virology Centre, NHSGGC / MRC-University of Glasgow Centre for Virus Research                                                                                                           | COVID-19 Genomics UK (COG-UK) Consortium                                                                                                          | Ana da Silva Filipe, Natasha Johnson, Kathy Smollett, Daniel Mair, Stephen Carmichael, Alice Broos, Lily Tong, Jenna Nichols, Kyriaki Nomikou, Sarah McDonald, Richard Orton, Joseph Hughes, Sreenu Vattipally, David L Robertson, Alasdair MacLean, Rory Gunson, Sharif Shaaban, Matthew Holden, Rachel Blacow, Guy Mollett, Kathy Li, James Shepherd, Antonia Ho, Emma Thomson                                                                               |
| EPI_ISL_949902, EPI_ISL_949919, EPI_ISL_949948                                                                                                 | University College London, Great Ormond Street Hospital for Children NHS Foundation Trust, Imperial College Healthcare NHS Trust                                                                                    | COVID-19 Genomics UK (COG-UK) Consortium                                                                                                          | Sergi Castellano, Rachel Williams, Mark Kristiansen, Paola Resende Silva, Sunando Roy, Tony Brooks, Helena Tutill, Paola Niola, Patricia Dyal, Charlotte Williams, Leysa Forrest, Yasmin Panchbhaya, Jacqueline Findlay, Samuel Weeks, Julianne Brown, Kathryn Harris, Paul Randell, James Price, Alison Holmes, Judith Breuer                                                                                                                                 |
| EPI_ISL_950459                                                                                                                                 | Northumbria University / South Tees Hospitals NHS Foundation Trust / North Cumbria Integrated Care NHS Foundation Trust / North Tees and Hartlepool NHS Foundation Trust / Newcastle Hospitals NHS Foundation Trust | COVID-19 Genomics UK (COG-UK) Consortium                                                                                                          | Darren L Smith, Andrew Nelson, Matthew Bashton, Greg R Young, Joshua Loh, John Allan, Mohammad A Tariq, Giles S Holt, Gary Black, Wen C Yew, Lynn Dover, Paul Baker, Steve Liggett, Sarah Essex, Jane Holmes, Matthew Carlisle, Christopher Moore, Fei Sang, Johnny Debebe, Victoria Wright, Matthew Loose                                                                                                                                                     |
| EPI_ISL_950728                                                                                                                                 | Queens Medical Centre, Clinical Microbiology Department / DeepSeq Nottingham                                                                                                                                        | COVID-19 Genomics UK (COG-UK) Consortium                                                                                                          | Gemma Clark, Wendy Smith, Manjinder Khakh, Vicki M Fleming, Michelle M Lister, Hannah Howson-Wells, Jonathan Ball, Patrick McClure, Joseph Chappell, Theocharis Tsoleridis, Nadine Holmes, Matthew Carlisle, Christopher Moore, Fei Sang, Johnny Debebe, Victoria Wright, Matthew Loose                                                                                                                                                                        |
| EPI_ISL_951024                                                                                                                                 | Oxford Viromics, NDM, University of Oxford; Oxford University Hospitals; Basingstoke and North Hampshire Hospital                                                                                                   | COVID-19 Genomics UK (COG-UK) Consortium                                                                                                          | Tanya Golubchik, David Bonsall, George Macintyre, Amy Trebes, Mariateresa de Cesare, Catrin Moore, Alex Mobbs, Anita Justice, Robert Shaw, Monique Andersson, Timothy Peto, Emma Wise, Nathan Moore, Jessica Lynch, Nick Cortes, Matilde Mori, Stephen Kidd, David Buck, John Todd, Christophe Fraser                                                                                                                                                          |
| EPI_ISL_951562, EPI_ISL_951592, EPI_ISL_951651, see above                                                                                      | Originating lab: Wales Specialist Virology Centre Sequencing lab: Pathogen Genomics Unit                                                                                                                            | Public Health Wales Microbiology Cardiff Wales Specialist Virology Centre                                                                         | Catherine Moore, Johnathan Evans, Laura Gifford, Malorie Perry, Simon Cottrell, Angela Marchbank, Alec Birchley, Alexander Adams, Amy Gaskin, Bree Gatica-Wilcox, Jason Coombes, Joel Southgate, Lauren Gilbert, Lee Graham, Nicole Pacchiarini, Sara Kumziene-Summerhayes, Sarah Taylor, Sophie Jones, Sara Rey, Matthew Bull, Joanne Watkins, Sally Corden, Tom Connor                                                                                       |
| EPI_ISL_952479                                                                                                                                 | Centre for Enzyme Innovation, University of Portsmouth / Translational Research Laboratory, Portsmouth Hospitals NHS Trust                                                                                          | COVID-19 Genomics UK (COG-UK) Consortium                                                                                                          | Angela Beckett, Salman Goudarzi, Christopher Fearn, Kate Cook, Katie Loveson, Sharon Glaysher, Scott Elliott, Samuel Robson                                                                                                                                                                                                                                                                                                                                    |
| EPI_ISL_952956, EPI_ISL_952961                                                                                                                 | Virology Department, Sheffield Teaching Hospitals NHS Foundation Trust/Department of Infection, Immunity and Cardiovascular Disease, The Medical School, University of Sheffield                                    | COVID-19 Genomics UK (COG-UK) Consortium                                                                                                          | Thushan de Silva, Matthew Parker, Nikki Smith, Adri Agyal, Rebecca Brown, Luke Green, Rachel Tucker, Paul Parsons, Danielle Groves, Katie Johnson, Laura Carrilero, Alex Keeley, Dave Partridge, Matthew Wyles, Benjamin Lindsey, Mehmet Yavuz, Mohammad Raza, Cariad Evans                                                                                                                                                                                    |
| EPI_ISL_955192                                                                                                                                 | Instituto Nacional de Medicina Genomica                                                                                                                                                                             | Instituto Nacional de Medicina Genomica                                                                                                           | Hidalgo-Miranda A, Mendoza-Vargas A, Reyes-Grageda JP, Cisneros-Villanueva M, Cedro-Tanda A, Peñafoza-Figueroa F, Herrera-Montalvo LA                                                                                                                                                                                                                                                                                                                          |
| EPI_ISL_956287, EPI_ISL_956288, EPI_ISL_956289, EPI_ISL_956291, EPI_ISL_956292, EPI_ISL_956293, EPI_ISL_956295, EPI_ISL_956297                 | Instituto Nacional de Salud- Dirección de Redes de Laboratorios de Salud Pública                                                                                                                                    | Instituto Nacional de Salud- Dirección de Investigación en Salud Pública                                                                          | Katherine Laiton-Donato, Diego A. Álvarez-Díaz, Carlos Franco-Muñoz, Mauricio Pacheco-Montealegre, Hector Alejandro Ruiz-Moreno, Maria T. Herrera-Sepúlveda, Diego Andrés Prada, Jhonatan Reales-González, Sheryll Corchuelo, Julian Naizaque, Gerardo Santamaría, Magdalena Wiesner, Martha Lucia Ospina Martínez, Marcela Mercado-Reyes                                                                                                                      |
| EPI_ISL_960776                                                                                                                                 | Germano de Sousa                                                                                                                                                                                                    | Instituto Gulbenkian de Ciencia                                                                                                                   | João Costa, João Sobral, Maria Costa, Susana Ladeiro, Cathy Paulino, Ricardo Leite                                                                                                                                                                                                                                                                                                                                                                             |
| EPI_ISL_961766                                                                                                                                 | Laboratorio de Infectología, Servicio de Infectología, Hospital Universitario Dr. José Eleuterio González - Universidad Autónoma de Nuevo León                                                                      | Laboratorio de Infectología Molecular, Departamento de Bioquímica y Medicina Molecular, Facultad de Medicina - Universidad Autónoma de Nuevo León | Kame A. Galán-Huerta, María F. Herrera-Saldívar, Natalia Martínez-Acuña, Sonia A. Lozano-Sepúlveda, Daniel Arellanos-Soto, Ana M. Rivas-Estilla, Paola Bocanegra-Ibarias, Samantha M. Flores-Treviño, Elvira Garza-González, Eduardo Perez-Alba, Laura Nuzzolo-Shihadeh, Adrian Camacho-Ortiz                                                                                                                                                                  |
| EPI_ISL_967184                                                                                                                                 | Helix/illumina                                                                                                                                                                                                      | Respiratory Viruses Branch, Division of Viral Diseases, Centers for Disease Control and Prevention                                                | Peter W. Cook, Dakota Howard, Dhvani Batra, Ben L. Rambo-Martin, Eileen de Feo, Jan Antico, Christine Tran, Matthew Tolentino, Shannon Wickline, Kim Gietzen, Brad Sickler, Jingtao Liu, Eric Allen, Phil Febbo, Summer Galloway, Nicole L. Washington, Simon White, Geraint Levan, Kelly Schiabor Barrett, Elizabeth Cirulli, Alexandre Bolze, Ary Ascencio, Charlotte Rivera-Garcia, Ryan Cho, Jason Nguyen, Sherry Wang, Jimmy Ramirez, Tyler Cassens, Eren |



|                                                                                                                                                |                                                                     |                                                                                                                                                   |                                                                                                                                                                                                                                                                                                                                                                                           |
|------------------------------------------------------------------------------------------------------------------------------------------------|---------------------------------------------------------------------|---------------------------------------------------------------------------------------------------------------------------------------------------|-------------------------------------------------------------------------------------------------------------------------------------------------------------------------------------------------------------------------------------------------------------------------------------------------------------------------------------------------------------------------------------------|
| EPI_ISL_976950, EPI_ISL_976998                                                                                                                 | Broad Institute Clinical Research Sequencing Platform               | Infectious Disease Program, Broad Institute of Harvard and MIT                                                                                    | Sandoval,Magnus Isaksson,William Lee,David Becker,Marc Laurent,James Lu,Clinton R. Paden,Suxiang Tong,Duncan MacCannell, Lemieux,J.E., Siddle,K.J., Adams,G., Gladden-Young,A., Lagerborg,K., Rudy,M., DeRuff,K., Carter,A., Normandin,E., Bauer,M., Reilly,S., Tomkins-Tinch,C., Loreth,C., Chaluvadi,S., Birren,B.W., Gallagher,G., Smole,S., Park,D.J., MacInnis,B.L., and Sabeti,P.C. |
| EPI_ISL_977471                                                                                                                                 | Instituto Adolfo Lutz - Regional de Presidente Prudente             | Instituto Adolfo Lutz, Interdisciplinary Procedures Center, Strategic Laboratory                                                                  | Claudio Tavares Sacchi, Claudia Regina Gonçalves, Erica Valessa Ramos Gomes, Karoline Rodrigues Campos                                                                                                                                                                                                                                                                                    |
| EPI_ISL_977472, EPI_ISL_977473, EPI_ISL_977474                                                                                                 | Instituto Adolfo Lutz Central                                       | Instituto Adolfo Lutz, Interdisciplinary Procedures Center, Strategic Laboratory                                                                  | Claudio Tavares Sacchi, Claudia Regina Gonçalves, Erica Valessa Ramos Gomes, Karoline Rodrigues Campos                                                                                                                                                                                                                                                                                    |
| EPI_ISL_977475                                                                                                                                 | Instituto Adolfo Lutz - Regional de Presidente Prudente             | Instituto Adolfo Lutz, Interdisciplinary Procedures Center, Strategic Laboratory                                                                  | Claudio Tavares Sacchi, Claudia Regina Gonçalves, Erica Valessa Ramos Gomes, Karoline Rodrigues Campos                                                                                                                                                                                                                                                                                    |
| EPI_ISL_977476                                                                                                                                 | Instituto Adolfo Lutz Central                                       | Instituto Adolfo Lutz, Interdisciplinary Procedures Center, Strategic Laboratory                                                                  | Claudio Tavares Sacchi, Claudia Regina Gonçalves, Erica Valessa Ramos Gomes, Karoline Rodrigues Campos                                                                                                                                                                                                                                                                                    |
| EPI_ISL_977478, EPI_ISL_977480, EPI_ISL_977481                                                                                                 | Instituto Adolfo Lutz - Regional de Presidente Prudente             | Instituto Adolfo Lutz, Interdisciplinary Procedures Center, Strategic Laboratory                                                                  | Claudio Tavares Sacchi, Claudia Regina Gonçalves, Erica Valessa Ramos Gomes, Karoline Rodrigues Campos                                                                                                                                                                                                                                                                                    |
| EPI_ISL_977483, EPI_ISL_977484                                                                                                                 | Instituto Adolfo Lutz Central                                       | Instituto Adolfo Lutz, Interdisciplinary Procedures Center, Strategic Laboratory                                                                  | Claudio Tavares Sacchi, Claudia Regina Gonçalves, Erica Valessa Ramos Gomes, Karoline Rodrigues Campos                                                                                                                                                                                                                                                                                    |
| EPI_ISL_977485, EPI_ISL_977488                                                                                                                 | Instituto Adolfo Lutz - Regional de Presidente Prudente             | Instituto Adolfo Lutz, Interdisciplinary Procedures Center, Strategic Laboratory                                                                  | Claudio Tavares Sacchi, Claudia Regina Gonçalves, Erica Valessa Ramos Gomes, Karoline Rodrigues Campos                                                                                                                                                                                                                                                                                    |
| EPI_ISL_977955                                                                                                                                 | Chiu Laboratory, University of California, San Francisco            | Chiu Laboratory, University of California, San Francisco                                                                                          | Charles Chiu, Xianding (Wayne) Deng, Candace Wang, Venice Servellita, Jill Hacker, Debra Wadford                                                                                                                                                                                                                                                                                          |
| EPI_ISL_978498, EPI_ISL_978506, EPI_ISL_978515, EPI_ISL_978517, EPI_ISL_978518, EPI_ISL_978525, EPI_ISL_978529                                 | Central Public Health Laboratory - LACEN -Bahia, Salvador, Brazil   | Central Public Health Laboratory - LACEN -Bahia, Salvador, Brazil                                                                                 | Stephane Tosta, Luciana Oliveira, Vanessa Nardy,Patricia Cajado,Marcela Gómez, Breno Dominguez, Jaqueline Gomes, Vagner Fonseca,Marta Giovanetti,Luiz Alcantara, Felicidade Pereira, Arabela Leal                                                                                                                                                                                         |
| EPI_ISL_979352                                                                                                                                 | Laboratorio Estatal de Salud Pública de Nuevo León                  | Laboratorio de Infectología Molecular, Departamento de Bioquímica y Medicina Molecular, Facultad de Medicina - Universidad Autónoma de Nuevo León | Kame A. Galán-Huerta, María F. Herrera-Saldivar, Natalia Martínez-Acuña, Sonia A. Lozano-Sepúlveda, Daniel Arellanos-Soto, Ana M. Rivas-Estilla, Samuel Buentello-Wong, Else del Carmen García-García, Gloria A. Jasso-de-la-Peña, Roberto Montes-de-Oca, Consuelo Treviño-Garza, Manuel E. de-la-O-Cavazos                                                                               |
| EPI_ISL_981383, EPI_ISL_981385, EPI_ISL_981387                                                                                                 | IAL Regional de Bauru                                               | Instituto Adolfo Lutz, Interdisciplinary Procedures Center, Strategic Laboratory                                                                  | Claudio Tavares Sacchi, Claudia Regina Gonçalves, Erica Valessa Ramos Gomes, Karoline Rodrigues Campos                                                                                                                                                                                                                                                                                    |
| EPI_ISL_981706, EPI_ISL_981707, EPI_ISL_981708, EPI_ISL_981709, EPI_ISL_981710, EPI_ISL_981711, EPI_ISL_981712, EPI_ISL_981713, EPI_ISL_981714 | University Hospitals of Geneva, Laboratory of Virology              | HUG, Laboratory of Virology and the Health2030 Genome Center                                                                                      | Samuel Cordey, Ana Rita Goncalves, Laurent Kaiser, Lorenzo Cerutti, Henri Pegeot, Melyssa Elies, Deborah Penet, Keith Harshman, Ioannis Xenarios, Emmanouil Dermitzakis                                                                                                                                                                                                                   |
| EPI_ISL_983865, EPI_ISL_983866, EPI_ISL_983868                                                                                                 | Central Laboratory of Public Health of Rio Grande do Sul (Lacen-RS) | State Center for Health Surveillance of the Health Department of the State of Rio Grande do Sul (CEVS/SES-RS)                                     | Aline Campos, Cynthia Molina, Lara Crescente, Leticia Garay, Ludmila Fiorenzano Baethgen, Richard Salvato, Tatiana Gregianini                                                                                                                                                                                                                                                             |
| EPI_ISL_984243, EPI_ISL_984244                                                                                                                 | Instituto Adolfo Lutz - Regional de Marília                         | Instituto Adolfo Lutz, Interdisciplinary Procedures Center, Strategic Laboratory                                                                  | Claudio Tavares Sacchi, Claudia Regina Gonçalves, Erica Valessa Ramos Gomes, Karoline Rodrigues Campos                                                                                                                                                                                                                                                                                    |
| EPI_ISL_984245, EPI_ISL_984246                                                                                                                 | Instituto Adolfo Lutz Central                                       | Instituto Adolfo Lutz, Interdisciplinary Procedures Center, Strategic Laboratory                                                                  | Claudio Tavares Sacchi, Claudia Regina Gonçalves, Erica Valessa Ramos Gomes, Karoline Rodrigues Campos                                                                                                                                                                                                                                                                                    |
| EPI_ISL_984253                                                                                                                                 | IAL Regional de Marília                                             | Instituto Adolfo Lutz, Interdisciplinary Procedures Center, Strategic Laboratory                                                                  | Claudio Tavares Sacchi, Claudia Regina Gonçalves, Erica Valessa Ramos Gomes, Karoline Rodrigues Campos                                                                                                                                                                                                                                                                                    |
| EPI_ISL_984263                                                                                                                                 | IAL Regional de Bauru                                               | Instituto Adolfo Lutz, Interdisciplinary Procedures Center, Strategic Laboratory                                                                  | Claudio Tavares Sacchi, Claudia Regina Gonçalves, Erica Valessa Ramos Gomes, Karoline Rodrigues Campos                                                                                                                                                                                                                                                                                    |
| EPI_ISL_984619, EPI_ISL_984620, EPI_ISL_984621                                                                                                 | Central Laboratory of Public Health of Rio Grande do Sul (Lacen-RS) | State Center for Health Surveillance of the Health Department of the State of Rio Grande do Sul (CEVS/SES-RS)                                     | Aline Campos, Cynthia Molina, Lara Crescente, Leticia Garay, Ludmila Fiorenzano Baethgen, Richard Salvato, Tatiana Gregianini                                                                                                                                                                                                                                                             |
| EPI_ISL_984622                                                                                                                                 | Department of Clinical Microbiology                                 | GIGA Medical Genomics                                                                                                                             | Keith Durkin, Maria Artesi, Sébastien Bontems, Raphaël Boreux, Bouchra Boujemla, Cécile Meex, Pierrette Melin, Marie-Pierre Hayette, Vincent Bours                                                                                                                                                                                                                                        |
